# Supplementary material
Source: PubMed Central journal article supplement (PMC7442697)
Supplement: NIHMS1608289-supplement-002766_-_Supplemental_Material.pdf [file NIHMS1608289-supplement-002766_-_Supplemental_Material.pdf]

# SUPPLEMENTAL MATERIAL

## Table of contents

### 1. Methods

1.1. Study population

1.2. Diet scores

1.3. DNA methylation assessment

1.4. Statistical Analyses

### 2. Descriptions of participating cohorts

2.1. FHS - The Framingham Heart Study

2.2. ARIC - Atherosclerosis Risk in Communities Study

2.3. GOLDN- Genetics of Lipid Lowering Drugs and Diet Network

2.4. MESA - The Multi-Ethnic Study of Atherosclerosis

2.5. RS - The Rotterdam Study

2.6. Women's Health Initiative – Epigenetic Mechanisms of PM-Mediated CVD Risk (WHI-EMPC)

### 3. References

## 1. Methods

### 1.1 Study Population

The present study included 6,662 European ancestry (EA), 2,702 African ancestry (AA), and 360 Hispanic ancestry (HA) participants from five cohorts of the Cohorts for Heart and Aging Research in Genetic Epidemiology Consortium (CHARGE), including ARIC, FHS, GOLDN, MESA, and RS. Details of participating cohorts and exclusion criteria are described in Descriptions of participating cohorts. Participants' characteristics are presented in Supplemental Material Table 1. The protocol was approved by all participating institutions' Institutional Review Board. All participants provided written informed consent.

### 1.2. Diet Scores

All participating cohorts used food frequency questionnaires (FFQs) to assess dietary intake. Each FFQ has been validated in previous studies.<sup>1-8</sup> FFQs used in each cohort, methods of quality control, and diet score development are detailed herein and in Supplemental Material Table 1. We calculated two complementary diet scores (Box 1), Mediterranean-style diet score (MDS) and the Alternative Healthy Eating Index (AHEI), based on prior studies.<sup>9-11</sup>

#### Box 1.

$$MDS = \text{Vegetable}_{QR} + \text{Fruit}_{QR} + \text{Nut}_{QR} + \text{Legume}_{QR} + \text{Whole-grain}_{QR} + \text{Fish}_{QR} + \text{Red-meat}_{inv\_QR} + \text{MSR}_{QR} + \text{Alcohol}$$
$$AHEI = \text{Vegetable}_{10} + \text{Fruit}_{10} + \text{Nuts \& Legume}_{10} + \text{Whole-grain}_{10} + \text{SSB \& Fruit Juice}_{inv\_10} + \text{Red-meat}_{inv\_10} + \text{EPA \& DHA}_{10} + \text{PUFA}_{10} + \text{trans-Fat}_{inv\_10} + \text{Sodium}_{inv\_10} + \text{Alcohol}$$

QR: sex-specific quartile rank

inv\_QR: inversed sex-specific quartile rank

For alcohol in MDS: a score of 1 if consumption  $\geq 10$  grams/day and  $\leq 25$  grams/day for men or  $\geq 5$  grams/day and  $\leq 15$  grams/day for women

10: A score of 0 to 10 using thresholds that largely based on dietary guidelines<sup>11</sup>

inv\_10: an inversed score of 0 to 10 using thresholds that largely based on dietary guidelines<sup>11</sup>

The MDS consists of nine components: vegetables, fruits, nuts, legumes, whole grains, fish, red meat, ratio of monounsaturated fatty acids (MUFA) to saturated fatty acids (SFA), and alcohol.<sup>9,10</sup> We categorized consumption of each food component into sex-specific quartiles for each participating study cohort. We assigned scores of 0, 1, 2, and 3 to all components except red meat and alcohol, from the

Supplemental Matrial Table 1. Participant characteristics and methods for measurements of DNA methylation and overall diet quality

| Cohort  | N                           | Age (years) | Women (%) | Race/Ethnicity | DNA Methylation tissue | DNA Methylation array | Dietary assessment                                                       | Family Cohort | White blood cell counts                                                             | BMI (kg/m <sup>2</sup> ) | Current Smoking status | Physical activity score                               | Energy intake (kcal/day) | Alcohol (g/day)                |
|---------|-----------------------------|-------------|-----------|----------------|------------------------|-----------------------|--------------------------------------------------------------------------|---------------|-------------------------------------------------------------------------------------|--------------------------|------------------------|-------------------------------------------------------|--------------------------|--------------------------------|
| ARIC    | 3,431                       | 54 ± 6      | 63%       | EA, AA         | Whole blood            | Illumina 450K         | 66 item, interviewer administered semi-quantitative modified Willett FFQ | No            | Determined by automated particle Coulter Counters                                   | 28.6 ± 5.9               | 27%                    | 2.3 ± 0.7                                             | 1572 ± 584               | 5 ± 13                         |
| FHS     | 3,359                       | 58 ± 13     | 55%       | EA, AA         | Whole blood            | Illumina 450K         | 126 item self-administered semi-quantitative Willett FFQ                 | Yes           | Estimated using Houseman method                                                     | 27.9 ± 5.5               | 8%                     | 36 ± 6                                                | 1913 ± 635               | 9 ± 12                         |
| GOLDN   | 1,082                       | 18 to 87    | 51.83%    | EA             | CD4+ T-cells           | Illumina 450K         | 124 item, self-administered, (DHQ)                                       | Yes           | Cell sorted                                                                         | 16.56 to 52.66           | 8%                     | 0 to 17 /day                                          | 471 to 5548              | 0 to 34                        |
| MESA    | 1,250 (971 with all covars) | 70 ± 9      | 51.00%    | AA, EA, HA     | CD14+ Monocytes        | Illumina 450K         | 120 item, self-administered, modified Block-FFQ                          | No            | Purified monocytes, % residual cell types estimated from gene expression signatures | 29.8 ± 5.5               | 8.9%                   | 7.5 ± 4.6                                             | 1750 ± 883               | 6 ± 12                         |
| RSIII-1 | 440                         | 58.3 ± 7.6  | 53.00%    |                |                        |                       |                                                                          | No            | Estimated using Houseman method                                                     | 27.2 ± 4.8               | 25%                    | median MET hours per week: 37.7 95% range [2.3-201.4] | 2380 ± 826               | median: 6.8 95% range [0-35.4] |
| RSII-3  | 362                         | 70.8 ± 3.2  | 57%       |                |                        |                       |                                                                          | No            | measured cell counts (monocytes, granulocytes, and lymphocytes)                     | 27.5 ± 4.2               | 9%                     | 83.9 [16-182]                                         | 1974 ± 635.7             | 6.2 [0-31.3]                   |
| RSIII-2 | 149                         | 60.7 ± 4.5  | 67.80%    | EA             | Whole blood            | Illumina 450K         | 389 item, self-administered FFQ for Dutch adults                         | No            | measured cell counts (monocytes, granulocytes, and lymphocytes)                     | 27.3 ± 4.0               | 9%                     | 39.5 [1.5-250.5]                                      | 2257 ± 679.7             | 8.3 [0-29.1]                   |

ARIC: Atherosclerosis Risk in Communities Study; FHS: The Framingham Heart Study; GOLDN: Genetics of Lipid Lowering Drugs and Diet Network; MESA: The Multi-Ethnic Study of Atherosclerosis; RS: The Rotterdam Study. AA: African ancestry; EA: European ancestry; HA: Hispanic ancestry. FFQ: food frequency questionnaire; DHQ: diet history questionnaire

lowest to highest quartiles. We reversed the order of the scores for red meat. For alcohol, we assigned a score of 1 if consumption was  $\geq 10$  grams/day and  $\leq 25$  grams/day for men or  $\geq 5$  grams/day and  $\leq 15$  grams/day for women and 0 for all other values. All the scores were summed which created the MDS, which ranged from 0 to 25, with higher scores indicating a healthier dietary pattern. The AHEI included 11 components including vegetables, fruits, nuts and legumes, sugar-containing beverages, whole grains, red meat, eicosapentaenoic acid (EPA) and docosahexaenoic acid (DHA), polyunsaturated fatty acids (PUFA without EPA and DHA), trans-fatty acids, sodium, and alcohol.<sup>11</sup> A score of 0 to 10 was assigned for each component, with a score of 10 indicating that the participant had met dietary recommendations based on the reported relations between each diet component and chronic diseases. The AHEI score ranges from possible values of 0 to 110. A higher AHEI score largely reflects a better adherence to the contemporaneous dietary guideline. Dietary recommendations for the 11 components of the AHEI were similar in the 2010 Dietary Guidelines for Americans compared to the 2015 Dutch food-based dietary guideline. We therefore used the same cut-off values for all AHEI components in our participating cohorts, including four US cohorts and the Dutch cohort.

### ***1.3. DNA methylation assessment***

Methylation profiles were measured using the Illumina 450K BeadChip using DNA derived from all leukocytes, CD4<sup>+</sup> T-cells, or CD14<sup>+</sup> monocytes in peripheral blood (Supplemental Material Table 1). DNA preparation, bisulfite conversion, methylation profiling, quality control procedures, and raw data normalization for participating cohorts are detailed in Descriptions of participating cohorts. We analyzed DNA methylation signal  $\beta$  values, i.e., methylated signals divided by the sum of methylated and unmethylated signals. We excluded probes on the X and Y chromosomes to avoid sex bias.

### ***1.4. Statistical Analyses***

***1.4.1.*** Epigenome-wide association analysis. We first conducted a two-step analysis in EA participants, i.e., discovery in the FHS (n=3,266) and replication in the meta-analysis of the ARIC, GOLDN, MESA,

and RS (n=3,396). In the discovery analysis, we considered CpGs with false discovery rate (FDR) < 0.05 significant and forwarded these CpGs for replication analysis. We conducted meta-analysis to aggregate results generated by each replication cohort. We used random-effects models to account for heterogeneity between studies. In meta-analysis, each study was given a weight in proportion to its precision by using the inverse of the variance (i.e., inverse variance weighted random-effects models). We considered those with p-value < 0.05/number of CpGs tested (i.e., Bonferroni correction) replicated CpGs. We used linear regression models with adjustment for sex, age, and energy intake in the discovery and replication analyses. Linear mixed models were used when adjustment for kinship was needed. Models were also adjusted for estimated leukocyte composition and technical variables in a cohort-specific manner (See Descriptions of participating cohorts).

We also conducted a one-step analysis, i.e., meta-analyzed all EA cohorts using random effects models with internal validation. We reported CpGs with FDR < 0.05 in the meta-analysis and had p-value < 0.05 with concordant direction of effect in the discovery and replication cohorts (i.e., internally validated). We adjusted for the same covariates in the two-step analysis. In both analyses, to select independent CpGs, we excluded those close to (within  $\pm$  500kb) and correlated with (Pearson  $|r| > 0.7$ ) a CpG with a lower p-value. We also examined if the association remained significant with additional adjustment for smoking status, physical activity, and BMI.

We conducted similar analyses in AA and HA participants and performed trans-ethnic meta-analysis in all participants (including EA, AA, and HA participants). Because of the limited sample size of AA and HA participants, we considered significant CpGs (at FDR < 0.05) in the trans-ethnic analysis as secondary findings.

**1.4.2. Association with CVD risk factors.** We evaluated the association of diet score-associated CpGs with CVD risk factors reported in the MRC-IEU EWAS catalog [<http://www.ewascatalog.org>].

**1.4.3. Mendelian Randomization (MR) analysis.** We conducted bidirectional MR analysis to infer if there were causal relations between diet-associated CpGs and cardiometabolic risk factors including BMI, waist-to-hip ratio adjusted for BMI (WHRadjBMI), triglyceride and high-density lipoprotein cholesterol (HDL) concentrations, and type 2 diabetes. We performed the two-sample MR analysis using R package *TwoSampleMR*.<sup>12</sup> To test if differential DNA methylation may trigger cardiometabolic risk factor changes (i.e., CpG → trait), we used independent *cis*-meQTL variants (pair-wise linkage disequilibrium (LD) R-squared < 0.1, minor allele frequency > 0.01, imputation R-squared > 0.5, p-value for association with CpGs <  $5 \times 10^{-8}$ ) as instrumental variables (IVs). The *cis*-meQTL variants were identified in 4,170 FHS participants (See section for Methylation Quantitative Trait Loci).<sup>13</sup> The number of IVs utilized in these analyses varied for different CpGs. We obtained effect size and corresponding standard error of these IVs in relation to cardiometabolic risk factors from the published genome-wide association studies (GWAS) with largest sample size for BMI,<sup>14</sup> WHRadjBMI,<sup>15</sup> triglycerides and HDL concentrations,<sup>16</sup> and type 2 diabetes.<sup>17</sup> We also tested if the observed differential DNA methylation was caused by cardiometabolic risk factor (i.e., trait → CpG). To test this hypothesis, we used single nucleotide polymorphisms (SNPs) significantly associated with cardiometabolic risk factors identified by the above mentioned GWAS.<sup>14-17</sup> We excluded SNPs with low imputation quality (imputation R-squared  $\leq 0.5$ ), minor allele frequency  $\leq 0.01$  in the FHS, and LD R-squared  $\geq 0.1$  based on the 1000 Genomes Project CEU reference population.<sup>18</sup> The number of SNPs utilized in the final MR analyses included 801 SNPs for BMI, 43 SNPs for WHR, 19 SNPs for triglycerides, 53 SNPs for HDL, and 294 SNPs for type 2 diabetes. The effect size and corresponding standard error of these SNPs with CpGs were obtained in the FHS.<sup>13</sup> We performed the MR analysis primarily using the inverse variance weighted (IVW) method. To test if the assumption of no horizontal pleiotropy effect, we evaluated the p-value for the intercept generated using the MR-Egger method.

**1.4.4.** Association with all-cause mortality. In parallel with the present study, another project of the CHARGE Epigenetic Working Group analyzed the epigenome-wide association between DNA methylation and all-cause mortality using Cox proportional hazard models. The mortality study meta-analyzed up to 10,083 samples from 10 EA cohorts, including 2,536 death events documented with median follow-up 6.4 to 20 years (Supplemental Material Table 2). We reported their meta-analysis results generated using random-effects models for diet score-associated CpGs identified in the present study.

**1.4.5.** Functional and regulatory annotation. We performed hypergeometric tests using the `phyper` function in R with default values to examine the genomic characteristics of the diet score-associated CpGs. We calculated the Spearman ranked correlation coefficients for mean DNA methylation levels of these CpGs measured in peripheral blood samples with those measured in other tissues using a dataset in the Gene Expression Omnibus (GEO Series accession number GSE48472).<sup>19</sup> We queried *cis*-meQTL variants in the NHGRI-EBI Catalogue of Published GWAS to test if these variants are associated with CVD and risk factors.<sup>20</sup> We used the platform of the Functional Mapping and Annotation of Genome-Wide Association Studies<sup>21</sup> to examine expression of genes annotated to diet-associated CpGs in 30 general tissues included in the Genotype-Tissue Expression (GTEx v6) database<sup>22</sup> and to perform gene-set enrichment analysis using default values. Bonferroni corrected p-values were reported for all enrichment analyses.

## **2. Descriptions of participating cohorts**

### **2.1. Framingham Heart Study (FHS)**

**2.1.1.** Cohort and Study Sample. The Framingham Heart Study (FHS) is a population-based, prospective study.<sup>23,24</sup> For the present study, we included a sub-cohort of participants who attended the FHS Offspring examination cycle 8 (2005-2008; n=3,021) or the FHS Third Generation cohort examination cycle 2 (2008-2011; n=3,411). Participants were included if they had had a history of myocardial infarction or

Supplemental Material Table 2. Cohorts for analysis of diet-associated CpGs and all-cause mortality in EA participants

| Cohort                                           | N    | N.Death | Age          | Women, % | Median follow-up years | DNA methylation tissue |
|--------------------------------------------------|------|---------|--------------|----------|------------------------|------------------------|
| Atherosclerosis Risk in Communities (ARIC) Study | 969  | 331     | 59.8 (5.5)   | 59       | 20.0 (5.2)             | Whole blood            |
| Cardiovascular Health Study (CHS)                | 419  | 373     | 75.0 ( 4.9 ) | 60       | 12.7 ( 6.1)            | Whole blood            |
| ESTHER                                           | 1000 | 265     | 62.1 (6.5)   | 50       | 13.7 (3.5)             | Whole blood            |
| Framingham Heart Study (FHS)                     | 2427 | 403     | 66.3 (9.0)   | 55       | 9.1 (2.2)              | Whole blood            |
| InChianti Study                                  | 488  | 104     | 10.0 (1.6)   | 62       | 10.0 (1.6)             | Whole blood            |
| KORA F4 Study                                    | 1727 | 89      | 61.0 (8.9)   | 51       | 6.4 (0.9)              | Whole blood            |
| Lothian Birth Cohort (LBC) Study - 1921          | 418  | 366     | 79.1 (0.6)   | 60       | 9.8 (4.7)              | Whole blood            |
| Lothian Birth Cohort (LBC) Study - 1936          | 900  | 192     | 69.6 (0.8)   | 50       | 10.2 (2.4)             | Whole blood            |
| Normative Aging Study (NAS)                      | 640  | 221     | 72.8 (6.8)   | 0        | 10.5 (3.3)             | Whole blood            |
| Women's Health Initiative (WHI)*                 | 1095 | 192     | 62 (6.9)     | 100      | 11.5 (3.5)             | Whole blood            |

EA: European ancestry

\* European ancestry participants in The Epigenetic Mechanisms of PM-Mediated CVD Risk (WHI-EMPC)



stroke, cancer (other than basal cell carcinoma), or bariatric surgery, as well as had no data on DNA methylation, diet, and covariates. After exclusion, data collected from 3,266 FHS participants were analyzed. All participants provided written informed consent and the Framingham Heart Study protocols and procedures were approved by the Institutional Review Board for Human Research at Boston University Medical Center.

**2.1.2. Genome-wide DNA methylation profiling.** Buffy coat fractions were obtained from peripheral whole blood samples and extracted genomic DNA using the Genra Puregene DNA extraction kit (Qiagen, Venlo, Netherlands). We used EZ DNA Methylation Kit (Zymo Research, Irvine, CA) to perform bisulfite conversion to the extracted genomic DNA. After whole genome amplification, fragmentation, array hybridization, and single-base pair extension, we then quantified DNA methylation in three laboratories using the Illumina Infinium HumanMethylation450 (450K) BeadChip. We used the watermelon R package with the DASEN methodology to normalize laboratory-specific DNA methylation.<sup>25</sup> DNA methylation beta values were calculated as the ratio of methylated probe intensity to the overall intensity. We implemented rigorous quality control that has been described elsewhere.<sup>26</sup> Briefly, we excluded study participants with a probe missing rate >1%, poor SNP matching to the 65 SNP control probe locations, and outliers by multi-dimensional scaling techniques. At the probe level, we also excluded CpGs that: (1) have a missing rate of >20% at  $p < 0.01$ , (2) have been previously identified to map to multiple locations, or (3) have an underlying SNP (minor allele frequency >5% in European ancestry (EUR) 1,000 genomes project data) at the CpG site or within 10 bp of the single base extension. After quality control, about 430,000 autosomal CpG sites were analyzed subsequently. The FHS methylation data are available at dbGaP under the accession number phs000724.v2.p9.

**2.1.3. Diet assessment.** A previously validated, self-administered semi-quantitative 126-item Harvard food frequency questionnaire (FFQ) was used to determine dietary intake for the previous year leading up to an examination.<sup>27</sup> The FFQ was mailed to participants to be completed at home and returned during the

study appointment. FFQ data were excluded if the reported energy intake was <2.5 MJ/d (600 kcal/d) for both men and women,  $\geq 16.7$  MJ/d (4000 kcal/d) for women,  $\geq 17.5$  MJ/d (4200 kcal/d) for men, and if  $\geq 13$  food items were left blank.

**2.1.4. Covariates assessment.** All covariates were assessed when participants visited the research clinic in accordance with standard protocols. Body mass index (BMI) was calculated as weight divided by height squared ( $\text{kg}/\text{m}^2$ ). Current smokers were defined as participants who self-reported smoking at least one cigarette per day in the prior year. Energy intake was calculated using the Harvard FFQ. A physical activity score was generated using the intensity and time spent performing each type of activity assessed by the physical activity questionnaire.<sup>28</sup> White blood cell counts (B cells, granulocytes, monocytes, NK cells, CD4+ T-cells, CD8+ T-cells) was estimated using the Houseman method.<sup>29</sup>

**2.1.5. Epigenome-wide association analysis.** We first applied the sva R package to construct surrogate variables in each laboratory. To remove potential batch effects, we calculated the residuals of DNA methylation beta value with adjustment for surrogate variables that associated with diet scores at p-value <0.1. In the subsequent analysis, we used the sum of laboratory-specific residuals of DNA methylation beta values and median of DNA methylation beta values as the dependent variables. Diet scores were analyzed continuously as the independent variable. Three models were implemented. In the primary model, covariates included age, sex, energy intake, laboratories, and white blood cell counts. We conducted two additional models in sensitivity analysis. The first sensitivity model additionally adjusted for current smoking status and physical activity level. The second sensitivity model additionally adjusted for BMI. The relatedness in our study sample (kinship) was accounted for using linear mixed models.

**2.1.6. Methylation Quantitative Trait Loci (meQTLs).** We analyzed meQTL variants in 4,170 FHS participants. We genotyped our participants using Affymetrix 550K Array and imputed single nucleotide polymorphisms (SNPs) with the 1,000 Genomes Project reference panel.<sup>18</sup> We first calculated the

residuals for DNA methylation using linear mixed regression models with adjustment for sex, age, estimated leukocyte counts, technical covariates, and kinship and then regressed the residuals on SNPs. We defined cis-meQTL variants as SNPs associated with DNA methylation levels of nearby CpGs ( $\pm 500$  kilobases) with minor allele frequency  $> 0.01$  and imputation R-squared  $> 0.5$ . For the purpose of the present study, we only analyzed cis-meQTL variants with p-value  $< 5 \times 10^{-8}$ .

**2.1.7. Acknowledgements.** The FHS is funded by National Institutes of Health contract N01-HC-25195. The laboratory work for this investigation was funded by the Division of Intramural Research, National Heart, Lung, and Blood Institute, National Institutes of Health, Bethesda, MD. The analytical component of this project was funded by the Division of Intramural Research, National Heart, Lung, and Blood Institute, and the Center for Information Technology, National Institutes of Health, Bethesda, MD.

## **2.2. *Atherosclerosis Risk in Communities (ARIC) Study***

**2.2.1. Cohort and Study Sample.** The ARIC Study is a community-based cohort of 15,792 predominantly black and white men and women aged 45-64 years that was designed to investigate cardiovascular disease and its risk factors (<http://www.cscce.unc.edu/aric/>). The participants were recruited and enrolled between 1987 and 1989 from 4 U.S. communities: Forsyth County, NC; Jackson, MS; suburbs of Minneapolis, MN; and Washington County, MD. An ethics committee at each site approved the study protocol and study participants provided informed consent. Participants were excluded if they had a history of myocardial infarction (n=592) or had a history of cancer (n=814). After excluding participants without whole blood derived DNA methylation profiling and quality control for FFQ (see below), a total of 3,431 participants (966 Caucasian participants and 2,465 African-American participants) were analyzed.

**2.2.2. Genome-wide DNA methylation profiling.** Genomic DNA was extracted from peripheral blood leukocyte samples using the Gentra Puregene Blood Kit (Qiagen; Valencia, CA, USA) according to the manufacturer's instructions ([www.qiagen.com](http://www.qiagen.com)). Bisulfite conversion of 1  $\mu$ g genomic DNA was

performed using the EZ-96 DNA Methylation Kit (Deep Well Format) (Zymo Research; Irvine, CA, USA) according to the manufacturer's instructions ([www.zymoresearch.com](http://www.zymoresearch.com)). Bisulfite conversion efficiency was determined by PCR amplification of the converted DNA before proceeding with methylation analyses on the Illumina platform using Zymo Research's Universal Methylated Human DNA Standard and Control Primers.

DNA was isolated from white blood cells as per the standard DNA extraction procedure (Autopure LS, Qiagen). 500 ng of extracted DNA was bisulfite-modified using the EZ DNA Methylation kit (Zymo Research, D5004) following the manufacturer's instructions. The Illumina Infinium HumanMethylation450 Beadchip array (HM450) was used to measure DNA methylation (Illumina Inc.; San Diego, CA, USA). Raw methylation data were extracted using Illumina GenomeStudio software (version 2011.1, Methylation module 1.9.0). The methylation score for each CpG was represented as a beta value according to the fluorescent intensity ratio of methylated to overall signals. Background subtraction was conducted with the GenomeStudio software using built-in negative control bead types on the array.

Subset quantile within array normalization (SWAN) was used to normalize DNA methylation beta-values.<sup>30</sup> Further, in this study, we conducted all analyses at the single probe level, and therefore, any differences in probe type should not strongly influence the results.

**2.2.3. Diet assessment.** Diet was assessed using a 66-item semi-quantitative food frequency questionnaire (FFQ), modified from the Willett questionnaire, and was administered in person by a trained interviewer at visit 1 (1987-1989).<sup>2,7,31</sup> Participants were excluded who reported extreme total energy intakes (females: <500 or >3,500 kcal/day, males: <700 or >4,500 kcal/day) or were missing responses from more than 15 FFQ items.

**2.2.4. Covariate assessment.** Covariates were assessed at baseline (visit 1). Body mass index (BMI) was calculated as weight divided by height squared ( $\text{kg}/\text{m}^2$ ). Smoking status was categorized as current, former, never, or missing. Physical activity index score ranged from 1 (lowest) to 5 (highest) and was calculated based on intensity and time dedicated to sport and non-sport exercise during leisure time. Heavy alcohol status was defined as at least 2 drinks/day for females and at least 3 drinks/day for males. White blood cell count was determined by automated particle Coulter Counters within 24 hours after venipuncture in local hospital hematology laboratories.

**2.2.5. Epigenome-wide association analysis.** Three models were implemented as described in the section for the FHS. The association analysis used the diet scores as the independent variables and DNA methylation proportion as outcome, adjusting for age, gender, energy intake, total white blood cell count, and estimated white blood cell proportions. In sensitivity analyses, we additionally adjusted for lifestyle factors (smoking status and physical activity) and BMI.

**2.2.6. Acknowledgements.** The ARIC Study has been funded in whole or in part with federal funds from the NHLBI, NIH, Department of Health and Human Services (HHSN268201700001I, HHSN268201700002I, HHSN268201700003I, HHSN268201700004I, and HHSN268201700005I). The authors thank the staff and participants of the ARIC Study for their important contributions. Funding was also provided by 5RC2HL102419, R01NS087541, and R01HL131136. Dr. Rebholz is supported by a Mentored Research Scientist Development Award from the National Institute of Diabetes and Digestive and Kidney Diseases (K01 DK107782). Ms. Hu is supported by a training grant from the National Institutes of Health (NIH)/National Heart, Lung, and Blood Institute (NHLBI; T32 HL007024).

### ***2.3. Genetics of Lipid Lowering Drugs and Diet Network (GOLDN)***

**2.3.1. Cohort and Study Sample.** The GOLDN population contains European American families who had at least 2 siblings.<sup>32</sup> These families were recruited from two sites of the National Heart, Lung and Blood

Institute Family Heart Study: Salt Lake City and Minneapolis. Appropriate Institutional Review Boards from all participating institutions approved the study protocol. All participants provided informed consent. Before each study visit, participants abstained from eating for 8 hours, from consuming alcohol for 24 hours, and from using lipid lowering medications or supplements for 4 weeks. Approximately ~1,350 participants were screened. After exclusions based on eligibility criteria<sup>33</sup> as well as availability of methylation data, 994 participants remained in this analysis.

**2.3.2. Genome-wide DNA methylation profiling.** DNA methylation of GOLDN was measured using the Illumina Infinium HumanMethylation450 Beadchip (Illumina, San Diego, CA) as discussed in.<sup>34,35</sup> Cell type was restricted to CD4+ T-cells that were isolated from frozen buffy coat samples. DNA was isolated using DNeasy kits (Qiagen, Venlo, Netherlands). Genome Studio software (Illumina, San Diego, CA) was used to estimate  $\beta$  scores (proportion of total signal from the methylation-specific probe or color channel) and detection P-values (probability that the probe's total intensity falls within the background signal intensity). Quality control exclusion criteria were:  $\beta$  scores with an associated detection P-value exceeding 0.01, samples with more than 1.5% missing data points across ~470,000 autosomal CpGs, or probes where 10% of samples or more failed to yield adequate intensity.<sup>35</sup> After exclusions,  $\beta$  scores were normalized (separately for Infinium I and II chemistries) using the ComBat package to address batch effects.<sup>30</sup> Finally, methylation loci were removed where the probe sequence mapped to a location that did not match the annotation file or to more than one locus. The final analysis included 463,995 CpG loci.

**2.3.3. Diet assessment.** Participants' habitual diet was ascertained using a version of the Diet History Questionnaire (DHQ) developed at the National Cancer Institute.<sup>32</sup> The questionnaire consisted of 124 food items, which included questions on portion size and dietary supplements. The DHQ food list and nutrient database was based on national dietary data [US Department of Agriculture (USDA) 1994-6 Continuing Survey of Food Intake by Individuals, available from the USDA Food Surveys Research Group]. Further details are available in prior publications.<sup>32</sup> Energy intake was calculated based on

USDA's 1989-91 Continuing Survey of Food Intakes of Individuals (CSFII). Participants with total energy intake outside of range 800-5500 kcal in men or 600-4500 kcal in women were excluded (n=40).

**2.3.4. Covariate assessment.** Covariates were ascertained during the clinical examination. Body mass index (BMI) was calculated as weight (kg)/height (m)<sup>2</sup>. Smokers were defined as participants who had quit smoking less than a year to the day of clinical visit, in addition to current smokers. Physical activity was defined as a continuous score based on intensity and duration of activities.

**2.3.5. Epigenome-wide association analysis.** We used the `lmekin` function in the `kinship` R software package for all analyses (Atkinson B, Therneau T. `kinship`: mixed-effects Cox models, sparse matrices, and modeling data from large pedigrees. 2007; R package version 1.1.0–17). Three models were used to quantify epigenome-wide associations with the continuous dietary indices. All models included family as a random effect. Fixed effect covariates in the first model included age, sex, and total energy intake. As sensitivity analysis, the second model additionally adjusted for current smoking status and physical activity, while third model additionally adjusted for BMI.

## **2.4. Multi-Ethnic Study of Atherosclerosis (MESA)**

**2.4.1 Cohort and Study Sample.** The Multi-Ethnic Study of Atherosclerosis (MESA) is a longitudinal study with a multi-ethnic, mixed-gender cohort of 6,814 participants, designed to investigate prevalence, correlates, and progression of subclinical CVD in older adults<sup>1</sup> at 6 U.S. sites. Since its inception in 2000, five clinic visits collected extensive clinical, socio-demographic, lifestyle, behavior, laboratory, nutrition, and medication data. DNA methylation and gene expression were measured in purified (CD14+) monocyte samples from the April 2010 – February 2012 examination (exam 5) of 1,264 randomly selected MESA participants from four MESA field centers (Baltimore, MD; Forsyth County, NC; New York, NY; and St. Paul, MN) as previously described in greater detail. The study protocol was approved

by the Institutional Review Board at each site. Exclusion criteria included a history of myocardial infarction, stroke, or cancer. All participants signed informed consent.

**2.4.2. Genome-wide DNA methylation profiling.** DNA methylation sample, measurement, normalization, and quality control. As previously described,<sup>37</sup> blood was initially collected in sodium heparin-containing Vacutainer CPT™ cell separation tubes (Becton Dickinson, Rutherford, NJ, USA) to separate peripheral blood mononuclear cells from other elements within 2 h from blood draw. Subsequently, monocytes were isolated with the anti-CD14-coated magnetic beads, using AutoMACs automated magnetic separation unit (Miltenyi Biotec, Bergisch Gladbach, Germany). Based on flow cytometry analysis of 18 specimens, monocyte samples were consistently >90% pure. DNA and RNA were isolated from samples simultaneously using the AllPrep DNA/RNA Mini Kit (Qiagen, Inc., Hilden, Germany). DNA and RNA QC metrics included optical density measurements, using a NanoDrop spectrophotometer and evaluation of the integrity of 18s and 28s ribosomal RNA.

Illumina HumanMethylation450 BeadChips and HiScan reader were used to perform the epigenome-wide methylation analysis. Bead-level methylation data were summarized in GenomeStudio. Because a two-channel system and both Infinium I and II assays were used, normalization was performed in several steps using the lumi package. “Smooth quantile normalization” was used to adjust for color bias. Next, the data were background adjusted by subtracting the median intensity value of the negative control probes. Lastly, data were normalized across all samples by standard quantile normalization applied to the bead-type intensities and combined across Infinium I and II assays and both colors. QC measures included checks for sex and race/ethnicity mismatches, and outlier identification by multidimensional scaling plots. To estimate residual sample contamination for data analysis, we generated separate enrichment scores for neutrophils, B cells, T cells, monocytes, and natural killer cells. We implemented a Gene Set Enrichment Analysis as previously described<sup>37</sup> to calculate the enrichment scores using the gene signature of each



blood cell type from previously defined lists.<sup>38</sup> The final methylation value for each methylation probe was computed as the beta-value, essentially the proportion of the methylated to the total intensity.

**2.4.3. Diet assessment.** Dietary pattern phenotypes were derived from participant responses to an assessment of diet, administered using a food frequency questionnaire (FFQ) at MESA exam 5. The assessment of diet was a modified Block-style 120-item FFQ, detailing their usual consumption frequency and serving size of specific foods and beverages over the past year. The MESA FFQ was developed for a multi-ethnic population, and its validity has been demonstrated previously.<sup>39</sup> For each food item, the consumption frequency (times/day, week or month) and serving size (small, medium or large) were recorded. Frequency options ranged from ‘rare or never’ to ‘2 times/day’ for each food item. Related line items were combined to form 47 different food groups. Participants were excluded if implausible data were reported on dietary information (consuming >25104 or <2510 kJ/day).<sup>40</sup>

**2.4.4. Covariates.** Body mass index (BMI) was calculated as weight (kg)/height (m)<sup>2</sup>. Smoking status was recorded as never, former, and current smokers. We assessed physical activity using the MESA Typical Week Physical Activity Survey.<sup>41</sup>

**2.4.5. Epigenome-wide association analysis.** We analyzed the data for the MDS and AHEI scores in parallel, using three linear regression models, for each race separately, with dietary scores as the independent variable. The dependent variable was the DNA methylation beta value after removing the variation due to the batch effect across multiple chips as well as the sample position on the chip. Covariates for model 1 included age, sex, total energy intake, study site, and residual cell estimates of neutrophils, B cells, T cells, monocytes, and natural killer cells to adjust for residual sample contamination with non-monocyte cell types. Model 2 included model 1 covariates and adjusted for smoking status at exam 5, and moderate/vigorous physical activity (MET-MIN/WK). Model 3 included model 2 covariates and adjusted for BMI.

**2.4.6. Acknowledgements.** MESA and the MESA SHARe project are conducted and supported by the National Heart, Lung, and Blood Institute (NHLBI) in collaboration with MESA investigators. Support for MESA is provided by contracts N01-HC-95159, N01-HC-95160, N01-HC-95161, N01-HC-95162, N01-HC-95163, N01-HC-95164, N01-HC-95165, N01-HC-95166, N01-HC-95167, N01-HC-95168, N01-HC-95169, UL1-TR-001079, UL1-TR-000040, and DK063491. The MESA Epigenomics & Transcriptomics Study was funded by NHLBI grant R01HL101250 to Wake Forest University Health Sciences. Analysis of MESA data reported in this publication was also supported by the National Institute On Aging of the National Institutes of Health under Award Number R03AG056959. The content is solely the responsibility of the authors and does not necessarily represent the official views of the National Institutes of Health.

## **2.5. Rotterdam Study (RS)**

**2.5.1. Cohort and Study Sample.** The RS is a large prospective, population-based cohort study aimed at assessing the occurrence of and risk factors for chronic diseases (cardiovascular, endocrine, hepatic, neurological, ophthalmic, psychiatric, dermatological, oncological, and respiratory) in the middle-aged and elderly. The study comprises 14,926 subjects in total, living in the well-defined Ommoord district in the city of Rotterdam in the Netherlands. In 1989, the first cohort, Rotterdam Study-I (RS-I), was established and comprised of 7,983 subjects with age 55 years or above. In 2000, the second cohort, Rotterdam Study-II (RS-II) was included with 3,011 subjects who had reached an age of 55 years since 1989. In 2006, the third cohort, Rotterdam Study-III (RS-III) was further included with 3,932 subjects with age 45 years and above. DNA methylation was measured in a random sample of 1,454 participants from the first and second visit of the third cohort (RS-III-1, RS-III-2) and third visit of the second cohort (RS-II-3).

**2.5.2. Genome-wide DNA methylation profiling.** DNA was extracted from whole peripheral blood (stored in EDTA tubes) by standardized salting out methods. Genome-wide DNA methylation levels were measured using the Illumina Human Methylation 450K array (24). In short, samples (500ng of DNA per sample) were first bisulfite treated using the Zymo EZ-96 DNA-methylation kit (Zymo Research, Irvine, CA, USA). Next, samples were hybridized to the arrays according to the manufacturers' protocol. The methylation percentage of a CpG site was reported as a beta-value ranging between 0 (no methylation) and 1 (full methylation). The data preprocessing was additionally performed in both datasets using an R programming pipeline which is based on the pipeline developed by Tost & Touleimat,<sup>42</sup> which includes additional parameters and options to preprocess and normalize methylation data directly from idat files. We excluded probes which had a detection p-value >0.01 in >95% of samples. 11,648 probes at X and Y chromosomes were excluded to avoid gender bias. The raw beta values were then background corrected and normalized using the DASEN option of the WateRmelon R-package.<sup>25</sup> Per individual probe, participants with methylation levels higher than three times the inter-quartiles range (IQR) were excluded.

**2.5.3. Diet assessment.** Subjects completed a self-administered FFQ containing of 389 items, based on a validated FFQ for Dutch adults that also took into account preparation methods.<sup>6,43</sup> For each item frequency of consumption (in times per month or week), the numbers of servings per day (expressed in standardized household measures, e.g., spoon or cup, and natural units, e.g., piece of fruit or slice of bread), and the preparations methods were included. To derive total energy and nutrient intakes per day the received dietary data were linked to the Dutch Food Composition Table of 2011. We excluded participants with implausible energy intake, for which cut-offs were set at <500 or >5000 kcal/day.

**2.5.4. Covariates assessment.** Height and weight were measured during the center visit and BMI was calculated ( $\text{kg}/\text{m}^2$ ). During home visit interviews, data on tobacco smoking were collected. Information on smoking history was acquired from questionnaires, and categorized as never, former or current smoking. Energy intake was calculated using the FFQs. Data on physical activity were obtained through

the LASA Physical Activity Questionnaire.<sup>44,45</sup> Because of differently extended data generation for physical activity between cohorts, z-scores were calculated to obtain comparable data. For the RS-III-1 we estimated leukocyte proportions (B-cells, CD4+ T-cells, CD8+ T-cells, granulocytes, monocytes and NK-cells) by a formula developed by Houseman.<sup>29,46</sup> For RS-II-3 and RS-III-2 we used white blood cell counts (WBC), i.e. lymphocytes, monocytes, and granulocytes, which were assessed with a Coulter AcT diff2 Hematology Analyzer.

**2.5.5. Epigenome-wide association analysis.** We modeled cross-sectional associations between Dasen normalized beta-values of the CpG sites as outcome and MDS score or AHEI as exposure using linear mixed effect models. Three models were used. In the first model we adjusted for age, sex, energy intake, white blood cell proportions, array number and position on array. Technical covariates (array number and position on array) were modeled as random effects. The second model was additionally adjusted for smoking and physical activity. In the third model we additionally adjusted for BMI. Finally, we checked all identified CpG sites for cross-reaction or polymorphism.<sup>47</sup> A CpG site was considered polymorphic when a SNP with a minor allele frequency of  $>0.01$  resided at the position of the cytosine or guanine nucleotide, or within 10 bp from the CpG site within the probe binding site.<sup>48</sup>

**2.5.6. Acknowledgements.** The Rotterdam Study is funded by Erasmus Medical Center and Erasmus University, Rotterdam, Netherlands Organization for the Health Research and Development (ZonMw), the Research Institute for Diseases in the Elderly (RIDE), the Ministry of Education, Culture and Science, the Ministry for Health, Welfare and Sports, the European Commission (DG XII), and the Municipality of Rotterdam. The authors are grateful to the study participants, the staff from the Rotterdam Study and the participating general practitioners and pharmacists.

## **2.6. Women's Health Initiative – Epigenetic Mechanisms of PM-Mediated CVD Risk (WHI-EMPC)**

**2.6.1. Cohort and Study Sample.** The WHI is a multi-center prospective study of risk factors for cardiovascular disease, cancer, osteoporotic fractures, and other causes of morbidity and mortality among postmenopausal women.<sup>49,50</sup> Between 1993 and 1998, 68,132 women aged 50-79 years from forty WHI clinical centers throughout the United States (US) were enrolled in the WHI Clinical Trials (CT). WHI CT participants completed a screening visit (SV) and an annual visit (AV) at one, three, six, and nine years after randomization (AV1, AV3, AV6, AV9). The Epigenetic Mechanisms of PM-Mediated CVD Risk (WHI-EMPC), an ancillary study of epigenetic mechanisms underlying associations between ambient particulate matter air pollution and cardiovascular disease, measured DNA methylation in 2,200 randomly selected WHI CT participants (stage 1: SV, AV3, or AV6), remeasured it in 200 participants at a second visit (stage 2: AV3 or AV6), and remeasured again in 43 participants at a third visit among those who participated in the WHI Long Life Study (stage 3: LLS), yielding 2,443 total observations. The analyses of mortality described herein involve 1,095 WHI-EMPC participants of European ancestry.

**2.6.2. Genome-wide DNA methylation profiling.** In 91% of whole blood samples from WHI-EMPC participants, DNA was extracted from peripheral blood leukocytes using a Qiagen/5-Prime method. The remaining samples were extracted using a phenol chloroform (8%), Qiagen/Bioserve (1%), or salt precipitation (<1%) method. Extracted DNA was subjected to high throughput bisulfite conversion using the EZ-96 DNA Methylation™ Kit (Zymo Research; Irvine, CA, USA). DNA methylation was measured on a methylome-wide scale at 485,577 CpG sites using the Illumina 450K Infinium Methylation BeadChip (Illumina Inc.; San Diego, CA, USA). Methylation was quantitatively represented by beta, the proportion of methylated cytosines over the sum of methylated and unmethylated cytosines across the same loci. The data were quality controlled, Beta Mixture Quantile (BMIQ)-normalized to adjust for probe bias,<sup>51</sup> and ComBat-adjusted for stage and plate using empirical Bayes methods.<sup>52</sup>

**2.6.3.** Epigenome-wide association analyses. Associations between each of the 485,577 measured CpG sites and all-cause and cause-specific mortality were modeled using Cox-proportional hazards models adjusted for baseline age, principal components of ancestry, smoking status, alcohol use, education, physical activity, BMI, race/ethnicity, and prevalent disease for hypertension, heart failure, coronary heart disease, stroke, and cancer.

**2.6.4** Acknowledgements. The Women's Health Initiative (WHI) is funded by the National Heart, Lung and Blood Institute, U.S. Department of Health and Human Services, through contracts HHSN268201100046C, HHSN268201100001C, HHSN268201100002C, HHSN268201100003C, HHSN268201100004C, and HHSN271201100004C. The Epigenetic Mechanisms of PM-Mediated CVD Risk (WHI-EMPC) was supported by National Institute of Environmental Health Science grant R01-ES020836. All contributors to WHI science are listed at <https://www.whi.org/researchers/Documents%20%20Write%20a%20Paper/WHI%20Investigator%20Long%20List.pdf>.

### 3. References

1. Feskanich D, Rimm EB, Giovannucci EL, Colditz GA, Stampfer MJ, Litin LB, et al. Reproducibility and validity of food intake measurements from a semiquantitative food frequency questionnaire. *J Am Diet Assoc.* 1993;93(7):790-796.
2. Willett WC, Sampson L, Stampfer MJ, Rosner B, Bain C, Witschi J, et al. Reproducibility and validity of a semiquantitative food frequency questionnaire. *Am J Epidemiol.* 1985;122(1):51-65.
3. Thompson FE, Subar AF, Brown CC, Smith AF, Sharbaugh CO, Jobe JB, et al. Cognitive research enhances accuracy of food frequency questionnaire reports: results of an experimental validation study. *J Am Diet Assoc.* 2002;102(2):212-225.
4. Abiemo EE, Alonso A, Nettleton JA, Steffen LM, Bertoni AG, Jain A, et al. Relationships of the Mediterranean dietary pattern with insulin resistance and diabetes incidence in the Multi-Ethnic Study of Atherosclerosis (MESA). *Br J Nutr.* 2013;109(8):1490-1497.
5. Klipstein-Grobusch K, den Breeijen JH, Goldbohm RA, Geleijnse JM, Hofman A, Grobbee DE, et al. Dietary assessment in the elderly: validation of a semiquantitative food frequency questionnaire. *Eur J Clin Nutr.* 1998;52(8):588-596.
6. Goldbohm RA, van den Brandt PA, Brants HA, van't Veer P, Al M, Sturmans F, et al. Validation of a dietary questionnaire used in a large-scale prospective cohort study on diet and cancer. *Eur J Clin Nutr.* 1994;48(4):253-65.
7. Shimakawa T, Sorlie P, Carpenter MA, Dennis B, Tell GS, Watson R, et al. Dietary intake patterns and sociodemographic factors in the atherosclerosis risk in communities study. *Prev Med.* 1994;23(6):769-780.
8. Rebholz CM, Crews DC, Grams ME, Steffen LM, Levey AS, Miller ER 3rd, et al. DASH (Dietary Approaches to Stop Hypertension) Diet and Risk of Subsequent Kidney Disease. *Am J Kidney Dis.* 2016;68(6):853-861.
9. Trichopoulou A, Costacou T, Bamia C, Trichopoulos D. Adherence to a Mediterranean diet and survival in a Greek population. *N Engl J Med.* 2003;348(26):2599-2608.

10. Fung TT, Rexrode KM, Mantzoros CS, Manson JE, Willett WC, Hu FB. Mediterranean diet and incidence of and mortality from coronary heart disease and stroke in women. *Circulation*. 2009;119(8):1093-1100.
11. Chiuve SE, Fung TT, Rimm EB, et al. Alternative dietary indices both strongly predict risk of chronic disease. *J Nutr*. 2012;142(6):1009-1018.
12. Hemani G, Zheng J, Elsworth B, et al. The MR-Base platform supports systematic causal inference across the human phenome. *Elife*. 2018;7.
13. Huan T, Joehanes R, Song C, Peng F, Guo Y, Mendelson M, et al. Genome-wide identification of DNA methylation QTLs in whole blood highlights pathways for cardiovascular disease. *Nat Commun*. 2019;10(1):4267
14. Yengo L, Sidorenko J, Kemper KE, et al. Meta-analysis of genome-wide association studies for height and body mass index in approximately 700000 individuals of European ancestry. *Hum Mol Genet*. 2018;27(20):3641-3649.
15. Shungin D, Winkler TW, Croteau-Chonka DC, et al. New genetic loci link adipose and insulin biology to body fat distribution. *Nature*. 2015;518(7538):187-196.
16. Willer CJ, Schmidt EM, Sengupta S, et al. Discovery and refinement of loci associated with lipid levels. *Nat Genet*. 2013;45(11):1274-1283.
17. Mahajan A, Taliun D, Thurner M, et al. Fine-mapping type 2 diabetes loci to single-variant resolution using high-density imputation and islet-specific epigenome maps. *Nat Genet*. 2018;50(11):1505-1513.
18. Genomes Project C, Auton A, Brooks LD, et al. A global reference for human genetic variation. *Nature*. 2015;526(7571):68-74.
19. Sliker RC, Bos SD, Goeman JJ, et al. Identification and systematic annotation of tissue-specific differentially methylated regions using the Illumina 450k array. *Epigenetics Chromatin*. 2013;6(1):26.



20. Galperin MY, Fernandez-Suarez XM, Rigden DJ. The 24th annual Nucleic Acids Research database issue: a look back and upcoming changes. *Nucleic Acids Res.* 2017;45(D1):D1-D11.
21. Watanabe K, Taskesen E, van Bochoven A, Posthuma D. Functional mapping and annotation of genetic associations with FUMA. *Nat Commun.* 2017;8(1):1826.
22. Consortium GT. The Genotype-Tissue Expression (GTEx) project. *Nat Genet.* 2013;45(6):580-585.
23. Kannel WB, Feinleib M, McNamara PM, Garrison RJ, Castelli WP. An investigation of coronary heart disease in families. The Framingham offspring study. *Am J Epidemiol.* 1979;110(3):281-290.
24. Splansky GL, Corey D, Yang Q, et al. The Third Generation Cohort of the National Heart, Lung, and Blood Institute's Framingham Heart Study: design, recruitment, and initial examination. *Am J Epidemiol.* 2007;165(11):1328-1335.
25. Pidsley R, CC YW, Volta M, Lunnon K, Mill J, Schalkwyk LC. A data-driven approach to preprocessing Illumina 450K methylation array data. *BMC Genomics.* 2013;14:293.
26. Liu C, Marioni RE, Hedman AK, et al. A DNA methylation biomarker of alcohol consumption. *Mol Psychiatry.* 2018;23(2):422-433.
27. Rimm EB, Giovannucci EL, Stampfer MJ, Colditz GA, Litin LB, Willett WC. Reproducibility and validity of an expanded self-administered semiquantitative food frequency questionnaire among male health professionals. *Am J Epidemiol.* 1992;135(10):1114-1126; discussion 1127-1136.
28. Kannel WB, Belanger A, D'Agostino R, Israel I. Physical activity and physical demand on the job and risk of cardiovascular disease and death: the Framingham Study. *Am Heart J.* 1986;112(4):820-825.
29. Houseman EA, Accomando WP, Koestler DC, et al. DNA methylation arrays as surrogate measures of cell mixture distribution. *BMC Bioinformatics.* 2012;13:86.

30. Maksimovic J, Gordon L, Oshlack A. SWAN: Subset-quantile within array normalization for illumina infinium HumanMethylation450 BeadChips. *Genome Biol.* 2012;13(6):R44.
31. Stevens J, Metcalf PA, Dennis BH, Tell GS, Shimakawa T, Folsom AR. Reliability of a food frequency questionnaire by ethnicity, gender, age and education. *Nutrition Research.* 1996;16:735-745.
32. Corella D, Arnett DK, Tsai MY, et al. The -256T>C polymorphism in the apolipoprotein A-II gene promoter is associated with body mass index and food intake in the genetics of lipid lowering drugs and diet network study. *Clin Chem.* 2007;53(6):1144-1152.
33. Irvin MR, Kabagambe EK, Tiwari HK, et al. Apolipoprotein E polymorphisms and postprandial triglyceridemia before and after fenofibrate treatment in the Genetics of Lipid Lowering and Diet Network (GOLDN) Study. *Circ Cardiovasc Genet.* 2010;3(5):462-467.
34. Absher DM, Li X, Waite LL, et al. Genome-wide DNA methylation analysis of systemic lupus erythematosus reveals persistent hypomethylation of interferon genes and compositional changes to CD4+ T-cell populations. *PLoS Genet.* 2013;9(8):e1003678.
35. Aslibekyan S, Demerath EW, Mendelson M, et al. Epigenome-wide study identifies novel methylation loci associated with body mass index and waist circumference. *Obesity (Silver Spring).* 2015;23(7):1493-1501.
36. Johnson WE, Li C, Rabinovic A. Adjusting batch effects in microarray expression data using empirical Bayes methods. *Biostatistics.* 2007;8(1):118-127.
37. Liu Y, Aryee MJ, Padyukov L, et al. Epigenome-wide association data implicate DNA methylation as an intermediary of genetic risk in rheumatoid arthritis. *Nat Biotechnol.* 2013;31(2):142-147.
38. Abbas AR, Baldwin D, Ma Y, et al. Immune response in silico (IRIS): immune-specific genes identified from a compendium of microarray expression data. *Genes Immun.* 2005;6(4):319-331.
39. Mayer-Davis EJ, Vitolins MZ, Carmichael SL, et al. Validity and reproducibility of a food frequency interview in a Multi-Cultural Epidemiology Study. *Ann Epidemiol.* 1999;9(5):314-324.

40. Hu T, Jacobs DR, Bazzano LA, Bertoni AG, Steffen LM. Low-carbohydrate diets and prevalence, incidence and progression of coronary artery calcium in the Multi-Ethnic Study of Atherosclerosis (MESA). *Br J Nutr*. 2019:1-8.
41. Bertoni AG, Whitt-Glover MC, Chung H, et al. The association between physical activity and subclinical atherosclerosis: the Multi-Ethnic Study of Atherosclerosis. *Am J Epidemiol*. 2009;169(4):444-454.
42. Touleimat N, Tost J. Complete pipeline for Infinium((R)) Human Methylation 450K BeadChip data processing using subset quantile normalization for accurate DNA methylation estimation. *Epigenomics*. 2012;4(3):325-341.
43. Feunekes GI, Van Staveren WA, De Vries JH, Burema J, Hautvast JG. Relative and biomarker-based validity of a food-frequency questionnaire estimating intake of fats and cholesterol. *Am J Clin Nutr*. 1993;58(4):489-496.
44. Caspersen CJ, Bloemberg BP, Saris WH, Merritt RK, Kromhout D. The prevalence of selected physical activities and their relation with coronary heart disease risk factors in elderly men: the Zutphen Study, 1985. *Am J Epidemiol*. 1991;133(11):1078-1092.
45. Stel VS, Smit JH, Pluijm SM, Visser M, Deeg DJ, Lips P. Comparison of the LASA Physical Activity Questionnaire with a 7-day diary and pedometer. *J Clin Epidemiol*. 2004;57(3):252-258.
46. Aryee MJ, Jaffe AE, Corrada-Bravo H, et al. Minfi: a flexible and comprehensive Bioconductor package for the analysis of Infinium DNA methylation microarrays. *Bioinformatics*. 2014;30(10):1363-1369.
47. Chen YA, Lemire M, Choufani S, et al. Discovery of cross-reactive probes and polymorphic CpGs in the Illumina Infinium HumanMethylation450 microarray. *Epigenetics*. 2013;8(2):203-209.
48. Barfield RT, Almli LM, Kilaru V, et al. Accounting for population stratification in DNA methylation studies. *Genet Epidemiol*. 2014;38(3):231-241.

49. Anderson GL, Manson J, Wallace R, et al. Implementation of the Women's Health Initiative study design. *Ann Epidemiol.* 2003;13(9 Suppl):S5-17.
50. Design of the Women's Health Initiative clinical trial and observational study. The Women's Health Initiative Study Group. *Control Clin Trials.* 1998;19(1):61-109.
51. Teschendorff AE, Marabita F, Lechner M, et al. A beta-mixture quantile normalization method for correcting probe design bias in Illumina Infinium 450 k DNA methylation data. *Bioinformatics.* 2013;29(2):189-196.
52. Johnson WE, Li C, Rabinovic A. Adjusting batch effects in microarray expression data using empirical Bayes methods. *Biostatistics.* 2007;8(1):118-127.

Supplemental Table 1. Discovery and Replication analysis using MDS in EA participants

| CpG        | CHR | BP        | Gene   | Discovery |        |         | Replication |        |          | Replicated |
|------------|-----|-----------|--------|-----------|--------|---------|-------------|--------|----------|------------|
|            |     |           |        | Beta      | SE     | P       | Beta        | SE     | P        |            |
| cg01940273 | 2   | 233284934 |        | 0.0055    | 0.0010 | 1.2E-07 | 0.0044      | 0.0009 | 2.12E-06 | YES        |
| cg06126421 | 6   | 30720080  |        | 0.0064    | 0.0012 | 2.7E-07 | 0.0075      | 0.0025 | 0.002    | YES        |
| cg05575921 | 5   | 373378    | AHRR   | 0.0115    | 0.0016 | 1.7E-13 | 0.0107      | 0.0035 | 0.002    | YES        |
| cg26703534 | 5   | 377358    | AHRR   | 0.0031    | 0.0006 | 1.5E-06 | 0.0016      | 0.0006 | 0.008    | NO         |
| cg21161138 | 5   | 399360    | AHRR   | 0.0036    | 0.0007 | 4.2E-07 | 0.0033      | 0.0013 | 0.009    | NO         |
| cg24859433 | 6   | 30720203  |        | 0.0028    | 0.0005 | 7.9E-08 | 0.0026      | 0.0010 | 0.01     | NO         |
| cg03636183 | 19  | 17000585  | F2RL3  | 0.0068    | 0.0011 | 7.4E-10 | 0.0051      | 0.0021 | 0.01     | NO         |
| cg03084350 | 3   | 38065265  | PLCD1  | -0.0023   | 0.0004 | 8.2E-08 | -0.0010     | 0.0004 | 0.03     | NO         |
| cg22185977 | 5   | 1518133   | LPCAT1 | -0.0046   | 0.0009 | 2.3E-07 | -0.0042     | 0.0020 | 0.03     | NO         |
| cg19859270 | 3   | 98251294  | GPR15  | 0.0023    | 0.0004 | 1.5E-08 | 0.0009      | 0.0006 | 0.12     | NO         |
| cg20761853 | 17  | 76850198  | TIMP2  | -0.0033   | 0.0007 | 8.5E-07 | -0.0006     | 0.0007 | 0.34     | NO         |
| cg16755922 | 17  | 80536214  | FOXK2  | -0.0053   | 0.0009 | 7.8E-09 | -0.0002     | 0.0004 | 0.54     | NO         |
| cg26897297 | 13  | 49796434  | MLNR   | -0.0039   | 0.0008 | 6.2E-07 | 0.0002      | 0.0004 | 0.70     | NO         |

MDS: Mediterranean-style diet score; EA: European ancestry; Genome build 37.

Supplemental Table 2. Significant CpGs (FDR < 0.05) in meta-analysis of association between MDS and DNA methylation in European Ancestry (EA) participants

| CpG        | CHR | BP        | Gene           | Meta-analysis |        |         |           | Discovery |        |         | Replication |        |         | Internal validation |
|------------|-----|-----------|----------------|---------------|--------|---------|-----------|-----------|--------|---------|-------------|--------|---------|---------------------|
|            |     |           |                | Beta          | SE     | P       | I_squared | Beta      | SE     | P       | Beta        | SE     | P       |                     |
| cg01940273 | 2   | 233284934 |                | 0.0048        | 0.0007 | 1.6E-12 | 0         | 0.0055    | 0.0010 | 1.2E-07 | 0.0044      | 0.0009 | 2.1E-06 | Yes                 |
| cg18181703 | 17  | 76354621  | SOCS3          | 0.0035        | 0.0006 | 3.5E-10 | 0         | 0.0035    | 0.0008 | 1.0E-05 | 0.0035      | 0.0008 | 8.0E-06 | Yes                 |
| cg08732950 | 16  | 89023389  | CBFA2T3        | -0.0027       | 0.0005 | 2.8E-08 | 0         | -0.0022   | 0.0007 | 2.1E-03 | -0.0032     | 0.0007 | 2.4E-06 | Yes                 |
| cg05951221 | 2   | 233284402 |                | 0.0048        | 0.0009 | 3.2E-08 | 0.07      | 0.0049    | 0.0011 | 1.8E-05 | 0.0050      | 0.0014 | 5.0E-04 | Yes                 |
| cg02097604 | 17  | 17750910  | TOM1L2         | 0.0018        | 0.0003 | 3.6E-08 | 0         | 0.0022    | 0.0005 | 4.8E-06 | 0.0015      | 0.0005 | 1.1E-03 | Yes                 |
| cg12075928 | 8   | 141801307 | PTK2           | 0.0032        | 0.0006 | 1.1E-07 | 0         | 0.0035    | 0.0008 | 3.7E-05 | 0.0029      | 0.0009 | 7.0E-04 | Yes                 |
| cg25189904 | 1   | 68299493  | GNG12          | 0.0051        | 0.0010 | 2.5E-07 | 0         | 0.0044    | 0.0013 | 1.1E-03 | 0.0059      | 0.0014 | 4.7E-05 | Yes                 |
| cg19693031 | 1   | 145441552 | TXNIP          | 0.0034        | 0.0007 | 3.1E-07 | 0.14      | 0.0030    | 0.0009 | 5.3E-04 | 0.0037      | 0.0010 | 1.8E-04 | Yes                 |
| cg02079413 | 11  | 2986505   | SNORA54;NAP1L4 | -0.0020       | 0.0004 | 3.1E-07 | 0.14      | -0.0026   | 0.0007 | 7.1E-05 | -0.0018     | 0.0005 | 1.4E-04 | Yes                 |
| cg04885881 | 1   | 11123118  |                | 0.0036        | 0.0007 | 3.2E-07 | 0.12      | 0.0028    | 0.0009 | 2.1E-03 | 0.0043      | 0.0009 | 4.5E-06 | Yes                 |
| cg02716826 | 9   | 33447032  | SUGT1P1;AQP3   | 0.0023        | 0.0005 | 5.6E-07 | 0         | 0.0020    | 0.0007 | 4.4E-03 | 0.0026      | 0.0006 | 3.0E-05 | Yes                 |
| cg03646329 | 13  | 48987165  | LPAR6;RB1      | 0.0035        | 0.0007 | 1.1E-06 | 0         | 0.0032    | 0.0011 | 2.8E-03 | 0.0038      | 0.0010 | 1.1E-04 | Yes                 |
| cg16969872 | 13  | 79968324  | RBM26          | 0.0034        | 0.0007 | 1.2E-06 | 0.25      | 0.0037    | 0.0008 | 1.8E-06 | 0.0032      | 0.0010 | 2.1E-03 | Yes                 |

Beta/SE: DNA methylation level change according to per-standard deviation change in the Mediterranean-style diet score (MDS) using sex- and age-adjusted model. Position is based on genome build 37. FDR: false discovery rate.

Supplemental Table 3. Discovery and Replication analysis using AHEI in EA participants

| CpG        | CHR | BP        | Gene            | Discovery |        |         | Replication |        |         | Replicated |
|------------|-----|-----------|-----------------|-----------|--------|---------|-------------|--------|---------|------------|
|            |     |           |                 | Beta      | SE     | P       | Beta        | SE     | P       |            |
| cg18181703 | 17  | 76354621  | SOCS3           | 0.0039    | 0.0008 | 4.5E-07 | 0.0037      | 0.0008 | 9.5E-07 | YES        |
| cg16969872 | 13  | 79968324  | RBM26           | 0.0037    | 0.0007 | 6.2E-07 | 0.0026      | 0.0008 | 7.2E-04 | YES        |
| cg02097604 | 17  | 17750910  | TOM1L2          | 0.0024    | 0.0005 | 3.2E-07 | 0.0013      | 0.0004 | 0.001   | NO         |
| cg03450842 | 10  | 80834947  | ZMIZ1           | 0.0025    | 0.0005 | 4.2E-06 | 0.0019      | 0.0006 | 0.002   | NO         |
| cg00277397 | 7   | 71800412  | CALN1           | 0.0033    | 0.0007 | 5.3E-07 | 0.0016      | 0.0005 | 0.003   | NO         |
| cg19693031 | 1   | 145441552 | TXNIP           | 0.0037    | 0.0008 | 6.0E-06 | 0.0023      | 0.0008 | 0.003   | NO         |
| cg15866367 | 13  | 49796387  | MLNR            | -0.0027   | 0.0006 | 1.5E-06 | 0.0009      | 0.0003 | 0.004   | NO         |
| cg22185977 | 5   | 1518133   | LPCAT1          | -0.0044   | 0.0009 | 2.3E-07 | -0.0042     | 0.0016 | 0.007   | NO         |
| cg24859433 | 6   | 30720203  |                 | 0.0030    | 0.0005 | 1.7E-09 | 0.0023      | 0.0009 | 0.01    | NO         |
| cg05575921 | 5   | 373378    | AHRR            | 0.0113    | 0.0015 | 4.7E-14 | 0.0093      | 0.0037 | 0.01    | NO         |
| cg01940273 | 2   | 233284934 |                 | 0.0053    | 0.0010 | 6.4E-08 | 0.0041      | 0.0017 | 0.01    | NO         |
| cg17501210 | 6   | 166970252 | RPS6KA2         | 0.0038    | 0.0008 | 2.7E-06 | 0.0040      | 0.0017 | 0.02    | NO         |
| cg08884571 | 19  | 45901453  | PPP1R13L        | -0.0047   | 0.0010 | 5.0E-06 | -0.0033     | 0.0014 | 0.02    | NO         |
| cg06126421 | 6   | 30720080  |                 | 0.0065    | 0.0012 | 3.5E-08 | 0.0063      | 0.0028 | 0.02    | NO         |
| cg03636183 | 19  | 17000585  | F2RL3           | 0.0072    | 0.0011 | 1.4E-11 | 0.0044      | 0.0023 | 0.05    | NO         |
| cg19157853 | 11  | 126286452 |                 | -0.0019   | 0.0004 | 4.5E-06 | -0.0010     | 0.0006 | 0.08    | NO         |
| cg26703534 | 5   | 377358    | AHRR            | 0.0034    | 0.0006 | 2.8E-08 | 0.0016      | 0.0009 | 0.10    | NO         |
| cg21161138 | 5   | 399360    | AHRR            | 0.0033    | 0.0007 | 1.5E-06 | 0.0030      | 0.0019 | 0.10    | NO         |
| cg15082870 | 7   | 36022841  |                 | -0.0033   | 0.0006 | 1.4E-07 | 0.0006      | 0.0004 | 0.14    | NO         |
| cg10563109 | 6   | 5087749   |                 | -0.0070   | 0.0014 | 4.7E-07 | -0.0021     | 0.0014 | 0.14    | NO         |
| cg15344028 | 2   | 204801510 | ICOS            | 0.0051    | 0.0010 | 3.3E-07 | 0.0018      | 0.0014 | 0.21    | NO         |
| cg15614653 | 2   | 129104464 |                 | 0.0030    | 0.0006 | 3.3E-06 | 0.0005      | 0.0005 | 0.26    | NO         |
| cg25221975 | 3   | 13663444  | FBLN2           | -0.0037   | 0.0008 | 4.3E-06 | -0.0016     | 0.0015 | 0.28    | NO         |
| cg01487683 | 6   | 5031084   |                 | -0.0030   | 0.0006 | 3.8E-07 | -0.0008     | 0.0008 | 0.31    | NO         |
| cg05304729 | 1   | 158800024 | MNDA            | -0.0039   | 0.0009 | 4.5E-06 | -0.0013     | 0.0014 | 0.35    | NO         |
| cg18315935 | 1   | 45120295  | TMEM53          | -0.0025   | 0.0005 | 1.5E-06 | 0.0003      | 0.0003 | 0.41    | NO         |
| cg07069844 | 19  | 1617027   | TCF3            | -0.0020   | 0.0004 | 5.0E-06 | -0.0008     | 0.0009 | 0.41    | NO         |
| cg00826902 | 1   | 3563954   | WDR8            | -0.0032   | 0.0007 | 1.6E-06 | -0.0003     | 0.0004 | 0.42    | NO         |
| cg03084350 | 3   | 38065265  | PLCD1           | -0.0019   | 0.0004 | 4.7E-06 | -0.0005     | 0.0007 | 0.44    | NO         |
| cg10639435 | 8   | 146104221 | ZNF250          | -0.0036   | 0.0007 | 7.0E-07 | -0.0008     | 0.0012 | 0.49    | NO         |
| cg11092486 | 6   | 5087604   |                 | -0.0069   | 0.0014 | 1.6E-06 | -0.0010     | 0.0016 | 0.54    | NO         |
| cg16755922 | 17  | 80536214  | FOXK2           | -0.0054   | 0.0009 | 3.6E-10 | 0.0002      | 0.0004 | 0.68    | NO         |
| cg00994936 | 19  | 1423902   | DAZAP1          | -0.0030   | 0.0006 | 1.0E-06 | 0.0001      | 0.0002 | 0.71    | NO         |
| cg11183227 | 15  | 91455407  | MAN2A2          | -0.0031   | 0.0006 | 1.6E-06 | -0.0002     | 0.0006 | 0.73    | NO         |
| cg20761853 | 17  | 76850198  | TIMP2           | -0.0037   | 0.0007 | 1.6E-08 | -0.0001     | 0.0004 | 0.75    | NO         |
| cg03440556 | 10  | 102107757 | SCD             | 0.0053    | 0.0010 | 4.1E-07 | 0.0004      | 0.0013 | 0.76    | NO         |
| cg09273716 | 20  | 35494835  |                 | -0.0029   | 0.0006 | 1.6E-06 | -0.0002     | 0.0008 | 0.83    | NO         |
| cg16805291 | 7   | 36022575  |                 | -0.0035   | 0.0008 | 6.0E-06 | -0.0002     | 0.0011 | 0.86    | NO         |
| cg18518074 | 11  | 64642316  | EHD1            | -0.0027   | 0.0006 | 2.3E-06 | -0.0001     | 0.0008 | 0.87    | NO         |
| cg03294424 | 8   | 127866047 |                 | -0.0037   | 0.0007 | 4.9E-07 | 0.0001      | 0.0013 | 0.97    | NO         |
| cg26002437 | 10  | 45473231  | C10orf10;RASSF4 | 0.0021    | 0.0004 | 2.3E-06 | 0.0000      | 0.0003 | 0.97    | NO         |

AHEI: Alternative Healthy Eating Index ; EA: European ancestry; position is based on genome build 37.

Supplemental Table 4. Significant CpGs (FDR < 0.05) in meta-analysis of association between AHEI and DNA methylation in European Ancestry (EA) participants

| CpG        | CHR | BP        | Gene      | Meta-analysis |        |         |          | Discovery |        |         | Replication |        |         | Internal validation |
|------------|-----|-----------|-----------|---------------|--------|---------|----------|-----------|--------|---------|-------------|--------|---------|---------------------|
|            |     |           |           | Beta          | SE     | P       | I_square | Beta      | SE     | P       | Beta        | SE     | P       |                     |
| cg18181703 | 17  | 76354621  | SOCS3     | 0.0038        | 0.0005 | 2.0E-12 | 0        | 0.0039    | 0.0008 | 4.5E-07 | 0.0037      | 0.0008 | 9.5E-07 | YES                 |
| cg16969872 | 13  | 79968324  | RBM26     | 0.0032        | 0.0005 | 3.0E-09 | 0        | 0.0037    | 0.0008 | 6.2E-07 | 0.0026      | 0.0008 | 7.2E-04 | YES                 |
| cg27118035 | 16  | 31891978  | ZNF267    | -0.0028       | 0.0005 | 4.9E-09 | 0        | -0.0025   | 0.0006 | 7.8E-05 | -0.0031     | 0.0007 | 1.3E-05 | YES                 |
| cg02097604 | 17  | 17750910  | TOM1L2    | 0.0018        | 0.0003 | 6.6E-09 | 0        | 0.0024    | 0.0005 | 3.2E-07 | 0.0013      | 0.0004 | 1.3E-03 | YES                 |
| cg25953130 | 10  | 63753550  | ARID5B    | 0.0044        | 0.0008 | 1.2E-08 | 0        | 0.0045    | 0.0011 | 3.6E-05 | 0.0042      | 0.0011 | 1.9E-04 | YES                 |
| cg16936953 | 17  | 57915665  | VMP1      | 0.0042        | 0.0007 | 1.5E-08 | 0        | 0.0043    | 0.0011 | 1.2E-04 | 0.0040      | 0.0010 | 3.3E-05 | YES                 |
| cg05232694 | 20  | 48809539  |           | 0.0037        | 0.0007 | 3.1E-08 | 0        | 0.0039    | 0.0009 | 4.4E-05 | 0.0037      | 0.0011 | 6.5E-04 | YES                 |
| cg20842915 | 7   | 39665132  | RALA      | 0.0029        | 0.0005 | 8.1E-08 | 0        | 0.0037    | 0.0010 | 9.2E-05 | 0.0025      | 0.0007 | 1.4E-04 | YES                 |
| cg03190891 | 10  | 97201172  | SORBS1    | -0.0025       | 0.0005 | 9.0E-08 | 0        | -0.0031   | 0.0007 | 3.6E-05 | -0.0021     | 0.0006 | 4.2E-04 | YES                 |
| cg08884571 | 19  | 45901453  | PPP1R13L  | -0.0042       | 0.0008 | 4.6E-07 | 0        | -0.0047   | 0.0010 | 5.0E-06 | -0.0033     | 0.0014 | 2.1E-02 | YES                 |
| cg25909064 | 11  | 120082805 | OAF       | 0.0018        | 0.0004 | 8.0E-07 | 0        | 0.0023    | 0.0006 | 3.2E-04 | 0.0016      | 0.0005 | 4.7E-04 | YES                 |
| cg24694018 | 1   | 145457621 | POLR3GL   | 0.0017        | 0.0003 | 8.3E-07 | 0        | 0.0017    | 0.0005 | 1.2E-03 | 0.0017      | 0.0005 | 2.0E-04 | YES                 |
| cg19202384 | 17  | 79894511  | PYCR1     | 0.0019        | 0.0004 | 9.9E-07 | 0.04     | 0.0023    | 0.0007 | 6.7E-04 | 0.0018      | 0.0006 | 7.2E-04 | YES                 |
| cg27039118 | 8   | 116575902 | TRPS1     | 0.0036        | 0.0007 | 1.2E-06 | 0        | 0.0046    | 0.0011 | 5.6E-05 | 0.0029      | 0.0010 | 3.2E-03 | YES                 |
| cg13074055 | 14  | 106329206 |           | 0.0047        | 0.0010 | 1.3E-06 | 0        | 0.0054    | 0.0015 | 2.1E-04 | 0.0042      | 0.0013 | 1.5E-03 | YES                 |
| cg01294327 | 19  | 2291373   | LINGO3    | 0.0049        | 0.0010 | 1.4E-06 | 0        | 0.0051    | 0.0015 | 6.0E-04 | 0.0047      | 0.0014 | 6.9E-04 | YES                 |
| cg11468085 | 11  | 67435577  | ALDH3B2   | -0.0022       | 0.0005 | 1.4E-06 | 0.06     | -0.0024   | 0.0007 | 3.9E-04 | -0.0022     | 0.0007 | 1.8E-03 | YES                 |
| cg11250194 | 11  | 61601937  | FADS2     | 0.0025        | 0.0005 | 1.5E-06 | 0        | 0.0026    | 0.0007 | 1.9E-04 | 0.0024      | 0.0008 | 2.4E-03 | YES                 |
| cg03646329 | 13  | 48987165  | LPAR6;RB1 | 0.0034        | 0.0007 | 1.5E-06 | 0        | 0.0040    | 0.0010 | 1.2E-04 | 0.0029      | 0.0010 | 2.8E-03 | YES                 |
| cg24735226 | 1   | 65096537  | CACHD1    | -0.0037       | 0.0008 | 1.6E-06 | 0        | -0.0031   | 0.0011 | 5.2E-03 | -0.0041     | 0.0010 | 7.9E-05 | YES                 |
| cg02959282 | 3   | 136667373 | NCK1      | 0.0024        | 0.0005 | 1.8E-06 | 0        | 0.0019    | 0.0010 | 6.0E-02 | 0.0026      | 0.0006 | 9.9E-06 | NO                  |
| cg19157853 | 11  | 126286452 |           | -0.0016       | 0.0003 | 2.3E-06 | 0        | -0.0019   | 0.0004 | 4.5E-06 | -0.0010     | 0.0006 | 8.2E-02 | NO                  |
| cg26470501 | 19  | 45252955  | BCL3      | 0.0019        | 0.0004 | 2.4E-06 | 0.03     | 0.0020    | 0.0006 | 5.0E-04 | 0.0020      | 0.0007 | 3.6E-03 | YES                 |
| cg02508743 | 8   | 56903623  | LYN       | -0.0024       | 0.0005 | 2.5E-06 | 0        | -0.0022   | 0.0008 | 4.4E-03 | -0.0026     | 0.0008 | 9.8E-04 | YES                 |
| cg09940677 | 14  | 103415458 | CDC42BPB  | -0.0014       | 0.0003 | 2.9E-06 | 0        | -0.0014   | 0.0004 | 6.6E-04 | -0.0014     | 0.0004 | 1.4E-03 | YES                 |
| cg07805029 | 1   | 92953256  | GFI1      | 0.0027        | 0.0006 | 3.1E-06 | 0        | 0.0018    | 0.0009 | 4.8E-02 | 0.0032      | 0.0007 | 1.2E-05 | YES                 |

Beta/SE: DNA methylation level change according to per-standard deviation change in the Alternative Healthy Eating Index (AHEI) using sex- and age-adjusted model. Position is based on genome build 37. FDR: false discovery rate.



Supplemental Table 5. Paired Pearson correlation coefficients of 30 diet associated CpGs in EA participants

| CHR | BP        | CpG        | cg04885881 | cg24735226 | cg07805029 | cg19693031 | cg24694018 | cg01940273 | cg20842915 | cg02508743 | cg27039118 | cg02716826 | cg25953130 | cg03190891 | cg02079413 | cg11250194 | cg11468085 | cg25909064 | cg03646329 | cg16969872 | cg09940677 | cg13074055 | cg27118035 | cg08732950 | cg02097604 | cg16936953 | cg18181703 | cg19202384 | cg01294327 | cg26470501 | cg08884571 | cg05232694 |  |  |  |  |
|-----|-----------|------------|------------|------------|------------|------------|------------|------------|------------|------------|------------|------------|------------|------------|------------|------------|------------|------------|------------|------------|------------|------------|------------|------------|------------|------------|------------|------------|------------|------------|------------|------------|--|--|--|--|
| 1   | 11123118  | cg04885881 | 1.00       |            |            |            |            |            |            |            |            |            |            |            |            |            |            |            |            |            |            |            |            |            |            |            |            |            |            |            |            |            |  |  |  |  |
| 1   | 65096537  | cg24735226 | 0.14       | 1.00       |            |            |            |            |            |            |            |            |            |            |            |            |            |            |            |            |            |            |            |            |            |            |            |            |            |            |            |            |  |  |  |  |
| 1   | 92953256  | cg07805029 | 0.02       | -0.23      | 1.00       |            |            |            |            |            |            |            |            |            |            |            |            |            |            |            |            |            |            |            |            |            |            |            |            |            |            |            |  |  |  |  |
| 1   | 145441552 | cg19693031 | 0.17       | 0.16       | 0.00       | 1.00       |            |            |            |            |            |            |            |            |            |            |            |            |            |            |            |            |            |            |            |            |            |            |            |            |            |            |  |  |  |  |
| 1   | 145457621 | cg24694018 | 0.23       | -0.06      | 0.30       | 0.23       | 1.00       |            |            |            |            |            |            |            |            |            |            |            |            |            |            |            |            |            |            |            |            |            |            |            |            |            |  |  |  |  |
| 2   | 233284934 | cg01940273 | 0.34       | -0.09      | 0.13       | 0.13       | 0.34       | 1.00       |            |            |            |            |            |            |            |            |            |            |            |            |            |            |            |            |            |            |            |            |            |            |            |            |  |  |  |  |
| 7   | 39665132  | cg20842915 | -0.15      | -0.24      | 0.34       | -0.08      | 0.19       | 0.19       | 1.00       |            |            |            |            |            |            |            |            |            |            |            |            |            |            |            |            |            |            |            |            |            |            |            |  |  |  |  |
| 8   | 56903623  | cg02508743 | 0.16       | 0.27       | 0.05       | 0.23       | 0.02       | -0.16      | -0.24      | 1.00       |            |            |            |            |            |            |            |            |            |            |            |            |            |            |            |            |            |            |            |            |            |            |  |  |  |  |
| 8   | 116575902 | cg27039118 | 0.33       | 0.13       | 0.14       | 0.18       | 0.38       | 0.20       | 0.12       | 0.18       | 1.00       |            |            |            |            |            |            |            |            |            |            |            |            |            |            |            |            |            |            |            |            |            |  |  |  |  |
| 9   | 33447032  | cg02716826 | 0.56       | 0.32       | -0.15      | 0.17       | 0.17       | 0.18       | -0.18      | 0.22       | 0.30       | 1.00       |            |            |            |            |            |            |            |            |            |            |            |            |            |            |            |            |            |            |            |            |  |  |  |  |
| 10  | 63753550  | cg25953130 | 0.30       | 0.18       | -0.06      | 0.08       | 0.19       | 0.25       | 0.13       | -0.01      | 0.35       | 0.43       | 1.00       |            |            |            |            |            |            |            |            |            |            |            |            |            |            |            |            |            |            |            |  |  |  |  |
| 10  | 97201172  | cg03190891 | 0.25       | 0.50       | -0.34      | 0.16       | -0.19      | -0.22      | -0.40      | 0.45       | 0.09       | 0.41       | 0.15       | 1.00       |            |            |            |            |            |            |            |            |            |            |            |            |            |            |            |            |            |            |  |  |  |  |
| 11  | 2986505   | cg02079413 | -0.02      | -0.11      | 0.33       | 0.09       | 0.22       | 0.10       | 0.11       | 0.12       | 0.07       | -0.19      | -0.09      | -0.18      | 1.00       |            |            |            |            |            |            |            |            |            |            |            |            |            |            |            |            |            |  |  |  |  |
| 11  | 61601937  | cg11250194 | 0.23       | -0.05      | 0.35       | 0.19       | 0.41       | 0.19       | 0.06       | 0.17       | 0.19       | 0.12       | -0.05      | -0.09      | 0.22       | 1.00       |            |            |            |            |            |            |            |            |            |            |            |            |            |            |            |            |  |  |  |  |
| 11  | 67435577  | cg11468085 | 0.16       | 0.36       | -0.47      | 0.00       | -0.31      | -0.17      | -0.34      | 0.25       | 0.00       | 0.34       | 0.29       | 0.56       | -0.26      | -0.35      | 1.00       |            |            |            |            |            |            |            |            |            |            |            |            |            |            |            |  |  |  |  |
| 11  | 120082805 | cg25909064 | 0.20       | -0.11      | 0.30       | 0.13       | 0.53       | 0.40       | 0.29       | -0.13      | 0.26       | 0.07       | 0.14       | -0.28      | 0.25       | 0.35       | -0.33      | 1.00       |            |            |            |            |            |            |            |            |            |            |            |            |            |            |  |  |  |  |
| 13  | 48987165  | cg03646329 | 0.01       | 0.21       | -0.22      | -0.03      | -0.17      | 0.07       | 0.07       | -0.06      | 0.05       | 0.28       | 0.42       | 0.22       | -0.22      | -0.27      | 0.35       | -0.10      | 1.00       |            |            |            |            |            |            |            |            |            |            |            |            |            |  |  |  |  |
| 13  | 79968324  | cg16969872 | 0.14       | 0.26       | -0.29      | 0.13       | 0.03       | 0.12       | -0.12      | 0.16       | 0.17       | 0.34       | 0.30       | 0.28       | -0.18      | -0.13      | 0.36       | -0.07      | 0.26       | 1.00       |            |            |            |            |            |            |            |            |            |            |            |            |  |  |  |  |
| 14  | 103415458 | cg09940677 | 0.02       | 0.25       | -0.14      | 0.12       | -0.06      | -0.18      | -0.19      | 0.46       | 0.07       | 0.14       | 0.06       | 0.41       | 0.03       | -0.04      | 0.46       | -0.18      | 0.08       | 0.17       | 1.00       |            |            |            |            |            |            |            |            |            |            |            |  |  |  |  |
| 14  | 106329206 | cg13074055 | 0.07       | 0.04       | 0.13       | 0.07       | 0.25       | 0.17       | 0.13       | 0.11       | 0.27       | 0.10       | 0.22       | 0.00       | 0.09       | 0.07       | -0.02      | 0.14       | 0.05       | 0.15       | 0.07       | 1.00       |            |            |            |            |            |            |            |            |            |            |  |  |  |  |
| 16  | 31891978  | cg27118035 | 0.11       | 0.29       | -0.21      | 0.05       | -0.29      | -0.23      | -0.26      | 0.26       | -0.05      | 0.17       | 0.03       | 0.49       | -0.11      | -0.12      | 0.36       | -0.27      | 0.15       | 0.13       | 0.27       | -0.09      | 1.00       |            |            |            |            |            |            |            |            |            |  |  |  |  |
| 16  | 89023389  | cg08732950 | 0.17       | 0.19       | 0.02       | 0.24       | 0.07       | 0.02       | -0.09      | 0.23       | 0.10       | 0.19       | 0.06       | 0.21       | 0.07       | 0.17       | 0.09       | 0.13       | -0.04      | 0.08       | 0.21       | 0.02       | 0.14       | 1.00       |            |            |            |            |            |            |            |            |  |  |  |  |
| 17  | 17750910  | cg02097604 | 0.38       | 0.14       | 0.17       | 0.18       | 0.42       | 0.24       | 0.10       | 0.10       | 0.35       | 0.40       | 0.27       | 0.14       | 0.11       | 0.36       | -0.08      | 0.48       | 0.03       | 0.14       | 0.03       | 0.19       | -0.01      | 0.24       | 1.00       |            |            |            |            |            |            |            |  |  |  |  |
| 17  | 57915665  | cg16936953 | 0.39       | 0.31       | -0.28      | 0.10       | -0.03      | 0.05       | -0.22      | 0.19       | 0.18       | 0.66       | 0.37       | 0.46       | -0.22      | -0.04      | 0.43       | -0.07      | 0.33       | 0.38       | 0.14       | 0.07       | 0.20       | 0.08       | 0.25       | 1.00       |            |            |            |            |            |            |  |  |  |  |
| 17  | 76354621  | cg18181703 | 0.51       | 0.19       | -0.03      | 0.16       | 0.37       | 0.37       | -0.03      | 0.06       | 0.35       | 0.66       | 0.40       | 0.18       | -0.06      | 0.17       | 0.10       | 0.31       | 0.17       | 0.29       | -0.03      | 0.16       | -0.02      | 0.16       | 0.51       | 0.52       | 1.00       |            |            |            |            |            |  |  |  |  |
| 17  | 79894511  | cg19202384 | 0.11       | -0.19      | 0.22       | 0.04       | 0.32       | 0.42       | 0.34       | -0.26      | 0.12       | 0.02       | 0.21       | -0.35      | 0.16       | 0.14       | -0.26      | 0.54       | 0.05       | -0.05      | -0.19      | 0.14       | -0.28      | 0.06       | 0.29       | -0.09      | 0.26       | 1.00       |            |            |            |            |  |  |  |  |
| 19  | 2291373   | cg01294327 | 0.20       | 0.04       | 0.06       | 0.02       | 0.27       | 0.38       | 0.12       | -0.11      | 0.13       | 0.06       | 0.17       | -0.08      | 0.08       | 0.06       | -0.09      | 0.31       | 0.05       | 0.12       | -0.08      | 0.20       | -0.05      | 0.13       | 0.24       | 0.00       | 0.32       | 0.34       | 1.00       |            |            |            |  |  |  |  |
| 19  | 45252955  | cg26470501 | 0.44       | 0.08       | 0.13       | 0.12       | 0.50       | 0.34       | 0.11       | 0.05       | 0.39       | 0.44       | 0.31       | 0.05       | 0.02       | 0.28       | -0.06      | 0.40       | -0.02      | 0.19       | -0.06      | 0.23       | -0.10      | 0.07       | 0.45       | 0.31       | 0.59       | 0.24       | 0.26       | 1.00       |            |            |  |  |  |  |
| 19  | 45901453  | cg08884571 | 0.04       | 0.04       | 0.09       | 0.08       | 0.16       | 0.11       | -0.03      | 0.10       | 0.02       | -0.02      | -0.10      | 0.00       | 0.07       | 0.15       | -0.11      | 0.03       | -0.18      | -0.03      | -0.02      | -0.02      | 0.00       | 0.12       | 0.03       | -0.06      | 0.06       | -0.03      | 0.11       | 0.10       | 1.00       |            |  |  |  |  |
| 20  | 48809539  | cg05232694 | 0.25       | -0.04      | 0.34       | 0.11       | 0.38       | 0.31       | 0.23       | 0.06       | 0.22       | 0.16       | 0.18       | -0.13      | 0.16       | 0.28       | -0.22      | 0.44       | -0.03      | 0.01       | -0.10      | 0.21       | -0.12      | 0.05       | 0.35       | 0.05       | 0.32       | 0.37       | 0.23       | 0.37       | 0.05       | 1.00       |  |  |  |  |

Grey colored region represents CpGs located in the same chromosome; EA: European ancestry; position is based on genome build 37.

Supplemental Table 6. Functional description for protein coding genes annotated to diet-associated CpGs

| CpG        | CHR | Position  | Gene    | Full name                                             | Description                                                                                                                                                                                                                                                                                                                                                                                                                                                                                                                                                                                                                                                                 |
|------------|-----|-----------|---------|-------------------------------------------------------|-----------------------------------------------------------------------------------------------------------------------------------------------------------------------------------------------------------------------------------------------------------------------------------------------------------------------------------------------------------------------------------------------------------------------------------------------------------------------------------------------------------------------------------------------------------------------------------------------------------------------------------------------------------------------------|
| cg24735226 | 1   | 65096537  | CACHD1  | Cache domain containing 1                             | This gene encodes protein cache domain containing 1, which may regulate voltage-dependent calcium channels. Alias name is Von Willebrand Factor Type A And Cache Domain Containing 1.                                                                                                                                                                                                                                                                                                                                                                                                                                                                                       |
| cg07805029 | 1   | 92953256  | GF11    | Growth factor independent 1 transcriptional repressor | This gene encodes a nuclear zinc finger protein that functions as a transcriptional repressor. This protein plays a role in diverse developmental contexts, including hematopoiesis and oncogenesis. It functions as part of a complex along with other cofactors to control histone modifications that lead to silencing of the target gene promoters. Mutations in this gene cause autosomal dominant severe congenital neutropenia, and also dominant nonimmune chronic idiopathic neutropenia of adults, which are heterogeneous hematopoietic disorders that cause predispositions to leukemias and infections.                                                        |
| cg19693031 | 1   | 145441552 | TXNIP   | Thioredoxin interacting protein                       | This gene encodes a thioredoxin-binding protein that is a member of the alpha arrestin protein family. Thioredoxin is a thiol-oxidoreductase that is a major regulator of cellular redox signaling which protects cells from oxidative stress. This protein inhibits the antioxidative function of thioredoxin resulting in the accumulation of reactive oxygen species and cellular stress. This protein also functions as a regulator of cellular metabolism and of endoplasmic reticulum (ER) stress. This protein may also function as a tumor suppressor.                                                                                                              |
| cg24694018 | 1   | 145457621 | POLR3GL | RNA polymerase III subunit G like                     | Among its related pathways are RNA Polymerase III Transcription Initiation and RIG-I/MDA5 mediated induction of IFN-alpha/beta pathways. Gene Ontology (GO) annotations related to this gene include <i>RNA polymerase III activity</i> .                                                                                                                                                                                                                                                                                                                                                                                                                                   |
| cg20842915 | 7   | 39665132  | RALA    | RAS like proto-oncogene A                             | The product of this gene belongs to the small GTPase superfamily, Ras family of proteins. GTP-binding proteins mediate the transmembrane signaling initiated by the occupancy of certain cell surface receptors. This gene encodes a low molecular mass ras-like GTP-binding protein that shares about 50% similarity with other ras proteins                                                                                                                                                                                                                                                                                                                               |
| cg02508743 | 8   | 56903623  | LYN     | LYN proto-oncogene, Src family tyrosine kinase        | This gene encodes a tyrosine protein kinase, which maybe involved in the regulation of mast cell degranulation, and erythroid differentiation.                                                                                                                                                                                                                                                                                                                                                                                                                                                                                                                              |
| cg27039118 | 8   | 116575902 | TRPS1   | Transcriptional repressor GATA binding 1              | This gene encodes a transcription factor that represses GATA-regulated genes and binds to a dynein light chain protein. Binding of the encoded protein to the dynein light chain protein affects binding to GATA consensus sequences and suppresses its transcriptional activity. Defects in this gene are a cause of tricho-rhino-phalangeal syndrome (TRPS) types I-III                                                                                                                                                                                                                                                                                                   |
| cg02716826 | 9   | 33447032  | AQP3    | Aquaporin 3 (Gill blood group)                        | This gene encodes the water channel protein aquaporin 3. Aquaporins are a family of small integral membrane proteins related to the major intrinsic protein, also known as aquaporin 0. Aquaporin 3 is localized at the basal lateral membranes of collecting duct cells in the kidney. In addition to its water channel function, aquaporin 3 has been found to facilitate the transport of nonionic small solutes such as urea and glycerol, but to a smaller degree. It has been suggested that water channels can be functionally heterogeneous and possess water and solute permeation mechanisms.                                                                     |
| cg25953130 | 10  | 63753550  | ARID5B  | AT-rich interaction domain 5B                         | This gene encodes a member of the AT-rich interaction domain (ARID) family of DNA binding proteins. The encoded protein forms a histone H3K9Me2 demethylase complex with PHD finger protein 2 and regulates the transcription of target genes involved in adipogenesis and liver development. This gene also plays a role in cell growth and differentiation of B-lymphocyte progenitors, and single nucleotide polymorphisms in this gene are associated with acute lymphoblastic leukemia.                                                                                                                                                                                |
| cg03190891 | 10  | 97201172  | SORBS1  | Sorbin and SH3 domain containing 1                    | This gene encodes a CBL-associated protein which functions in the signaling and stimulation of insulin. Mutations in this gene may be associated with human disorders of insulin resistance.                                                                                                                                                                                                                                                                                                                                                                                                                                                                                |
| cg02079413 | 11  | 2986505   | NAP1L4  | Nucleosome assembly protein 1 like 4                  | This gene encodes a member of the nucleosome assembly protein (NAP) family which can interact with both core and linker histones. It can shuttle between the cytoplasm and nucleus, suggesting a role as a histone chaperone. This gene is one of several located near the imprinted gene domain of 11p15.5, an important tumor-suppressor gene region. Alterations in this region have been associated with the Beckwith-Wiedemann syndrome, Wilms tumor, rhabdomyosarcoma, adrenocortical carcinoma, and lung, ovarian, and breast cancer.                                                                                                                                |
| cg11250194 | 11  | 61601937  | FADS2   | Fatty acid desaturase 2                               | The protein encoded by this gene is a member of the fatty acid desaturase (FADS) gene family. Desaturase enzymes regulate unsaturation of fatty acids through the introduction of double bonds between defined carbons of the fatty acyl chain. FADS family members are considered fusion products composed of an N-terminal cytochrome b5-like domain and a C-terminal multiple membrane-spanning desaturase portion, both of which are characterized by conserved histidine motifs. This gene is clustered with family members at 11q12-q13.1; this cluster is thought to have arisen evolutionarily from gene duplication based on its similar exon/intron organization. |

Supplemental Table 6. Functional description for protein coding genes annotated to diet-associated CpGs

(continued)

| CpG        | CHR | Position  | Gene     | Full name                                          | Description                                                                                                                                                                                                                                                                                                                                                                                                                                                                                                                                                                                                  |
|------------|-----|-----------|----------|----------------------------------------------------|--------------------------------------------------------------------------------------------------------------------------------------------------------------------------------------------------------------------------------------------------------------------------------------------------------------------------------------------------------------------------------------------------------------------------------------------------------------------------------------------------------------------------------------------------------------------------------------------------------------|
| cg11468085 | 11  | 67435577  | ALDH3B2  | Aldehyde dehydrogenase 3 family member B2          | This gene encodes a member of the aldehyde dehydrogenase family, a group of isozymes that may play a major role in the detoxification of aldehydes generated by alcohol metabolism and lipid peroxidation. The gene of this particular family member is over 10 kb in length. Altered methylation patterns at this locus have been observed in spermatozoa derived from patients exhibiting reduced fecundity.                                                                                                                                                                                               |
| cg25909064 | 11  | 120082805 | OAF      | Out at first homolog                               | Diseases associated with OAF include Chronic Maxillary Sinusitis.                                                                                                                                                                                                                                                                                                                                                                                                                                                                                                                                            |
| cg03646329 | 13  | 48987165  | LPAR6    | Lysophosphatidic acid receptor 6                   | The protein encoded by this gene belongs to the family of G-protein coupled receptors, that are preferentially activated by adenosine and uridine nucleotides. This gene aligns with an internal intron of the retinoblastoma susceptibility gene in the reverse orientation.                                                                                                                                                                                                                                                                                                                                |
|            |     |           | RB1      | RB transcriptional corepressor 1                   | The protein encoded by this gene is a negative regulator of the cell cycle and was the first tumor suppressor gene found. The encoded protein also stabilizes constitutive heterochromatin to maintain the overall chromatin structure. The active, hypophosphorylated form of the protein binds transcription factor E2F1. Defects in this gene are a cause of childhood cancer retinoblastoma (RB), bladder cancer, and osteogenic sarcoma.                                                                                                                                                                |
| cg16969872 | 13  | 79968324  | RBM26    | RNA binding motif protein 26                       | Gene Ontology (GO) annotations related to this gene include <i>nucleic acid binding</i> and <i>nucleotide binding</i> .                                                                                                                                                                                                                                                                                                                                                                                                                                                                                      |
| cg09940677 | 14  | 103415458 | CDC42BPB | CDC42 binding protein kinase beta                  | This gene encodes a member of the serine/threonine protein kinase family. The encoded protein contains a Cdc42/Rac-binding p21 binding domain resembling that of PAK kinase. The kinase domain of this protein is most closely related to that of myotonic dystrophy kinase-related ROK. Studies of the similar gene in rat suggested that this kinase may act as a downstream effector of Cdc42 in cytoskeletal reorganization.                                                                                                                                                                             |
| cg27118035 | 16  | 31891978  | ZNF267   | Zinc finger protein 267                            | Among its related pathways are Gene Expression. Gene Ontology (GO) annotations related to this gene include nucleic acid binding and DNA-binding transcription factor activity.                                                                                                                                                                                                                                                                                                                                                                                                                              |
| cg08732950 | 16  | 89023389  | CBFA2T3  | CBFA2/RUNX1 translocation partner 3                | This gene encodes a member of the myeloid translocation gene family which interact with DNA-bound transcription factors and recruit a range of corepressors to facilitate transcriptional repression. The t(16;21)(q24;q22) translocation is one of the less common karyotypic abnormalities in acute myeloid leukemia. The translocation produces a chimeric gene made up of the 5'-region of the runt-related transcription factor 1 gene fused to the 3'-region of this gene. This gene is also a putative breast tumor suppressor.                                                                       |
| cg02097604 | 17  | 17750910  | TOM1L2   | Target of myb1 like 2 membrane trafficking protein | This gene belongs to a small gene family whose members have an N-terminal VHS domain followed by a GAT domain; domains which typically participate in vesicular trafficking. The canonical protein encoded by this gene also has a C-terminal clathrin binding motif. This protein has been shown to interact with Tollip, clathrin and ubiquitin and is thought to play a role in endosomal sorting. This gene resides in the 3.7 Mb deletion of chromosome region 17p11.2 that is associated with Smith-Magenis syndrome.                                                                                  |
| cg16936953 | 17  | 57915665  | VMP1     | Vacuole membrane protein 1                         | This gene encodes a transmembrane protein that plays a key regulatory role in the process of autophagy. The ectopic overexpression of the encoded protein in cultured cells triggers autophagy even under nutrient-rich conditions. This gene is overexpressed in pancreatitis affected acinar cells where the encoded protein mediates sequestration and degradation of potentially deleterious activated zymogen granules in a process termed, zymophagy.                                                                                                                                                  |
| cg18181703 | 17  | 76354621  | SOCS3    | Suppressor of cytokine signaling 3                 | This gene encodes a member of the STAT-induced STAT inhibitor (SSI), also known as suppressor of cytokine signaling (SOCS), family. SSI family members are cytokine-inducible negative regulators of cytokine signaling. The expression of this gene is induced by various cytokines, including IL6, IL10, and interferon (IFN)-gamma. The protein encoded by this gene can bind to JAK2 kinase, and inhibit the activity of JAK2 kinase. Studies of the mouse counterpart of this gene suggested the roles of this gene in the negative regulation of fetal liver hematopoiesis, and placental development. |
| cg19202384 | 17  | 79894511  | PYCR1    | Pyrraline-5-carboxylate reductase 1                | This gene encodes an enzyme that catalyzes the NAD(P)H-dependent conversion of pyrroline-5-carboxylate to proline. This enzyme may also play a physiologic role in the generation of NADP(+) in some cell types. The protein forms a homopolymer and localizes to the mitochondrion.                                                                                                                                                                                                                                                                                                                         |
| cg01294327 | 19  | 2291373   | LINGO3   | Leucine rich repeat and Ig domain containing 3     |                                                                                                                                                                                                                                                                                                                                                                                                                                                                                                                                                                                                              |

Supplemental Table 6. Functional description for protein coding genes annotated to diet-associated CpGs

(continued)

| CpG        | CHR | Position | Gene     | Full name                                        | Description                                                                                                                                                                                                                                                                                                                                                                                                                                                                                                                                                                           |
|------------|-----|----------|----------|--------------------------------------------------|---------------------------------------------------------------------------------------------------------------------------------------------------------------------------------------------------------------------------------------------------------------------------------------------------------------------------------------------------------------------------------------------------------------------------------------------------------------------------------------------------------------------------------------------------------------------------------------|
| cg26470501 | 19  | 45252955 | BCL3     | BCL3 transcription coactivator                   | This gene is a proto-oncogene candidate. It is identified by its translocation into the immunoglobulin alpha-locus in some cases of B-cell leukemia. The protein encoded by this gene contains seven ankyrin repeats, which are most closely related to those found in I kappa B proteins. This protein functions as a transcriptional co-activator that activates through its association with NF-kappa B homodimers. The expression of this gene can be induced by NF-kappa B, which forms a part of the autoregulatory loop that controls the nuclear residence of p50 NF-kappa B. |
| cg08884571 | 19  | 45901453 | PPP1R13L | Protein phosphatase 1 regulatory subunit 13 like | PPP1R13L is one of the most evolutionarily conserved inhibitors of p53 (TP53; MIM 191170), whereas ASPP1 (MIM 606455) and ASPP2 (MIM 602143) are activators of p53.                                                                                                                                                                                                                                                                                                                                                                                                                   |

Supplemental Table 7. Differential gene expression of annotated genes for the 30 diet-associated CpGs

| Category | Tissue          | N_genes | N_overlap | P       | adjusted P | Genes                                                                                                            |
|----------|-----------------|---------|-----------|---------|------------|------------------------------------------------------------------------------------------------------------------|
| Twoside  | Spleen          | 4334    | 18        | 3.9E-06 | 0.0001     | GFI1,POLR3GL,LYN,TRPS1,AQP3,ARID5B,SORBS1,FADS2,OAF,LPAR6,RBM26,ZNF267,CBFA2T3,TOM1L2,VMP1,LINGO3,BCL3,PPP1R13L  |
| Twoside  | Blood           | 5380    | 18        | 9.8E-05 | 0.003      | GFI1,POLR3GL,RALA,LYN,TRPS1,AQP3,ARID5B,OAF,LPAR6,CDC42BPB,ZNF267,CBFA2T3,TOM1L2,VMP1,SOCS3,LINGO3,BCL3,PPP1R13L |
| Twoside  | Lung            | 2898    | 13        | 1.1E-04 | 0.003      | GFI1,RALA,LYN,AQP3,SORBS1,OAF,LPAR6,ZNF267,CBFA2T3,TOM1L2,VMP1,SOCS3,BCL3                                        |
| Up       | Spleen          | 2993    | 12        | 7.1E-04 | 0.02       | GFI1,POLR3GL,LYN,AQP3,OAF,LPAR6,RBM26,ZNF267,CBFA2T3,VMP1,LINGO3,BCL3                                            |
| Up       | Lung            | 2157    | 10        | 7.9E-04 | 0.02       | GFI1,RALA,LYN,AQP3,LPAR6,ZNF267,CBFA2T3,VMP1,SOCS3,BCL3                                                          |
| Twoside  | Muscle          | 5676    | 17        | 8.5E-04 | 0.03       | CACHD1,POLR3GL,RALA,AQP3,ARID5B,SORBS1,FADS2,OAF,LPAR6,RBM26,CDC42BPB,ZNF267,VMP1,SOCS3,PYCR1,BCL3,PPP1R13L      |
| Up       | Salivary_Gland  | 1113    | 7         | 1.1E-03 | 0.03       | LYN,TRPS1,AQP3,ALDH3B2,LPAR6,PYCR1,PPP1R13L                                                                      |
| Twoside  | Small_Intestine | 3161    | 12        | 1.2E-03 | 0.04       | CACHD1,GFI1,LYN,TRPS1,AQP3,FADS2,OAF,CBFA2T3,TOM1L2,LINGO3,BCL3,PPP1R13L                                         |
| Down     | Testis          | 2284    | 10        | 1.2E-03 | 0.04       | CACHD1,LYN,AQP3,ARID5B,SORBS1,OAF,VMP1,SOCS3,BCL3,PPP1R13L                                                       |

Analysis was performed using GTEX v6 of 30 general tissue types. P was calculated using hypergeometric test through FUMA GWAS platform. Bonferroni correction was used to calculate adjusted P. Genes are annotated genes overlapping with differentially expressed genes in a given category

Supplemental Table 8. Traits associated with *cis*-meQTLs in NHGRI-EBI GWAS catalog

| CpG        | SNP        | cismQTL.P | GWAS.Reported.Gene                                                                                              | GWAS.Reported.Risk.Allele | GWAS.P   | GWAS.Trait                                                          | GWAS.Trait.Description                                                                                        | PUBMD.ID |
|------------|------------|-----------|-----------------------------------------------------------------------------------------------------------------|---------------------------|----------|---------------------------------------------------------------------|---------------------------------------------------------------------------------------------------------------|----------|
| cg11250194 | rs102274   | 2.0E-263  | TMEM258                                                                                                         | rs102274-C                | 8.0E-21  | Serum metabolite concentrations in chronic kidney disease           | (Phosphatidylcholine with diacyl residue sum C36:4)                                                           | 29545352 |
| cg11250194 | rs102275   | 2.1E-255  | TMEM258                                                                                                         | rs102275-C                | 8.0E-17  | Serum metabolite ratios in chronic kidney disease                   | (Phosphatidylcholine with acyl-alkyl residue sum C38:5/Phosphatidylcholine with acyl-alkyl residue sum C44:4) | 29545352 |
| cg11250194 | rs102275   | 2.1E-255  | TMEM258                                                                                                         | rs102275-C                | 3.0E-32  | Serum metabolite concentrations in chronic kidney disease           | (Lysophosphatidylcholine with acyl residue C20:4)                                                             | 29545352 |
| cg11250194 | rs102275   | 2.1E-255  | C11orf0, C11orf9, FADS1, FADS2, FEN1                                                                            | rs102275-T                | 7.0E-13  | Palmitoleic acid (16:1n-7) levels                                   |                                                                                                               | 23362303 |
| cg11250194 | rs102275   | 2.1E-255  | FADS1, FADS2, FADS3                                                                                             | rs102275-?                | 1.0E-203 | Phospholipid levels (plasma)                                        | (levels)                                                                                                      | 22359512 |
| cg11250194 | rs102275   | 2.1E-255  | FTH1, INCENP, FADS1, FADS2, SCGB2A1, SCGB1D1, SCGB2A2, RAB31L1, AHNAK, C11orf9, DAGLA, FEN1, FADS3, SYT7, BEST1 | rs102275-C                | 7.0E-147 | Plasma omega-6 polyunsaturated fatty acid levels (arachidonic acid) | (Conditioned on rs174547)                                                                                     | 24823311 |
| cg11250194 | rs102275   | 2.1E-255  | FADS1, FADS2, FADS3                                                                                             | rs102275-?                | 4.0E-264 | Metabolite levels                                                   |                                                                                                               | 22916037 |
| cg07805029 | rs11810217 | 2.7E-09   | EVI5                                                                                                            | rs11810217-A              | 6.0E-15  | Multiple sclerosis                                                  |                                                                                                               | 21833088 |
| cg11468085 | rs12288023 | 8.3E-13   | ACY3                                                                                                            | rs12288023-C              | 9.0E-16  | Serum metabolite levels                                             | (N-acetylphenylalanine)                                                                                       | 24625756 |
| cg16936953 | rs1292053  | 8.6E-74   | RPS6KB1, TUBD1                                                                                                  | rs1292053-G               | 9.0E-13  | Inflammatory bowel disease                                          |                                                                                                               | 23128233 |
| cg27039118 | rs13271228 | 2.6E-94   | TRPS1                                                                                                           | rs13271228-G              | 2.0E-24  | Monocyte count                                                      |                                                                                                               | 27863252 |
| cg02508743 | rs13273123 | 1.3E-76   | PLAG1                                                                                                           | rs13273123-G              | 1.0E-09  | Height                                                              |                                                                                                               | 19396169 |
| cg11250194 | rs1535     | 8.1E-267  | FADS2                                                                                                           | rs1535-G                  | 3.0E-14  | Serum metabolite ratios in chronic kidney disease                   | (Phosphatidylcholine with acyl-alkyl residue sum C36:3/Hydroxysphingomyelin with acyl residue sum C22:2)      | 29545352 |
| cg11250194 | rs1535     | 8.1E-267  | FADS1, FADS2, FADS3                                                                                             | rs1535-A                  | 5.0E-45  | LDL cholesterol levels                                              | (Trans-ethnic initial)                                                                                        | 28334899 |
| cg11250194 | rs174479   | 4.8E-81   | FADS1, FADS2, FADS3                                                                                             | rs174479-?                | 2.0E-14  | Sphingolipid levels                                                 | (levels)                                                                                                      | 22359512 |
| cg11250194 | rs174528   | 2.5E-225  | MYRF                                                                                                            | rs174528-C                | 9.0E-14  | Serum metabolite ratios in chronic kidney disease                   | (Phosphatidylcholine with diacyl residue sum C34:1/Phosphatidylcholine with diacyl residue sum C40:5)         | 29545352 |
| cg11250194 | rs174530   | 2.0E-227  | MYRF                                                                                                            | rs174530-G                | 2.0E-12  | Serum metabolite ratios in chronic kidney disease                   | (Phosphatidylcholine with diacyl residue sum C32:3/Phosphatidylcholine with diacyl residue sum C34:4)         | 29545352 |
| cg11250194 | rs174533   | 1.6E-260  | MYRF                                                                                                            | rs174533-A                | 5.0E-17  | Serum metabolite ratios in chronic kidney disease                   | (Phosphatidylcholine with acyl-alkyl residue sum C34:2/Phosphatidylcholine with acyl-alkyl residue sum C38:6) | 29545352 |
| cg11250194 | rs174533   | 1.6E-260  | FADS1, FADS2, FADS3                                                                                             | rs174533-A                | 1.0E-09  | LDL cholesterol levels                                              | (Asian initial, BMI unadjusted)                                                                               | 28334899 |
| cg11250194 | rs174533   | 1.6E-260  | MYRF, TMEM258                                                                                                   | rs174533-A                | 4.0E-21  | Red blood cell count                                                |                                                                                                               | 27863252 |
| cg11250194 | rs174535   | 5.4E-261  | FADS1                                                                                                           | rs174535-T                | 3.0E-36  | Blood metabolite levels                                             | (1-linoleoylglycerophosphoethanolamine)                                                                       | 24816252 |
| cg11250194 | rs174536   | 1.8E-261  | FEN1, FADS2, TMEM258, MYRF                                                                                      | rs174536-C                | 2.0E-30  | Resting heart rate                                                  |                                                                                                               | 27798624 |
| cg11250194 | rs174537   | 7.6E-263  | MYRF                                                                                                            | rs174537-T                | 2.0E-19  | Serum metabolite ratios in chronic kidney disease                   | (Phosphatidylcholine with acyl-alkyl residue sum C36:5/Sphingomyelin with acyl residue sum C16:0)             | 29545352 |
| cg11250194 | rs174537   | 7.6E-263  | NR                                                                                                              | rs174537-G                | 9.0E-21  | Colorectal cancer                                                   |                                                                                                               | 26965516 |
| cg11250194 | rs174537   | 7.6E-263  | MYRF                                                                                                            | rs174537-T                | 5.0E-10  | Serum metabolite concentrations in chronic kidney disease           | (Phosphatidylcholine with acyl-alkyl residue sum C38:4)                                                       | 29545352 |
| cg11250194 | rs174538   | 1.5E-273  | FADS1                                                                                                           | rs174538-A                | 9.0E-14  | Blood metabolite levels                                             | (docosapentaenoate (n3 DPA; 22:5n3))                                                                          | 24816252 |
| cg11250194 | rs174541   | 9.8E-254  | FEN1, FADS1                                                                                                     | rs174541-C                | 2.0E-18  | Serum metabolite ratios in chronic kidney disease                   | (Phosphatidylcholine with acyl-alkyl residue sum C36:3/Phosphatidylcholine with acyl-alkyl residue sum C40:5) | 29545352 |
| cg11250194 | rs174545   | 6.0E-265  | FADS1                                                                                                           | rs174545-G                | 7.0E-21  | Serum metabolite ratios in chronic kidney disease                   | (Phosphatidylcholine with acyl-alkyl residue sum C36:3/Phosphatidylcholine with acyl-alkyl residue sum C40:1) | 29545352 |
| cg11250194 | rs174546   | 6.2E-265  | FADS1, FADS2, FADS3                                                                                             | rs174546-T                | 8.0E-28  | HDL cholesterol                                                     |                                                                                                               | 24097068 |
| cg11250194 | rs174546   | 6.2E-265  | FADS1, FADS2, FADS3                                                                                             | rs174546-T                | 3.0E-37  | Cholesterol, total                                                  |                                                                                                               | 24097068 |
| cg11250194 | rs174546   | 6.2E-265  | FADS1, FADS2, FADS3                                                                                             | rs174546-C                | 2.0E-22  | Cholesterol, total                                                  |                                                                                                               | 20686565 |
| cg11250194 | rs174546   | 6.2E-265  | FADS1, FADS2, FADS3                                                                                             | rs174546-T                | 7.0E-38  | Triglycerides                                                       |                                                                                                               | 24097068 |
| cg11250194 | rs174546   | 6.2E-265  | FADS1, FADS2, FADS3                                                                                             | rs174546-T                | 2.0E-22  | HDL cholesterol                                                     |                                                                                                               | 20686565 |
| cg11250194 | rs174546   | 6.2E-265  | FADS1, FADS2, FADS3                                                                                             | rs174546-T                | 2.0E-39  | LDL cholesterol                                                     |                                                                                                               | 24097068 |
| cg11250194 | rs174546   | 6.2E-265  | FADS1, FADS2, FADS3                                                                                             | rs174546-T                | 5.0E-24  | Triglycerides                                                       |                                                                                                               | 20686565 |
| cg11250194 | rs174546   | 6.2E-265  | FADS1, FADS2, FADS3                                                                                             | rs174546-T                | 1.0E-21  | LDL cholesterol                                                     |                                                                                                               | 20686565 |
| cg11250194 | rs174547   | 6.7E-265  | FADS1                                                                                                           | rs174547-C                | 9.0E-116 | Metabolic traits                                                    | (SM-3 + 152 other traits)                                                                                     | 21886157 |
| cg11250194 | rs174548   | 6.1E-311  | FADS1                                                                                                           | rs174548-G                | 5.0E-14  | Triglycerides                                                       |                                                                                                               | 20864672 |
| cg11250194 | rs174548   | 6.1E-311  | FADS1                                                                                                           | rs174548-G                | 5.0E-12  | Serum metabolite ratios in chronic kidney disease                   | (Phosphatidylcholine with acyl-alkyl residue sum C36:3/Phosphatidylcholine with acyl-alkyl residue sum C42:2) | 29545352 |
| cg11250194 | rs174548   | 6.1E-311  | FADS1                                                                                                           | rs174548-G                | 1.0E-12  | HDL cholesterol                                                     |                                                                                                               | 20864672 |
| cg11250194 | rs174548   | 6.1E-311  | FADS1                                                                                                           | rs174548-C                | 1.0E-84  | Blood metabolite levels                                             | (arachidonate (20:4n6))                                                                                       | 24816252 |
| cg11250194 | rs174549   | 3.9E-312  | FADS1                                                                                                           | rs174549-A                | 2.0E-18  | Serum metabolite ratios in chronic kidney disease                   | (Phosphatidylcholine with diacyl residue sum C36:3/Phosphatidylcholine with diacyl residue sum C42:4)         | 29545352 |

Supplemental Table 8. Traits associated with *cis*-meQTLs in NHGRI-EBI GWAS catalog

(continued)

| CpG        | SNP       | cismeQTL.P | GWAS.Reported.Gene                                                                                               | GWAS.Reported.Risk.Allele | GWAS.P   | GWAS.Trait                                                       | GWAS.Trait.Description                                                                                        | PUBMD.ID |
|------------|-----------|------------|------------------------------------------------------------------------------------------------------------------|---------------------------|----------|------------------------------------------------------------------|---------------------------------------------------------------------------------------------------------------|----------|
| cg11250194 | rs174549  | 3.9E-312   | FADS1, FADS2, FADS3, FEN1                                                                                        | rs174549-?                | 1.0E-20  | Laryngeal squamous cell carcinoma                                |                                                                                                               | 25194280 |
| cg11250194 | rs174549  | 3.9E-312   | FADS1                                                                                                            | rs174549-A                | 2.0E-12  | Eosinophil counts                                                |                                                                                                               | 27863252 |
| cg11250194 | rs174550  | 4.9E-265   | FADS1, FADS2, FADS3                                                                                              | rs174550-T                | 6.0E-30  | HDL cholesterol levels                                           | (Trans-ethnic initial)                                                                                        | 28334899 |
| cg11250194 | rs174550  | 4.9E-265   | FADS1                                                                                                            | rs174550-T                | 7.0E-24  | Blood metabolite levels                                          | (adrenate (22:4n6))                                                                                           | 24816252 |
| cg11250194 | rs174550  | 4.9E-265   | FTH1, INCENP, FADS1, FADS2, SCGB1D1, SCGB2A1, C11orf9, DAGLA, FEN1, RAB3L, C11orf10, FADS3, SYT7, BEST1, SCGB1D2 | rs174550-T                | 4.0E-274 | Plasma omega-6 polyunsaturated fatty acid levels (linoleic acid) |                                                                                                               | 24823311 |
| cg11250194 | rs174554  | 1.3E-265   | FADS1                                                                                                            | rs174554-G                | 3.0E-17  | Serum metabolite ratios in chronic kidney disease                | (Phosphatidylcholine with diacyl residue sum C38:3/Phosphatidylcholine with acyl-alkyl residue sum C40:1)     | 29545352 |
| cg11250194 | rs174556  | 3.7E-312   | FADS1                                                                                                            | rs174556-T                | 2.0E-22  | Blood metabolite levels                                          | (eicosapentaenoate (EPA; 20:5n3))                                                                             | 24816252 |
| cg11250194 | rs174560  | 3.0E-311   | FADS1                                                                                                            | rs174560-C                | 4.0E-15  | Serum metabolite ratios in chronic kidney disease                | (Phosphatidylcholine with diacyl residue sum C40:5/Lysophosphatidylcholine with acyl residue C20:3)           | 29545352 |
| cg11250194 | rs174560  | 3.0E-311   | FADS1                                                                                                            | rs174560-C                | 3.0E-10  | Serum metabolite concentrations in chronic kidney disease        | (Phosphatidylcholine with diacyl residue sum C36:3)                                                           | 29545352 |
| cg11250194 | rs174561  | 3.9E-312   | MIR1908                                                                                                          | rs174561-C                | 3.0E-17  | Serum metabolite ratios in chronic kidney disease                | (Phosphatidylcholine with diacyl residue sum C36:3/Phosphatidylcholine with diacyl residue sum C42:1)         | 29545352 |
| cg11250194 | rs174562  | 1.1E-265   | FADS1                                                                                                            | rs174562-G                | 3.0E-22  | Serum metabolite ratios in chronic kidney disease                | (Phosphatidylcholine with diacyl residue sum C36:3/Phosphatidylcholine with acyl-alkyl residue sum C40:5)     | 29545352 |
| cg11250194 | rs174564  | 9.6E-263   | FADS1, FADS2                                                                                                     | rs174564-G                | 3.0E-16  | Serum metabolite ratios in chronic kidney disease                | (Phosphatidylcholine with diacyl residue sum C30:0/Phosphatidylcholine with diacyl residue sum C32:2)         | 29545352 |
| cg11250194 | rs174566  | 4.2E-266   | FADS1, FADS2                                                                                                     | rs174566-G                | 2.0E-22  | Serum metabolite ratios in chronic kidney disease                | (Phosphatidylcholine with diacyl residue sum C36:5/Phosphatidylcholine with acyl-alkyl residue sum C36:2)     | 29545352 |
| cg11250194 | rs174566  | 4.2E-266   | FADS1, FADS2                                                                                                     | rs174566-G                | 5.0E-14  | Serum metabolite concentrations in chronic kidney disease        | (Phosphatidylcholine with diacyl residue sum C36:5)                                                           | 29545352 |
| cg11250194 | rs174566  | 4.2E-266   | FADS1, FADS2, MYRF, FEN1                                                                                         | rs174566-G                | 1.0E-12  | supplement                                                       |                                                                                                               | 29246731 |
| cg11250194 | rs174567  | 6.9E-265   | FADS1, FADS2                                                                                                     | rs174567-G                | 2.0E-13  | Serum metabolite ratios in chronic kidney disease                | (Phosphatidylcholine with acyl-alkyl residue sum C42:5/Phosphatidylcholine with acyl-alkyl residue sum C44:3) | 29545352 |
| cg11250194 | rs174568  | 1.6E-263   | FADS1, FADS2                                                                                                     | rs174568-T                | 3.0E-08  | Serum metabolite concentrations in chronic kidney disease        | (Phosphatidylcholine with diacyl residue sum C34:4)                                                           | 29545352 |
| cg11250194 | rs174568  | 1.6E-263   | FADS1, FADS2                                                                                                     | rs174568-T                | 3.0E-14  | Serum metabolite ratios in chronic kidney disease                | (Phosphatidylcholine with diacyl residue sum C38:0/Phosphatidylcholine with acyl-alkyl residue sum C38:6)     | 29545352 |
| cg11250194 | rs174570  | 9.3E-25    | FADS2, FADS3                                                                                                     | rs174570-G                | 4.0E-13  | LDL cholesterol                                                  |                                                                                                               | 19060911 |
| cg11250194 | rs174570  | 9.3E-25    | FADS2, FADS3                                                                                                     | rs174570-G                | 2.0E-10  | Cholesterol, total                                               |                                                                                                               | 19060911 |
| cg11250194 | rs174574  | 5.1E-262   | FADS2                                                                                                            | rs174574-C                | 1.0E-13  | Serum metabolite ratios in chronic kidney disease                | (Phosphatidylcholine with acyl-alkyl residue sum C36:2/Sphingomyelin with acyl residue sum C16:1)             | 29545352 |
| cg11250194 | rs174576  | 1.3E-265   | FADS2                                                                                                            | rs174576-A                | 1.0E-30  | Serum metabolite ratios in chronic kidney disease                | (Phosphatidylcholine with diacyl residue sum C36:1/Phosphatidylcholine with diacyl residue sum C36:4)         | 29545352 |
| cg11250194 | rs174577  | 5.0E-265   | FADS2                                                                                                            | rs174577-A                | 2.0E-17  | Iron status biomarkers (transferrin levels)                      |                                                                                                               | 25352340 |
| cg11250194 | rs174577  | 5.0E-265   | C11orf9, FADS2                                                                                                   | rs174577-A                | 3.0E-08  | P wave duration                                                  |                                                                                                               | 24850809 |
| cg11250194 | rs174578  | 1.6E-263   | FADS2                                                                                                            | rs174578-A                | 9.0E-18  | Serum metabolite ratios in chronic kidney disease                | (Phosphatidylcholine with diacyl residue sum C36:1/Phosphatidylcholine with acyl-alkyl residue sum C38:5)     | 29545352 |
| cg11250194 | rs174578  | 1.6E-263   | FADS1                                                                                                            | rs174578-A                | 3.0E-24  | Blood metabolite levels                                          | (1-arachidonoylglycerophosphoinositol)                                                                        | 24816252 |
| cg11250194 | rs174580  | 1.1E-262   | FADS2                                                                                                            | rs174580-G                | 2.0E-28  | Serum metabolite ratios in chronic kidney disease                | (Phosphatidylcholine with diacyl residue sum C34:2/Phosphatidylcholine with acyl-alkyl residue sum C38:5)     | 29545352 |
| cg11250194 | rs174581  | 1.3E-262   | FADS2                                                                                                            | rs174581-A                | 3.0E-12  | Serum metabolite ratios in chronic kidney disease                | (Phosphatidylcholine with diacyl residue sum C34:2/Phosphatidylcholine with diacyl residue sum C40:4)         | 29545352 |
| cg11250194 | rs174581  | 1.3E-262   | FADS1, FADS2, FEN1, MYRF, TMEM258                                                                                | rs174581-A                | 1.0E-08  | Male-pattern baldness                                            |                                                                                                               | 28196072 |
| cg11250194 | rs174583  | 2.3E-262   | FADS2                                                                                                            | rs174583-T                | 7.0E-18  | Serum metabolite ratios in chronic kidney disease                | (Phosphatidylcholine with acyl-alkyl residue sum C38:5/Sphingomyelin with acyl residue sum C16:0)             | 29545352 |
| cg11250194 | rs174592  | 1.3E-242   | FADS2                                                                                                            | rs174592-G                | 3.0E-13  | Serum metabolite ratios in chronic kidney disease                | (Phosphatidylcholine with acyl-alkyl residue sum C38:4/Sphingomyelin with acyl residue sum C16:0)             | 29545352 |
| cg11250194 | rs174594  | 4.1E-233   | FADS2                                                                                                            | rs174594-?                | 4.0E-09  | Hemoglobin A1c levels                                            |                                                                                                               | 29403010 |
| cg11250194 | rs174594  | 4.1E-233   | FADS2                                                                                                            | rs174594-A                | 5.0E-13  | Serum metabolite ratios in chronic kidney disease                | (Phosphatidylcholine with acyl-alkyl residue sum C36:2/Phosphatidylcholine with acyl-alkyl residue sum C42:5) | 29545352 |
| cg11250194 | rs174601  | 8.1E-237   | FADS1                                                                                                            | rs174601-T                | 8.0E-16  | Blood metabolite levels                                          | (stearidonate (18:4n3))                                                                                       | 24816252 |
| cg27039118 | rs1905376 | 5.0E-87    | TRPS1                                                                                                            | rs1905376-G               | 1.0E-13  | Red blood cell count                                             |                                                                                                               | 27863252 |
| cg27039118 | rs2049865 | 1.1E-91    | TRPS1                                                                                                            | rs2049865-A               | 6.0E-09  | Diverticular disease                                             |                                                                                                               | 30177863 |

Supplemental Table 8. Traits associated with *cis*-meQTLs in NHGRI-EBI GWAS catalog

(continued)

| CpG        | SNP        | cismeQTL.P | GWAS.Reported.Gene                                                                                                | GWAS.Reported.Risk.Allele | GWAS.P  | GWAS.Trait                                                       | GWAS.Trait.Description                                                                                        | PUBMD.ID |
|------------|------------|------------|-------------------------------------------------------------------------------------------------------------------|---------------------------|---------|------------------------------------------------------------------|---------------------------------------------------------------------------------------------------------------|----------|
| cg11250194 | rs2071213  | 2.6E-11    | FADS1, FADS2                                                                                                      | rs2071213-A               | 3.0E-09 | Moyamoya disease                                                 |                                                                                                               | 29273593 |
| cg27039118 | rs2293889  | 1.5E-92    | TRPS1                                                                                                             | rs2293889-T               | 5.0E-19 | HDL cholesterol levels                                           | (Trans-ethnic initial)                                                                                        | 28334899 |
| cg27039118 | rs2293889  | 1.5E-92    | TRPS1                                                                                                             | rs2293889-T               | 4.0E-17 | HDL cholesterol                                                  |                                                                                                               | 24097068 |
| cg27039118 | rs2293889  | 1.5E-92    | TRPS1                                                                                                             | rs2293889-T               | 6.0E-11 | HDL cholesterol                                                  |                                                                                                               | 20686565 |
| cg11250194 | rs2727270  | 5.4E-24    | FTH1, INCENP, FADS1, FADS2, SCGB1D1, SCGB2A1, C11orf9, DAGLA, FEN1, RAB31L, C11orf10, FADS3, SYT7, BEST1, SCGB1D2 | rs2727270-T               | 3.0E-21 | Plasma omega-6 polyunsaturated fatty acid levels (linoleic acid) | (Conditioned on rs174547)                                                                                     | 24823311 |
| cg11250194 | rs2727271  | 2.6E-24    | FADS1                                                                                                             | rs2727271-A               | 3.0E-11 | Blood metabolite levels                                          | (X-12990--docosapentaenoic acid (n6-DPA))                                                                     | 24816252 |
| cg11250194 | rs28456    | 8.3E-315   | FADS1, FADS2                                                                                                      | rs28456-G                 | 3.0E-15 | Serum metabolite ratios in chronic kidney disease                | C42:1/Phosphatidylcholine with acyl-alkyl residue sum C36:2)                                                  | 29545352 |
| cg11250194 | rs28456    | 8.3E-315   | FEN1, FADS1, FADS2                                                                                                | rs28456-G                 | 6.0E-09 | Bipolar disorder                                                 | (Japanese)                                                                                                    | 28115744 |
| cg07805029 | rs41286801 | 5.4E-09    | EVI5                                                                                                              | rs41286801-A              | 1.0E-26 | Multiple sclerosis                                               |                                                                                                               | 24076602 |
| cg25953130 | rs4245595  | 2.6E-20    | ARID5B                                                                                                            | rs4245595-C               | 2.0E-09 | Acute lymphoblastic leukemia (childhood)                         |                                                                                                               | 25310577 |
| cg11250194 | rs4246215  | 1.2E-253   | C11orf9, FADS1, FADS2                                                                                             | rs4246215-T               | 2.0E-15 | Inflammatory bowel disease                                       |                                                                                                               | 23128233 |
| cg26470501 | rs519113   | 9.7E-10    | APOE, PVRL2, TOMM40                                                                                               | rs519113-C                | 8.0E-11 | HDL cholesterol                                                  |                                                                                                               | 21909109 |
| cg05232694 | rs6512645  | 3.6E-08    | intergenic                                                                                                        | rs6512645-A               | 2.0E-13 | Mean corpuscular volume                                          |                                                                                                               | 27863252 |
| cg05232694 | rs6512645  | 3.6E-08    | intergenic                                                                                                        | rs6512645-A               | 1.0E-14 | Mean corpuscular hemoglobin                                      |                                                                                                               | 27863252 |
| cg07805029 | rs6689470  | 5.2E-09    | EVI5                                                                                                              | rs6689470-A               | 4.0E-10 | Multiple sclerosis                                               |                                                                                                               | 27386562 |
| cg27039118 | rs6982226  | 3.7E-09    | NR                                                                                                                | rs6982226-T               | 1.0E-10 | Male-pattern baldness                                            |                                                                                                               | 28196072 |
| cg25953130 | rs7089424  | 1.3E-20    | ARID5B                                                                                                            | rs7089424-T               | 2.0E-62 | Acute lymphoblastic leukemia (childhood)                         |                                                                                                               | 29348612 |
| cg25953130 | rs7089424  | 1.3E-20    | ARID5B                                                                                                            | rs7089424-C               | 7.0E-19 | Acute lymphoblastic leukemia (childhood)                         |                                                                                                               | 19684604 |
| cg16936953 | rs7212590  | 3.2E-40    | VMP1                                                                                                              | rs7212590-T               | 2.0E-30 | Monocyte count                                                   |                                                                                                               | 27863252 |
| cg02508743 | rs7833986  | 8.7E-76    | PLAG1                                                                                                             | rs7833986-A               | 8.0E-10 | Height                                                           |                                                                                                               | 20189936 |
| cg11250194 | rs7943728  | 1.9E-274   | MYRF                                                                                                              | rs7943728-A               | 4.0E-19 | Serum metabolite ratios in chronic kidney disease                | (Phosphatidylcholine with acyl-alkyl residue sum C34:2/Phosphatidylcholine with acyl-alkyl residue sum C36:3) | 29545352 |
| cg16969872 | rs7988232  | 1.3E-10    | RBM26                                                                                                             | rs7988232-A               | 3.0E-09 | Systolic blood pressure                                          |                                                                                                               | 30224653 |
| cg27039118 | rs800890   | 4.7E-08    | TRPS1                                                                                                             | rs800890-C                | 2.0E-08 | Male-pattern baldness                                            |                                                                                                               | 28196072 |
| cg16936953 | rs8070345  | 1.4E-75    | VMP1                                                                                                              | rs8070345-A               | 2.0E-23 | Multiple sclerosis                                               |                                                                                                               | 24076602 |
| cg05232694 | rs913678   | 5.5E-24    | intergenic                                                                                                        | rs913678-C                | 2.0E-36 | Monocyte count                                                   |                                                                                                               | 27863252 |
| cg11250194 | rs968567   | 6.2E-281   | FADS1, FADS2, FADS3                                                                                               | rs968567-C                | 2.0E-08 | Rheumatoid arthritis                                             | (EA)                                                                                                          | 24390342 |
| cg11250194 | rs968567   | 6.2E-281   | FADS1                                                                                                             | rs968567-T                | 3.0E-19 | Blood metabolite levels                                          | (1-eicosatrienoylglycerophosphocholine)                                                                       | 24816252 |
| cg11250194 | rs968567   | 6.2E-281   | FADS2                                                                                                             | rs968567-T                | 5.0E-14 | Serum metabolite ratios in chronic kidney disease                | (Phosphatidylcholine with diacyl residue sum C42:0/Phosphatidylcholine with acyl-alkyl residue sum C44:6)     | 29545352 |
| cg11250194 | rs97384    | 8.2E-223   | FADS2                                                                                                             | rs97384-C                 | 4.0E-13 | Serum metabolite ratios in chronic kidney disease                | (Phosphatidylcholine with diacyl residue sum C34:2/Phosphatidylcholine with acyl-alkyl residue sum C42:5)     | 29545352 |
| cg11250194 | rs99780    | 6.5E-265   | FADS2                                                                                                             | rs99780-T                 | 2.0E-16 | Serum metabolite ratios in chronic kidney disease                | (Phosphatidylcholine with diacyl residue sum C34:4/Phosphatidylcholine with acyl-alkyl residue sum C36:2)     | 29545352 |



Supplemental Table 9. Association between diet-associated CpGs with cardiovascular risk factors reported in EWAS catalog

| CpG        | Direction. |                             | Direction. |           |          |         |       | Age   | Tissue                                 | PMID     |
|------------|------------|-----------------------------|------------|-----------|----------|---------|-------|-------|----------------------------------------|----------|
|            | Diet       | Trait                       | Trait      | Beta      | SE       | P       | N     |       |                                        |          |
| cg01294327 | +          | Smoking                     | -          | -0.0404   | 0.0055   | 2.0E-13 | 9389  | 60.3  | Whole blood, CD4+ T cells or monocytes | 27651444 |
| cg01294327 | +          | Smoking                     | -          | -0.61493  | 0.0913   | 1.6E-11 | 1597  | 67    | Peripheral blood                       | 28686328 |
| cg01294327 | +          | Smoking                     | -          | -0.236    | 0.046823 | 4.7E-07 | 596   | 53.9  | Whole blood                            | 26756918 |
| cg01940273 | +          | Smoking                     | -          | -1.80094  | 0.0886   | 6.8E-92 | 1597  | 67    | Peripheral blood                       | 28686328 |
| cg01940273 | +          | Smoking                     | -          |           |          | 1.8E-78 | 721   | 52.6  | Peripheral blood                       | 26864933 |
| cg01940273 | +          | Smoking                     | -          | -0.61     | 0.0336   | 7.4E-74 | 582   | 54    | Whole blood                            | 25556184 |
| cg01940273 | +          | Tobacco smoking             | -          |           |          | 1.4E-64 | 454   | 52    | Whole blood                            | 28225026 |
| cg01940273 | +          | Smoking                     | -          | -0.08675  | 0.0058   | 1.0E-50 | 535   | 70    | Whole blood                            | 25249537 |
| cg01940273 | +          | Smoking                     | -          |           |          | 5.5E-43 | 468   | 53    | Whole blood                            | 23691101 |
| cg01940273 | +          | Smoking                     | -          |           |          | 5.6E-43 | 645   | 63.2  | Peripheral blood                       | 26829059 |
| cg01940273 | +          | Smoking                     | -          | -0.0815   | 0.0067   | 2.0E-34 | 9389  | 60.3  | Whole blood, CD4+ T cells or monocytes | 27651444 |
| cg01940273 | +          | Smoking                     | -          | -0.539    | 0.044994 | 4.6E-33 | 596   | 53.9  | Whole blood                            | 26756918 |
| cg01940273 | +          | Smoking                     | -          |           |          | 3.7E-32 | 464   | 55.39 | Whole Blood                            | 25424692 |
| cg01940273 | +          | Smoking                     | -          |           |          | 2.5E-10 | 111   | 48.4  | Peripheral Blood                       | 24559495 |
| cg01940273 | +          | Alcohol consumption per day | -          | -9.79E-05 | 1.56E-05 | 3.8E-10 | 2423  | 56    | Whole blood                            | 27843151 |
| cg01940273 | +          | Smoking                     | -          |           |          | 5.9E-09 | 190   | 55    | Peripheral blood                       | 23175441 |
| cg01940273 | +          | Alcohol consumption der day | -          | -0.00046  | 7.99E-05 | 1.1E-08 | 9643  | 64.2  | Whole blood                            | 27843151 |
| cg01940273 | +          | Smoking                     | -          |           |          | 1.9E-08 | 100   |       | Peripheral blood                       | 26441693 |
| cg02079413 | -          | Body mass index             | +          | 7.4       | 1.7      | 2.1E-05 | 4851  | 54.5  | Whole blood                            | 28002404 |
| cg02508743 | -          | Smoking                     | +          | 0.011     | 0.0016   | 8.1E-12 | 9389  | 60.3  | Whole blood, CD4+ T cells or monocytes | 27651444 |
| cg02716826 | +          | C-reactive protein          | -          | -0.0037   | 0.000463 | 1.3E-15 | 8863  | 65    | Whole blood                            | 27955697 |
| cg02716826 | +          | Age                         | -          |           |          | 5.4E-15 | 1264  | 60    | Monocytes                              | 25404168 |
| cg02716826 | +          | C-reactive protein          | -          | -0.031    | 0.005    | 2.7E-08 | 1741  | 60.9  | Peripheral blood                       | 27824951 |
| cg02716826 | +          | Body mass index             | -          | -14.6     | 2.75     | 1.1E-07 | 2707  | 57.9  | Whole blood                            | 28002404 |
| cg02716826 | +          | Smoking                     | -          | -0.0096   | 0.002    | 2.5E-06 | 9389  | 60.3  | Whole blood, CD4+ T cells or monocytes | 27651444 |
| cg02716826 | +          | Body mass index             | -          | -0.0236   | 0.00957  | 1.5E-02 | 442   | 67    | Whole blood                            | 28095459 |
| cg03190891 | -          | Smoking                     | +          | 0.0114    | 0.0016   | 1.8E-12 | 9389  | 60.3  | Whole blood, CD4+ T cells or monocytes | 27651444 |
| cg03190891 | -          | Smoking                     | +          | 0.581587  | 0.0928   | 3.6E-10 | 1597  | 67    | Peripheral blood                       | 28686328 |
| cg03190891 | -          | Alcohol consumption per day | +          | 5.05E-05  | 9.72E-06 | 2.0E-07 | 2423  | 56    | Whole blood                            | 27843151 |
| cg03190891 | -          | Smoking                     | -          |           |          | 1.5E-06 | 721   | 52.6  | Peripheral blood                       | 26864933 |
| cg03190891 | -          | Alcohol consumption der day | +          | 0.000151  | 3.99E-05 | 1.6E-04 | 9643  | 64.2  | Whole blood                            | 27843151 |
| cg03646329 | +          | Smoking                     | -          | -0.0244   | 0.0039   | 5.6E-10 | 9389  | 60.3  | Whole blood, CD4+ T cells or monocytes | 27651444 |
| cg03646329 | +          | Smoking                     | -          | -0.196    | 0.039837 | 8.7E-07 | 596   | 53.9  | Whole blood                            | 26756918 |
| cg03646329 | +          | Smoking                     | -          |           |          | 2.0E-06 | 721   | 52.6  | Peripheral blood                       | 26864933 |
| cg03646329 | +          | Smoking                     | -          |           |          | 3.1E-03 | 1531  | 61.5  | Whole blood                            | 23691101 |
| cg04885881 | +          | Smoking                     | -          | -0.29     | 0.0277   | 1.4E-25 | 582   | 54    | Whole blood                            | 25556184 |
| cg04885881 | +          | Age                         | -          | -0.0209   | 0.002119 | 3.0E-23 | 1366  | 73    | Whole blood                            | 28811542 |
| cg04885881 | +          | Tobacco smoking             | -          |           |          | 8.5E-20 | 454   | 52    | Whole blood                            | 28225026 |
| cg04885881 | +          | Smoking                     | -          | 0         | 0        | 3.6E-19 | 13474 | 62.9  | Whole blood, CD4+ T cells or monocytes | 27651444 |
| cg04885881 | +          | Smoking                     | -          |           |          | 6.6E-13 | 468   | 53    | Whole blood                            | 23691101 |

Supplemental Table 9. Association between diet-associated CpGs with cardiovascular risk factors reported in EWAS catalog

(continued)

| CpG        | Direction. |                             | Direction. |           | Beta     | SE      | P       | N    | Age  | Tissue                                 | PMID     |
|------------|------------|-----------------------------|------------|-----------|----------|---------|---------|------|------|----------------------------------------|----------|
|            | Diet       | Trait                       | Trait      |           |          |         |         |      |      |                                        |          |
| cg04885881 | +          | Smoking                     |            |           |          |         | 4.1E-11 | 717  | 53.4 | Peripheral blood                       | 26864933 |
| cg04885881 | +          | Smoking                     | -          | -0.58137  | 0.0903   | 1.2E-10 | 1597    | 67   | 67   | Peripheral blood                       | 28686328 |
| cg04885881 | +          | Smoking                     | -          | -0.022    | 0.0036   | 1.5E-09 | 421     | 43.8 | 43.8 | Whole Blood                            | 24334605 |
| cg04885881 | +          | Alcohol consumption per day | -          | -9.12E-05 | 1.54E-05 | 3.1E-09 | 2423    | 56   | 56   | Whole blood                            | 27843151 |
| cg04885881 | +          | Smoking                     |            |           |          | 6.9E-09 | 449     | 63.1 | 63.1 | Peripheral blood                       | 26829059 |
| cg04885881 | +          | Alcohol consumption der day | -          | -0.00023  | 5.95E-05 | 1.6E-04 | 9643    | 64.2 | 64.2 | Whole blood                            | 27843151 |
| cg05232694 | +          | C-reactive protein          | -          | -0.0053   | 0.000894 | 3.0E-09 | 8863    | 65   | 65   | Whole blood                            | 27955697 |
| cg05232694 | +          | Smoking                     | -          | 0         | 0        | 7.3E-07 | 13474   | 62.9 | 62.9 | Whole blood, CD4+ T cells or monocytes | 27651444 |
| cg05232694 | +          | Alcohol consumption der day | -          | -0.0005   | 0.000136 | 2.2E-04 | 9643    | 64.2 | 64.2 | Whole blood                            | 27843151 |
| cg08732950 | -          | Smoking                     | +          | 0.0088    | 0.0016   | 2.3E-08 | 9389    | 60.3 | 60.3 | Whole blood, CD4+ T cells or monocytes | 27651444 |
| cg09940677 | -          | Smoking                     | +          | 0.0081    | 9.00E-04 | 1.0E-18 | 9389    | 60.3 | 60.3 | Whole blood, CD4+ T cells or monocytes | 27651444 |
| cg09940677 | -          | Alcohol consumption per day | +          | 5.70E-05  | 9.00E-06 | 2.4E-10 | 2423    | 56   | 56   | Whole blood                            | 27843151 |
| cg09940677 | -          | C-reactive protein          | +          | 0.0023    | 0.000856 | 7.2E-03 | 4111    | 59.7 | 59.7 | Whole blood                            | 27955697 |
| cg11468085 | -          | Alcohol consumption per day | +          | 4.59E-05  | 8.87E-06 | 2.3E-07 | 2423    | 56   | 56   | Whole blood                            | 27843151 |
| cg13074055 | +          | Smoking                     | -          | -0.322    | 0.049434 | 7.3E-11 | 596     | 53.9 | 53.9 | Whole blood                            | 26756918 |
| cg13074055 | +          | Smoking                     | -          | -0.59383  | 0.0928   | 1.5E-10 | 1597    | 67   | 67   | Peripheral blood                       | 28686328 |
| cg13074055 | +          | Smoking                     | -          | -0.0403   | 0.0067   | 1.6E-09 | 9389    | 60.3 | 60.3 | Whole blood, CD4+ T cells or monocytes | 27651444 |
| cg13074055 | +          | Smoking                     |            |           |          | 2.6E-09 | 721     | 52.6 | 52.6 | Peripheral blood                       | 26864933 |
| cg13074055 | +          | Tobacco smoking             |            |           |          | 3.0E-05 | 454     | 52   | 52   | Whole blood                            | 28225026 |
| cg16936953 | +          | C-reactive protein          | -          | -0.0077   | 0.000816 | 3.7E-21 | 8863    | 65   | 65   | Whole blood                            | 27955697 |
| cg16936953 | +          | Age                         |            |           |          | 1.5E-09 | 227     |      |      | T cells                                | 25404168 |
| cg16936953 | +          | Smoking                     | -          | -0.0118   | 0.0022   | 7.0E-08 | 9389    | 60.3 | 60.3 | Whole blood, CD4+ T cells or monocytes | 27651444 |
| cg16969872 | +          | Smoking                     |            |           |          | 2.7E-08 | 721     | 52.6 | 52.6 | Peripheral blood                       | 26864933 |
| cg16969872 | +          | Smoking                     | -          | -0.017    | 0.0031   | 5.2E-08 | 9389    | 60.3 | 60.3 | Whole blood, CD4+ T cells or monocytes | 27651444 |
| cg16969872 | +          | Tobacco smoking             |            |           |          | 3.5E-06 | 454     | 52   | 52   | Whole blood                            | 28225026 |
| cg16969872 | +          | Alcohol consumption der day | -          | -0.00026  | 5.87E-05 | 9.3E-06 | 9643    | 64.2 | 64.2 | Whole blood                            | 27843151 |
| cg16969872 | +          | Smoking                     |            |           |          | 2.6E-02 | 1531    | 61.5 | 61.5 | Whole blood                            | 23691101 |
| cg18181703 | +          | Body mass index             |            |           |          | 4.0E-35 | 10238   | 54.5 | 54.5 | Whole blood                            | 28002404 |
| cg18181703 | +          | C-reactive protein          | -          | -0.0091   | 0.001268 | 7.1E-13 | 4111    | 59.7 | 59.7 | Whole blood                            | 27955697 |
| cg18181703 | +          | Alcohol consumption per day | -          | -8.36E-05 | 1.29E-05 | 9.2E-11 | 2423    | 56   | 56   | Whole blood                            | 27843151 |
| cg18181703 | +          | Body mass index             | -          | -0.0022   | 0.00033  | 1.1E-10 | 510     | 29   | 29   | Whole blood                            | 27826092 |
| cg18181703 | +          | Type II diabetes            | -          | -0.05129  | 0.0099   | 2.1E-07 | 2664    | 50   | 50   | Peripheral blood                       | 26095709 |
| cg18181703 | +          | Body mass index             | -          | -0.15     | 0.031    | 1.8E-06 | 1052    | 39   | 39   | Peripheral blood mononuclear cells     | 27564309 |
| cg18181703 | +          | Smoking                     | -          | -0.0036   | 0.0012   | 2.4E-03 | 13474   | 62.9 | 62.9 | Whole blood, CD4+ T cells or monocytes | 27651444 |
| cg18181703 | +          | Alcohol consumption der day | -          | -0.00013  | 4.53E-05 | 4.8E-03 | 9643    | 64.2 | 64.2 | Whole blood                            | 27843151 |
| cg19202384 | +          | Alcohol consumption der day | -          | -0.00026  | 4.78E-05 | 4.6E-08 | 9643    | 64.2 | 64.2 | Whole blood                            | 27843151 |
| cg19202384 | +          | Smoking                     | -          | -0.0068   | 0.0016   | 1.3E-05 | 9389    | 60.3 | 60.3 | Whole blood, CD4+ T cells or monocytes | 27651444 |
| cg19202384 | +          | Tobacco smoking             |            |           |          | 5.0E-05 | 454     | 52   | 52   | Whole blood                            | 28225026 |
| cg19202384 | +          | Smoking                     |            |           |          | 5.1E-05 | 721     | 52.6 | 52.6 | Peripheral blood                       | 26864933 |
| cg19693031 | +          | Serum triglycerides         | -          | -0.039    | 0.004    | 0.0E+00 | 3187    | 65.7 | 65.7 | Whole blood                            | 28173150 |

Supplemental Table 9. Association between diet-associated CpGs with cardiovascular risk factors reported in EWAS catalog

(continued)

| CpG        | Direction. |                             | Direction. |           | Beta     | SE      | P     | N    | Age | Tissue                                 | PMID     |
|------------|------------|-----------------------------|------------|-----------|----------|---------|-------|------|-----|----------------------------------------|----------|
|            | Diet       | Trait                       | Trait      | Trait     |          |         |       |      |     |                                        |          |
| cg19693031 | +          | HbA1c                       | -          | -0.129    | 0.016    | 7.3E-16 | 268   | 74   |     | Peripheral blood                       | 26643952 |
| cg19693031 | +          | Alcohol consumption der day | -          | -0.00044  | 6.46E-05 | 1.0E-11 | 9643  | 64.2 |     | Whole blood                            | 27843151 |
| cg19693031 | +          | Triglycerides               | -          | -0.0133   | 0.0025   | 6.7E-08 | 1485  | 64   |     | Whole blood                            | 28194238 |
| cg19693031 | +          | Hypertriglyceridemic waist  | +          | 0.302844  | 0.05726  | 1.2E-07 | 850   | 46.8 |     | Peripheral blood                       | 26798409 |
| cg19693031 | +          | Serum triglycerides         | -          | -0.01093  | 0.002263 | 1.4E-06 | 1955  | 61   |     | Whole blood                            | 28213390 |
| cg19693031 | +          | Type II diabetes            | -          | -0.3      | 0.0621   | 1.4E-06 | 167   | 74.8 |     | Peripheral blood                       | 26643952 |
| cg19693031 | +          | Alcohol consumption per day | -          | -0.0005   | 0.000115 | 1.7E-05 | 1251  | 60   |     | CD14+ monocytes                        | 27843151 |
| cg19693031 | +          | Type II diabetes            | -          | -0.031    | 0.0072   | 1.9E-05 | 527   | 63   |     | Whole blood                            | 26433941 |
| cg19693031 | +          | Type II diabetes            | -          | -0.0408   | 0.0097   | 2.5E-05 | 1141  | 59   |     | Peripheral blood                       | 26095709 |
| cg19693031 | +          | Triglycerides               | -          |           |          | 5.7E-03 | 971   | 62   |     | Whole blood                            | 25583993 |
| cg20842915 | +          | Smoking                     | -          | -0.52763  | 0.0952   | 3.0E-08 | 1597  | 67   |     | Peripheral blood                       | 28686328 |
| cg20842915 | +          | Smoking                     | -          | -0.0088   | 0.0028   | 1.8E-03 | 9389  | 60.3 |     | Whole blood, CD4+ T cells or monocytes | 27651444 |
| cg24694018 | +          | Smoking                     | -          | -0.0052   | 0.0014   | 2.0E-04 | 9389  | 60.3 |     | Whole blood, CD4+ T cells or monocytes | 27651444 |
| cg24735226 | -          | Smoking                     | +          | 0.0052    | 0.0015   | 6.0E-04 | 13474 | 62.9 |     | Whole blood, CD4+ T cells or monocytes | 27651444 |
| cg25909064 | +          | Age                         | -          | -0.0055   | 0.001464 | 8.6E-05 | 1366  | 73   |     | Whole blood                            | 28811542 |
| cg25953130 | +          | Smoking                     | -          | -0.21     | 0.0362   | 6.5E-09 | 582   | 54   |     | Whole blood                            | 25556184 |
| cg25953130 | +          | Smoking                     | -          |           |          | 2.1E-07 | 468   | 53   |     | Whole blood                            | 23691101 |
| cg25953130 | +          | Smoking                     | -          |           |          | 4.7E-07 | 721   | 52.6 |     | Peripheral blood                       | 26864933 |
| cg25953130 | +          | Smoking                     | -          | -0.0084   | 0.0019   | 8.1E-06 | 13474 | 62.9 |     | Whole blood, CD4+ T cells or monocytes | 27651444 |
| cg26470501 | +          | C-reactive protein          | -          | -0.0045   | 0.000488 | 2.9E-20 | 8863  | 65   |     | Whole blood                            | 27955697 |
| cg26470501 | +          | Body mass index             | -          |           |          | 8.3E-17 | 10238 | 54.5 |     | Whole blood                            | 28002404 |
| cg26470501 | +          | Body mass index             | -          |           |          | 2.6E-10 | 3743  | 69.2 |     | Whole blood                            | 28095459 |
| cg26470501 | +          | Smoking                     | -          | -0.09     | 0.0168   | 7.8E-08 | 582   | 54   |     | Whole blood                            | 25556184 |
| cg26470501 | +          | Smoking                     | -          | -0.0123   | 0.0024   | 2.3E-07 | 9389  | 60.3 |     | Whole blood, CD4+ T cells or monocytes | 27651444 |
| cg26470501 | +          | Alcohol consumption per day | -          | -4.35E-05 | 9.91E-06 | 1.2E-05 | 2423  | 56   |     | Whole blood                            | 27843151 |
| cg26470501 | +          | Tobacco smoking             | -          |           |          | 5.0E-05 | 454   | 52   |     | Whole blood                            | 28225026 |
| cg27039118 | +          | Smoking                     | -          | -0.0158   | 0.003    | 1.4E-07 | 9389  | 60.3 |     | Whole blood, CD4+ T cells or monocytes | 27651444 |
| cg27118035 | -          | Smoking                     | +          | 0.0136    | 0.0014   | 2.4E-22 | 9389  | 60.3 |     | Whole blood, CD4+ T cells or monocytes | 27651444 |
| cg27118035 | -          | Alcohol consumption per day | +          | 5.91E-05  | 9.02E-06 | 5.9E-11 | 2423  | 56   |     | Whole blood                            | 27843151 |
| cg27118035 | -          | Smoking                     | +          | 0.538722  | 0.0935   | 8.4E-09 | 1597  | 67   |     | Peripheral blood                       | 28686328 |
| cg27118035 | -          | Alcohol consumption der day | +          | 0.000103  | 2.52E-05 | 4.6E-05 | 9643  | 64.2 |     | Whole blood                            | 27843151 |

Supplemental Table 10. Mendelian Randomization analysis for association between diet-associated CpGs and cardiovascular risk factors (CpG to CVD trait)

| CpG        | Direction | BMI       |       |      |         |       |                  | WHRadjBMI |       |      |      |       |                  | TG        |       |      |         |       |                  | HDL       |       |      |         |       |                  | T2D       |       |        |        |       |                  |
|------------|-----------|-----------|-------|------|---------|-------|------------------|-----------|-------|------|------|-------|------------------|-----------|-------|------|---------|-------|------------------|-----------|-------|------|---------|-------|------------------|-----------|-------|--------|--------|-------|------------------|
|            |           | Direction | Beta  | SE   | P       | n_SNP | P for Pleiotropy | Direction | Beta  | SE   | P    | n_SNP | P for Pleiotropy | Direction | Beta  | SE   | P       | n_SNP | P for Pleiotropy | Direction | Beta  | SE   | P       | n_SNP | P for Pleiotropy | Direction | Beta  | SE     | P      | n_SNP | P for Pleiotropy |
| cg16969872 | +         | -         | -0.11 | 0.20 | 0.59    | 3     | 0.67             | -         | -0.22 | 0.50 | 0.65 | 3     | 0.83             | +         | 0.02  | 1.49 | 0.99    | 2     | 0.86             | +         | 0.05  | 0.80 | 0.95    | 2     | -                | -0.10     | 0.70  | 0.88   | 4      | 0.70  |                  |
| cg01940273 | +         | -         | -0.42 | 0.22 | 0.06    | 3     | 0.32             | -         | -0.17 | 0.46 | 0.71 | 3     | 0.78             | +         | 0.09  | 0.55 | 0.87    | 2     | 0.86             | -         | -0.83 | 0.56 | 0.14    | 2     | -                | -0.23     | 0.66  | 0.73   | 3      | 0.45  |                  |
| cg02716826 | +         | +         | 0.75  | 0.71 | 0.29    | 1     |                  | +         | 0.75  | 1.78 | 0.67 | 1     |                  | +         | 0.40  | 1.94 | 0.84    | 1     | 0.86             | +         | 0.04  | 1.98 | 0.98    | 1     | -                | -0.76     | 2.61  | 0.77   | 1      |       |                  |
| cg04885881 | +         | -         | -5.60 | 0.85 | 4.7E-11 | 1     |                  | +         | 4.21  | 2.06 | 0.04 | 1     |                  | -         | -1.48 | 2.33 | 0.53    | 1     | 0.86             | -         | -1.97 | 2.37 | 0.41    | 1     | +                | 12.09     | 3.13  | 0.0001 | 1      |       |                  |
| cg16936953 | +         | -         | -0.35 | 0.11 | 0.001   | 5     | 0.36             | +         | 0.51  | 0.25 | 0.04 | 6     | 0.57             | +         | 0.50  | 0.26 | 0.06    | 5     | 0.77             | -         | -0.49 | 0.27 | 0.07    | 5     | 0.81             | +         | 1.34  | 0.79   | 0.09   | 3     | 0.91             |
| cg25909064 | +         | +         | 0.57  | 0.74 | 0.44    | 3     | 0.73             | +         | -0.48 | 0.69 | 0.49 | 4     | 0.33             | +         | 1.01  | 0.67 | 0.13    | 4     | 0.61             | -         | -0.41 | 0.81 | 0.61    | 4     | 0.93             | +         | 0.27  | 2.38   | 0.91   | 3     | 0.64             |
| cg25953130 | +         | +         | 0.78  | 0.27 | 0.004   | 1     |                  | -         | -1.65 | 0.67 | 0.01 | 1     |                  | +         | 0.33  | 0.75 | 0.66    | 1     | 0.86             | +         | 0.72  | 0.75 | 0.34    | 1     |                  |           |       |        |        |       |                  |
| cg01294327 | +         | -         | -0.01 | 0.13 | 0.93    | 2     |                  | -         | -0.68 | 0.36 | 0.06 | 5     | 0.38             | -         | -0.33 | 0.39 | 0.40    | 5     | 0.86             | +         | 0.51  | 0.40 | 0.21    | 5     | 0.88             | -         | -0.16 | 0.97   | 0.87   | 2     |                  |
| cg05232694 | +         | +         | 0.22  | 0.19 | 0.24    | 5     | 0.12             | -         | -0.68 | 0.36 | 0.06 | 5     | 0.38             | -         | -0.33 | 0.39 | 0.40    | 5     | 0.86             | +         | 0.51  | 0.40 | 0.21    | 5     | 0.88             | -         | -0.16 | 0.97   | 0.87   | 2     |                  |
| cg07805029 | +         | -         | -2.15 | 0.40 | 6.7E-08 | 1     |                  | +         | 3.58  | 4.58 | 0.43 | 1     |                  | +         | 4.48  | 3.03 | 0.14    | 1     | 0.86             | +         | 4.16  | 3.03 | 0.17    | 1     |                  |           |       |        |        |       |                  |
| cg11250194 | +         | -         | -0.33 | 0.16 | 0.03    | 12    | 0.69             | +         | 0.26  | 0.24 | 0.28 | 13    | 0.63             | -         | -3.01 | 0.39 | 1.5E-14 | 18    | 0.86             | +         | 2.33  | 0.41 | 1.7E-08 | 18    | 1.00             | +         | 1.12  | 0.38   | 0.003  | 17    | 0.71             |
| cg26470501 | +         | +         | 0.77  | 0.19 | 6.5E-05 | 4     | 0.63             | +         | 0.58  | 0.50 | 0.25 | 4     | 0.95             | -         | -0.87 | 0.65 | 0.18    | 4     | 0.71             | -         | -0.44 | 1.13 | 0.69    | 4     | 0.87             | +         | 2.72  | 0.81   | 0.0009 | 2     |                  |
| cg27039118 | +         | +         | 0.63  | 0.55 | 0.25    | 4     | 0.23             | +         | -0.03 | 0.50 | 0.95 | 4     | 0.53             | +         | 0.58  | 0.65 | 0.37    | 4     | 0.12             | -         | -0.71 | 0.60 | 0.24    | 4     | 0.17             | +         | 0.92  | 0.65   | 0.16   | 5     | 0.49             |
| cg08732950 | -         | -         | -0.71 | 0.26 | 0.007   | 5     | 0.41             | -         | -0.81 | 0.67 | 0.22 | 6     | 0.54             | -         | -2.15 | 1.11 | 0.05    | 5     | 0.39             | +         | 2.63  | 1.03 | 0.01    | 5     | 0.21             | -         | -3.68 | 1.35   | 0.006  | 7     | 0.75             |
| cg02079413 | -         | +         | 0.73  | 0.15 | 1.0E-06 | 5     | 0.62             | +         | 0.43  | 0.37 | 0.25 | 5     | 0.77             | -         | -0.14 | 0.41 | 0.73    | 5     | 0.81             | +         | 2.14  | 0.69 | 0.002   | 5     | 0.30             | -         | -0.77 | 0.75   | 0.30   | 4     | 0.51             |
| cg27118035 | -         | -         |       |      |         |       |                  | +         | -2.99 | 2.08 | 0.15 | 1     |                  | -         | -2.62 | 2.28 | 0.25    | 1     | 0.86             | -         | -2.38 | 2.42 | 0.32    | 1     |                  |           |       |        |        |       |                  |
| cg02508743 | -         | +         | 0.28  | 0.12 | 0.02    | 6     | 0.95             | -         | -0.27 | 0.30 | 0.37 | 6     | 0.60             | -         | -0.33 | 0.34 | 0.33    | 5     | 0.72             | +         | 0.06  | 0.35 | 0.86    | 5     | 0.90             | +         | 1.08  | 0.55   | 0.047  | 9     | 0.19             |
| cg03190891 | -         | +         | 0.62  | 0.77 | 0.42    | 3     | 0.67             | +         | 0.97  | 0.82 | 0.23 | 3     | 0.73             | -         | -0.05 | 0.77 | 0.95    | 3     | 0.53             | -         | -0.84 | 0.79 | 0.29    | 3     | 0.97             | +         | 3.96  | 1.05   | 0.0002 | 3     | 0.88             |
| cg08884571 | -         | +         | 0.01  | 0.39 | 0.97    | 1     |                  | +         | 2.40  | 1.08 | 0.03 | 1     |                  |           |       |      |         |       |                  | -         | -3.68 | 1.21 | 0.002   | 1     |                  |           |       |        |        |       |                  |
| cg09940677 | -         | -         | -0.04 | 1.27 | 0.98    | 1     |                  | +         | 0.83  | 3.06 | 0.79 | 1     |                  | +         | 2.86  | 3.29 | 0.39    | 1     | 0.86             | +         | 1.11  | 3.33 | 0.74    | 1     |                  | +         | 1.31  | 4.76   | 0.78   | 1     |                  |
| cg11468085 | +         | +         | 0.31  | 0.28 | 0.27    | 2     |                  | -         | -1.25 | 0.79 | 0.12 | 2     |                  | -         | -0.11 | 0.78 | 0.89    | 2     | 0.86             | +         | 0.21  | 1.15 | 0.85    | 2     |                  | +         | 0.32  | 1.88   | 0.86   | 2     |                  |
| cg24735226 | -         | +         | 0.13  | 0.12 | 0.27    | 5     | 0.32             | -         | -0.21 | 0.26 | 0.42 | 6     | 0.41             | +         | 0.20  | 0.30 | 0.50    | 5     | 0.63             | -         | -0.75 | 0.40 | 0.06    | 5     | 0.09             | -         | -0.17 | 0.33   | 0.61   | 11    | 0.51             |

Supplemental Table 11. Mendelian Randomization analysis for association between diet-associated CpGs and cardiovascular risk factors (CVD trait to CpG)

| CpG        | Direction, Diet | BMI       |         |        |      |                  | WHR       |         |        |      |                  | TG        |         |        |      |                  | HDL       |         |        |      |                  | T2D       |         |        |      |                  |
|------------|-----------------|-----------|---------|--------|------|------------------|-----------|---------|--------|------|------------------|-----------|---------|--------|------|------------------|-----------|---------|--------|------|------------------|-----------|---------|--------|------|------------------|
|            |                 | Direction | Beta    | SE     | p    | P for Pleiotropy | Direction | Beta    | SE     | p    | P for Pleiotropy | Direction | Beta    | SE     | p    | P for Pleiotropy | Direction | Beta    | SE     | p    | P for Pleiotropy | Direction | Beta    | SE     | p    | P for Pleiotropy |
| cg01294327 | +               | +         | 6.E-20  | 3.E-18 | 0.99 | 0.07             | -         | -8.E-21 | 8.E-18 | 1.00 | 0.74             | -         | -7.E-18 | 7.E-18 | 0.36 | 0.75             | -         | -8.E-19 | 4.E-18 | 0.84 | 0.91             | -         | -2.E-18 | 2.E-18 | 0.30 | 0.22             |
| cg01940273 | +               | -         | -3.E-03 | 2.E-03 | 0.11 | 0.72             | +         | 5.E-04  | 4.E-03 | 0.90 | 0.45             | +         | 3.E-03  | 4.E-03 | 0.45 | 0.68             | +         | 2.E-03  | 2.E-03 | 0.33 | 0.94             | -         | -7.E-04 | 8.E-04 | 0.35 | 0.83             |
| cg02079413 | -               | +         | 2.E-04  | 7.E-04 | 0.77 | 0.21             | +         | 1.E-03  | 2.E-03 | 0.46 | 0.35             | +         | 9.E-04  | 1.E-03 | 0.51 | 0.27             | -         | -1.E-03 | 7.E-04 | 0.15 | 0.44             | +         | 5.E-04  | 3.E-04 | 0.12 | 0.07             |
| cg02097604 | +               | +         | 3.E-05  | 8.E-04 | 0.97 | 0.43             | +         | 5.E-04  | 2.E-03 | 0.79 | 0.09             | +         | 7.E-04  | 2.E-03 | 0.70 | 0.92             | +         | 1.E-03  | 9.E-04 | 0.19 | 0.40             | -         | -7.E-05 | 4.E-04 | 0.85 | 0.52             |
| cg02508743 | -               | -         | -1.E-04 | 1.E-03 | 0.92 | 0.07             | +         | 1.E-03  | 3.E-03 | 0.60 | 0.85             | +         | 1.E-03  | 2.E-03 | 0.60 | 0.46             | +         | 5.E-04  | 1.E-03 | 0.69 | 0.65             | +         | 2.E-04  | 5.E-04 | 0.73 | 0.64             |
| cg02716826 | +               | -         | -2.E-03 | 9.E-04 | 0.06 | 0.48             | +         | 4.E-03  | 2.E-03 | 0.06 | 0.94             | -         | -5.E-04 | 2.E-03 | 0.81 | 0.79             | +         | 4.E-04  | 1.E-03 | 0.69 | 0.11             | -         | -5.E-04 | 4.E-04 | 0.19 | 0.79             |
| cg03190891 | -               | +         | 1.E-03  | 1.E-03 | 0.18 | 0.20             | -         | -1.E-03 | 2.E-03 | 0.57 | 0.11             | +         | 4.E-04  | 2.E-03 | 0.86 | 0.42             | +         | 2.E-03  | 1.E-03 | 0.10 | 0.92             | -         | -5.E-04 | 5.E-04 | 0.28 | 1.00             |
| cg03646329 | +               | +         | 2.E-03  | 2.E-03 | 0.24 | 0.50             | +         | 6.E-03  | 5.E-03 | 0.24 | 0.60             | -         | -4.E-04 | 4.E-03 | 0.93 | 0.34             | -         | -3.E-03 | 2.E-03 | 0.14 | 0.04             | +         | 5.E-04  | 9.E-04 | 0.57 | 0.80             |
| cg04885881 | +               | -         | -6.E-04 | 1.E-03 | 0.57 | 0.23             | +         | 6.E-04  | 3.E-03 | 0.82 | 0.32             | +         | 8.E-04  | 2.E-03 | 0.74 | 0.11             | +         | 9.E-05  | 1.E-03 | 0.95 | 0.03             | -         | -3.E-04 | 5.E-04 | 0.59 | 0.11             |
| cg05232694 | +               | -         | -9.E-04 | 2.E-03 | 0.67 | 0.66             | +         | 6.E-03  | 5.E-03 | 0.26 | 0.42             | -         | -4.E-03 | 5.E-03 | 0.42 | 0.82             | +         | 9.E-04  | 2.E-03 | 0.71 | 0.08             | -         | -7.E-04 | 1.E-03 | 0.48 | 0.87             |
| cg07805029 | +               | -         | -3.E-03 | 2.E-03 | 0.28 | 0.84             | +         | 1.E-02  | 6.E-03 | 0.07 | 0.20             | -         | -5.E-03 | 5.E-03 | 0.32 | 0.73             | +         | 2.E-03  | 3.E-03 | 0.56 | 0.44             | +         | 2.E-03  | 1.E-03 | 0.11 | 0.77             |
| cg08732950 | -               | +         | 5.E-04  | 6.E-04 | 0.43 | 0.30             | +         | 1.E-03  | 1.E-03 | 0.34 | 0.26             | -         | -2.E-03 | 1.E-03 | 0.13 | 0.82             | +         | 2.E-04  | 7.E-04 | 0.75 | 0.54             | -         | -8.E-05 | 3.E-04 | 0.78 | 0.40             |
| cg08884571 | -               | +         | 7.E-04  | 1.E-03 | 0.63 | 0.83             | +         | 2.E-03  | 3.E-03 | 0.58 | 0.31             | -         | -1.E-03 | 3.E-03 | 0.68 | 0.76             | -         | -1.E-03 | 2.E-03 | 0.49 | 0.87             | +         | 7.E-04  | 6.E-04 | 0.28 | 0.84             |
| cg09940677 | -               | +         | 2.E-04  | 7.E-04 | 0.81 | 0.48             | +         | 8.E-05  | 2.E-03 | 0.96 | 0.48             | -         | -2.E-03 | 1.E-03 | 0.27 | 0.15             | -         | -3.E-04 | 8.E-04 | 0.69 | 0.62             | +         | 3.E-05  | 3.E-04 | 0.92 | 0.55             |
| cg11250194 | +               | -         | -3.E-04 | 8.E-04 | 0.69 | 0.50             | +         | 2.E-03  | 2.E-03 | 0.38 | 0.87             | -         | -2.E-02 | 1.E-02 | 0.20 | 0.74             | +         | 5.E-04  | 8.E-04 | 0.52 | 0.26             | +         | 3.E-04  | 3.E-04 | 0.39 | 0.24             |
| cg11468085 | +               | +         | 8.E-04  | 1.E-03 | 0.45 | 0.70             | -         | -1.E-03 | 2.E-03 | 0.61 | 0.21             | +         | 2.E-03  | 2.E-03 | 0.47 | 0.39             | -         | -1.E-03 | 1.E-03 | 0.37 | 0.18             | -         | -2.E-04 | 4.E-04 | 0.66 | 0.48             |
| cg13074055 | +               | +         | 4.E-03  | 2.E-03 | 0.07 | 0.66             | +         | 3.E-03  | 5.E-03 | 0.49 | 0.80             | +         | 6.E-03  | 4.E-03 | 0.16 | 0.40             | -         | -2.E-03 | 2.E-03 | 0.39 | 0.48             | -         | -4.E-05 | 9.E-04 | 0.96 | 0.45             |
| cg16936953 | +               | -         | -1.E-03 | 2.E-03 | 0.56 | 0.91             | +         | 1.E-04  | 4.E-03 | 0.97 | 0.75             | +         | 3.E-03  | 3.E-03 | 0.37 | 0.66             | +         | 8.E-04  | 2.E-03 | 0.65 | 0.92             | +         | 4.E-04  | 7.E-04 | 0.60 | 0.28             |
| cg16969872 | +               | -         | -5.E-04 | 1.E-03 | 0.63 | 0.83             | +         | 1.E-03  | 2.E-03 | 0.66 | 0.29             | -         | -4.E-03 | 2.E-03 | 0.09 | 0.18             | -         | -5.E-05 | 1.E-03 | 0.97 | 0.88             | -         | -5.E-04 | 5.E-04 | 0.32 | 0.78             |
| cg18181703 | +               | -         | -2.E-03 | 1.E-03 | 0.04 | 0.35             | +         | 3.E-03  | 3.E-03 | 0.21 | 0.96             | -         | -6.E-04 | 2.E-03 | 0.81 | 0.78             | +         | 7.E-05  | 1.E-03 | 0.96 | 0.85             | +         | 1.E-04  | 5.E-04 | 0.81 | 0.99             |
| cg19202384 | +               | -         | -5.E-04 | 1.E-03 | 0.68 | 0.22             | +         | 3.E-03  | 3.E-03 | 0.31 | 0.13             | -         | -5.E-03 | 2.E-03 | 0.07 | 0.27             | +         | 1.E-03  | 1.E-03 | 0.47 | 0.19             | -         | -5.E-04 | 5.E-04 | 0.31 | 0.38             |
| cg19693031 | +               | +         | 3.E-04  | 1.E-03 | 0.83 | 0.76             | -         | -1.E-03 | 3.E-03 | 0.66 | 0.74             | +         | 2.E-03  | 3.E-03 | 0.52 | 0.26             | +         | 6.E-04  | 2.E-03 | 0.72 | 0.19             | -         | -1.E-03 | 6.E-04 | 0.08 | 0.65             |
| cg20842915 | +               | +         | 1.E-04  | 2.E-03 | 0.96 | 0.27             | -         | -4.E-03 | 5.E-03 | 0.45 | 0.27             | -         | -1.E-03 | 7.E-03 | 0.84 | 0.56             | -         | -2.E-03 | 3.E-03 | 0.50 | 0.88             | -         | -3.E-04 | 1.E-03 | 0.76 | 0.23             |
| cg24694018 | +               | +         | 8.E-04  | 9.E-04 | 0.33 | 0.78             | -         | -6.E-04 | 2.E-03 | 0.77 | 0.98             | +         | 2.E-04  | 2.E-03 | 0.93 | 0.47             | +         | 2.E-03  | 9.E-04 | 0.08 | 0.41             | -         | -4.E-04 | 4.E-04 | 0.33 | 0.08             |
| cg24735226 | -               | -         | -1.E-06 | 9.E-04 | 1.00 | 0.16             | -         | -1.E-03 | 2.E-03 | 0.56 | 0.44             | -         | -3.E-03 | 2.E-03 | 0.08 | 0.12             | +         | 1.E-03  | 9.E-04 | 0.24 | 0.48             | +         | 6.E-04  | 4.E-04 | 0.13 | 0.20             |
| cg25909064 | +               | -         | -8.E-04 | 8.E-04 | 0.30 | 0.73             | -         | -1.E-03 | 2.E-03 | 0.41 | 0.39             | -         | -7.E-04 | 2.E-03 | 0.65 | 0.60             | -         | -6.E-04 | 8.E-04 | 0.50 | 0.53             | -         | -2.E-05 | 3.E-04 | 0.94 | 0.55             |
| cg25953130 | +               | +         | 1.E-03  | 2.E-03 | 0.57 | 0.75             | -         | -1.E-02 | 4.E-03 | 0.02 | 0.56             | +         | 2.E-03  | 4.E-03 | 0.70 | 0.87             | +         | 3.E-03  | 2.E-03 | 0.20 | 0.96             | -         | -7.E-04 | 8.E-04 | 0.42 | 0.55             |
| cg26470501 | +               | -         | -1.E-03 | 1.E-03 | 0.22 | 0.27             | -         | -5.E-04 | 3.E-03 | 0.85 | 0.16             | -         | -3.E-03 | 2.E-03 | 0.16 | 0.77             | -         | -2.E-04 | 1.E-03 | 0.84 | 0.68             | +         | 3.E-04  | 5.E-04 | 0.57 | 0.91             |
| cg27039118 | +               | +         | 2.E-03  | 2.E-03 | 0.20 | 0.87             | -         | -3.E-03 | 4.E-03 | 0.34 | 0.88             | +         | 1.E-04  | 3.E-03 | 0.97 | 0.39             | -         | -3.E-03 | 5.E-03 | 0.57 | 0.25             | -         | -3.E-04 | 7.E-04 | 0.62 | 0.15             |
| cg27118035 | -               | -         | -4.E-04 | 1.E-03 | 0.73 | 0.54             | +         | 3.E-03  | 3.E-03 | 0.24 | 0.61             | -         | -3.E-03 | 2.E-03 | 0.27 | 0.19             | +         | 1.E-03  | 1.E-03 | 0.23 | 0.77             | +         | 6.E-04  | 5.E-04 | 0.22 | 0.83             |

Supplemental Table 12. Association of the 30 diet-associated CpGs in European Ancestry (EA) participants with diet scores in African Ancestry (AA) and Hispanic Ancestry (HA) participants

| CpG        | CHR | Position  | Gene           | Diet | Direction |    |    | AA <sup>1</sup> |        |      | HA <sup>2</sup> |        |       |
|------------|-----|-----------|----------------|------|-----------|----|----|-----------------|--------|------|-----------------|--------|-------|
|            |     |           |                |      | EA        | AA | HA | Beta            | SE     | P    | Beta            | SE     | P     |
| cg04885881 | 1   | 11123118  |                | MDS  | +         | +  | -  | 0.0005          | 0.0010 | 0.60 | -0.0018         | 0.0034 | 0.61  |
| cg24735226 | 1   | 65096537  | CACHD1         | AHEI | +         | +  | -  | 0.0008          | 0.0015 | 0.60 | -0.0036         | 0.0055 | 0.51  |
| cg07805029 | 1   | 92953256  | GFI1           | AHEI | +         | +  | +  | 0.0010          | 0.0009 | 0.28 | 0.0004          | 0.0016 | 0.79  |
| cg19693031 | 1   | 145441552 | TXNIP          | MDS  | -         | -  | +  | -0.0009         | 0.0014 | 0.52 | 0.0022          | 0.0035 | 0.54  |
| cg24694018 | 1   | 145457621 | POLR3GL        | AHEI | +         | +  | -  | 0.0031          | 0.0036 | 0.40 | -0.0045         | 0.0023 | 0.05  |
| cg01940273 | 2   | 233284934 |                | MDS  | +         | +  | +  | 0.0025          | 0.0026 | 0.34 | 0.0025          | 0.0027 | 0.36  |
| cg20842915 | 7   | 39665132  | RALA           | AHEI | +         | +  | +  | 0.0003          | 0.0007 | 0.68 | 0.0015          | 0.0022 | 0.49  |
| cg02508743 | 8   | 56903623  | LYN            | AHEI | -         | -  | -  | -0.0036         | 0.0032 | 0.26 | -0.0042         | 0.0025 | 0.10  |
| cg27039118 | 8   | 116575902 | TRPS1          | AHEI | +         | +  | -  | 0.0009          | 0.0018 | 0.62 | -0.0039         | 0.0052 | 0.46  |
| cg02716826 | 9   | 33447032  | SUGT1P1;AQP3   | MDS  | +         | +  | +  | 0.0015          | 0.0012 | 0.20 | 0.0009          | 0.0028 | 0.74  |
| cg25953130 | 10  | 63753550  | ARID5B         | AHEI | +         | +  | -  | 0.0030          | 0.0026 | 0.26 | -0.0038         | 0.0046 | 0.41  |
| cg03190891 | 10  | 97201172  | SORBS1         | AHEI | +         | +  | +  | 0.0001          | 0.0022 | 0.95 | 0.0026          | 0.0021 | 0.21  |
| cg02079413 | 11  | 2986505   | SNORA54;NAP1L4 | MDS  | +         | +  | -  | 0.0001          | 0.0005 | 0.86 | -0.0015         | 0.0005 | 0.002 |
| cg11250194 | 11  | 61601937  | FADS2          | AHEI | +         | +  | -  | 0.0003          | 0.0008 | 0.70 | -0.0006         | 0.0017 | 0.71  |
| cg11468085 | 11  | 67435577  | ALDH3B2        | AHEI | -         | -  | -  | -0.0014         | 0.0007 | 0.06 | -0.0026         | 0.0019 | 0.18  |
| cg25909064 | 11  | 120082805 | OAF            | AHEI | +         | +  | +  | 0.0010          | 0.0006 | 0.11 | 0.0019          | 0.0025 | 0.45  |
| cg03646329 | 13  | 48987165  | LPAR6;RB1      | AHEI | -         | -  | -  | -0.0011         | 0.0016 | 0.48 | -0.0055         | 0.0031 | 0.07  |
|            |     |           |                | MDS  | -         | -  | -  | -0.0025         | 0.0016 | 0.12 | -0.0032         | 0.0032 | 0.32  |
| cg16969872 | 13  | 79968324  | RBM26          | MDS  | +         | +  | +  | 0.0030          | 0.0054 | 0.58 | 0.0090          | 0.0033 | 0.006 |
|            |     |           |                | AHEI | +         | +  | +  | 0.0033          | 0.0056 | 0.56 | 0.0084          | 0.0033 | 0.01  |
| cg09940677 | 14  | 103415458 | CDC42BPB       | AHEI | -         | -  | -  | -0.0013         | 0.0018 | 0.45 | -0.0029         | 0.0014 | 0.04  |
| cg13074055 | 14  | 106329206 |                | AHEI | +         | +  | -  | 0.0047          | 0.0054 | 0.38 | -0.0082         | 0.0066 | 0.22  |
| cg27118035 | 16  | 31891978  | ZNF267         | AHEI | -         | -  | -  | -0.0018         | 0.0018 | 0.31 | 0.0000          | 0.0025 | 0.99  |
| cg08732950 | 16  | 89023389  | CBFA2T3        | MDS  | -         | -  | -  | -0.0003         | 0.0013 | 0.81 | -0.0029         | 0.0028 | 0.30  |
| cg02097604 | 17  | 17750910  | TOM1L2         | AHEI | +         | +  | +  | 0.0019          | 0.0023 | 0.41 | 0.0028          | 0.0017 | 0.09  |
|            |     |           |                | MDS  | +         | +  | +  | 0.0018          | 0.0023 | 0.42 | 0.0020          | 0.0017 | 0.25  |
| cg16936953 | 17  | 57915665  | VMP1           | AHEI | -         | -  | +  | -0.0007         | 0.0033 | 0.84 | 0.0004          | 0.0041 | 0.91  |
| cg18181703 | 17  | 76354621  | SOCS3          | MDS  | +         | +  | +  | 0.0041          | 0.0030 | 0.17 | 0.0019          | 0.0030 | 0.54  |
|            |     |           |                | AHEI | +         | +  | +  | 0.0040          | 0.0034 | 0.24 | 0.0010          | 0.0030 | 0.74  |
| cg19202384 | 17  | 79894511  | PYCR1          | AHEI | -         | -  | +  | -0.0004         | 0.0006 | 0.54 | 0.0004          | 0.0027 | 0.87  |
| cg01294327 | 19  | 2291373   | LINGO3         | AHEI | +         | +  | +  | 0.0012          | 0.0029 | 0.67 | 0.0072          | 0.0061 | 0.24  |
| cg26470501 | 19  | 45252955  | BCL3           | AHEI | +         | +  | +  | 0.0024          | 0.0015 | 0.11 | 0.0065          | 0.0023 | 0.005 |
| cg08884571 | 19  | 45901453  | PPP1R13L       | AHEI | +         | +  | -  | 0.0030          | 0.0028 | 0.29 | -0.0085         | 0.0052 | 0.10  |
| cg05232694 | 20  | 48809539  |                | AHEI | -         | -  | +  | -0.0001         | 0.0017 | 0.96 | 0.0023          | 0.0044 | 0.60  |

1. Meta-analysis of AA participants in ARIC and MESA. 2. In MESA

Supplemental Table 13. CpGs with FDR &lt; 0.05 in transethnic meta-analysis

| CpGs                                                   | CHR | Position  | Gene           | Diet | Beta   | SE     | P        | I_squared |
|--------------------------------------------------------|-----|-----------|----------------|------|--------|--------|----------|-----------|
| Unique CpGs identified in trans-ethnicity analysis     |     |           |                |      |        |        |          |           |
| cg17901584                                             | 1   | 55353706  | DHCR24         | AHEI | 0.002  | 0.001  | 9.90E-07 | 0         |
| cg25189904                                             | 1   | 68299493  | GNG12          | MDS  | 0.004  | 0.001  | 2.64E-07 | 0.01      |
| cg02959282                                             | 3   | 136667373 | NCK1           | AHEI | 0.002  | 0.0004 | 8.09E-07 | 0.08      |
| cg18860310                                             | 4   | 87752504  | SLC10A6        | AHEI | 0.002  | 0.0003 | 2.80E-07 | 0         |
| cg22185977                                             | 5   | 1518133   | LPCAT1         | AHEI | -0.004 | 0.001  | 3.72E-09 | 0         |
|                                                        |     |           |                | MDS  | -0.004 | 0.001  | 4.71E-07 | 0.06      |
| cg16567172                                             | 7   | 75931606  | HSPB1          | MDS  | -0.001 | 0.0003 | 1.16E-07 | 0         |
| cg00285394                                             | 8   | 126011954 | SQLE           | AHEI | 0.003  | 0.001  | 1.05E-06 | 0         |
| cg07986378                                             | 12  | 11898284  | ETV6           | MDS  | 0.004  | 0.001  | 1.09E-07 | 0.36      |
| cg02790691                                             | 18  | 32289550  | DTNA           | MDS  | 0.002  | 0.0005 | 6.98E-07 | 0         |
| cg19751789                                             | 19  | 11199944  | LDLR           | AHEI | 0.001  | 0.0002 | 2.49E-08 | 0         |
| CpGs also identified in European Ancestry participants |     |           |                |      |        |        |          |           |
| cg01940273                                             | 2   | 233284934 |                | MDS  | 0.005  | 0.001  | 4.50E-12 | 0         |
| cg20842915                                             | 7   | 39665132  | RALA           | AHEI | 0.002  | 0.001  | 8.74E-07 | 0         |
| cg02716826                                             | 9   | 33447032  | SUGT1P1;AQP3   | MDS  | 0.002  | 0.0004 | 5.58E-07 | 0         |
| cg25953130                                             | 10  | 63753550  | ARID5B         | AHEI | 0.004  | 0.001  | 1.24E-07 | 0.08      |
| cg02079413                                             | 11  | 2986505   | SNORA54;NAP1L4 | MDS  | -0.002 | 0.0003 | 1.49E-08 | 0         |
| cg25909064                                             | 11  | 120082805 | OAF            | AHEI | 0.002  | 0.0003 | 3.29E-07 | 0         |
| cg16969872                                             | 13  | 79968324  | RBM26          | AHEI | 0.003  | 0.001  | 7.41E-08 | 0.16      |
| cg27118035                                             | 16  | 31891978  | ZNF267         | AHEI | -0.002 | 0.0004 | 1.31E-08 | 0         |
| cg08732950                                             | 16  | 89023389  | CBFA2T3        | MDS  | -0.002 | 0.0005 | 2.25E-07 | 0         |
| cg16936953                                             | 17  | 57915665  | TMEM49         | AHEI | 0.003  | 0.001  | 1.46E-07 | 0         |
| cg18181703                                             | 17  | 76354621  | SOCS3          | AHEI | 0.003  | 0.001  | 2.04E-11 | 0.04      |
|                                                        |     |           |                | MDS  | 0.003  | 0.001  | 4.56E-08 | 0.30      |

Supplemental Table 14. Pearson correlation of the 9 unique CpGs in multiethnic meta-analysis with the 32 CpGs significant in European Ancestry participants

|     |           | CHR        | 1          | 1          | 3          | 4          | 5          | 7          | 8          | 12         | 18         | 19         |
|-----|-----------|------------|------------|------------|------------|------------|------------|------------|------------|------------|------------|------------|
|     |           | Position   | 55353706   | 68299493   | 136667373  | 87752504   | 1518133    | 75931606   | 126011954  | 11898284   | 32289550   | 11199944   |
| CHR | Position  | CpG        | cg17901584 | cg25189904 | cg02959282 | cg18860310 | cg22185977 | cg16567172 | cg00285394 | cg07986378 | cg02790691 | cg19751789 |
| 1   | 11123118  | cg04885881 | 0.17       | 0.30       | -0.03      | 0.14       | 0.23       | 0.23       | 0.47       | 0.29       | -0.02      | 0.18       |
| 1   | 65096537  | cg24735226 | -0.08      | 0.06       | -0.12      | -0.13      | -0.05      | 0.21       | 0.12       | 0.01       | -0.06      | 0.01       |
| 1   | 92953256  | cg07805029 | 0.38       | 0.03       | 0.23       | 0.35       | 0.38       | -0.18      | 0.00       | 0.40       | 0.41       | 0.10       |
| 1   | 145441552 | cg19693031 | 0.23       | 0.19       | -0.05      | 0.04       | 0.15       | 0.32       | 0.08       | 0.22       | 0.11       | 0.08       |
| 1   | 145457621 | cg24694018 | 0.36       | 0.17       | 0.16       | 0.30       | 0.39       | 0.13       | 0.30       | 0.49       | 0.20       | 0.18       |
| 2   | 233284934 | cg01940273 | 0.15       | 0.32       | 0.20       | 0.19       | 0.16       | 0.27       | 0.19       | 0.33       | 0.10       | 0.23       |
| 7   | 39665132  | cg20842915 | 0.04       | -0.04      | 0.47       | 0.10       | -0.06      | -0.10      | -0.12      | 0.10       | 0.24       | 0.05       |
| 8   | 56903623  | cg02508743 | 0.20       | 0.12       | -0.22      | 0.05       | 0.14       | -0.03      | 0.21       | 0.25       | 0.14       | 0.00       |
| 8   | 116575902 | cg27039118 | 0.23       | 0.20       | 0.10       | 0.18       | 0.12       | 0.13       | 0.24       | 0.28       | 0.20       | -0.01      |
| 9   | 33447032  | cg02716826 | 0.08       | 0.29       | -0.11      | 0.10       | 0.03       | 0.29       | 0.45       | 0.16       | -0.12      | 0.27       |
| 10  | 63753550  | cg25953130 | -0.08      | 0.18       | 0.18       | 0.05       | -0.05      | 0.18       | 0.26       | 0.02       | -0.03      | 0.12       |
| 10  | 97201172  | cg03190891 | -0.11      | 0.10       | -0.24      | -0.17      | 0.03       | 0.09       | 0.20       | 0.01       | -0.18      | 0.05       |
| 11  | 2986505   | cg02079413 | 0.28       | 0.02       | 0.05       | 0.23       | 0.39       | 0.01       | -0.01      | 0.26       | 0.23       | 0.08       |
| 11  | 61601937  | cg11250194 | 0.49       | 0.17       | 0.05       | 0.32       | 0.33       | 0.08       | 0.19       | 0.48       | 0.28       | 0.31       |
| 11  | 67435577  | cg11468085 | -0.40      | 0.00       | -0.18      | -0.31      | -0.13      | 0.07       | 0.18       | -0.28      | -0.39      | -0.06      |
| 11  | 120082805 | cg25909064 | 0.26       | 0.05       | 0.30       | 0.24       | 0.25       | 0.33       | 0.20       | 0.31       | 0.14       | 0.24       |
| 13  | 48987165  | cg03646329 | -0.33      | 0.02       | 0.19       | -0.20      | -0.29      | 0.12       | 0.02       | -0.25      | -0.14      | 0.13       |
| 13  | 79968324  | cg16969872 | -0.10      | 0.19       | -0.11      | -0.03      | -0.15      | 0.08       | 0.25       | 0.00       | -0.12      | -0.09      |
| 14  | 103415458 | cg09940677 | -0.12      | 0.00       | -0.08      | -0.19      | 0.09       | 0.00       | 0.14       | 0.03       | -0.11      | -0.07      |
| 14  | 106329206 | cg13074055 | 0.18       | 0.17       | 0.01       | 0.16       | 0.11       | -0.07      | 0.22       | 0.24       | 0.11       | 0.05       |
| 16  | 31891978  | cg27118035 | -0.10      | -0.04      | -0.16      | -0.18      | -0.08      | -0.01      | 0.04       | -0.06      | -0.03      | -0.05      |
| 16  | 89023389  | cg08732950 | 0.12       | 0.09       | -0.06      | 0.03       | 0.27       | 0.30       | 0.06       | 0.18       | 0.07       | 0.12       |
| 17  | 17750910  | cg02097604 | 0.29       | 0.18       | 0.11       | 0.30       | 0.31       | 0.21       | 0.36       | 0.33       | 0.14       | 0.12       |
| 17  | 57915665  | cg16936953 | 0.00       | 0.19       | -0.15      | 0.14       | -0.11      | 0.21       | 0.31       | -0.04      | -0.10      | 0.15       |
| 17  | 76354621  | cg18181703 | 0.20       | 0.28       | 0.02       | 0.24       | 0.07       | 0.32       | 0.48       | 0.26       | 0.03       | 0.29       |
| 17  | 79894511  | cg19202384 | 0.07       | 0.03       | 0.31       | 0.20       | 0.12       | 0.18       | 0.14       | 0.14       | 0.12       | 0.14       |
| 19  | 2291373   | cg01294327 | 0.12       | 0.13       | 0.12       | 0.07       | 0.03       | 0.18       | 0.19       | 0.18       | 0.08       | 0.07       |
| 19  | 45252955  | cg26470501 | 0.23       | 0.23       | 0.11       | 0.22       | 0.15       | 0.22       | 0.43       | 0.33       | 0.06       | 0.13       |
| 19  | 45901453  | cg08884571 | 0.21       | 0.09       | -0.03      | 0.12       | 0.09       | 0.11       | 0.04       | 0.21       | 0.13       | 0.03       |
| 20  | 48809539  | cg05232694 | 0.32       | 0.09       | 0.21       | 0.28       | 0.10       | 0.13       | 0.24       | 0.34       | 0.28       | 0.24       |



Supplemental Table 15. Functional description for protein coding genes annotated to diet-associated CpGs

| CpG        | CHR | Position  | Gene    | Full name                                    | Description                                                                                                                                                                                                                                                                                                                                                                                                                                                                                                                                                                                                                                                                                                                                            |
|------------|-----|-----------|---------|----------------------------------------------|--------------------------------------------------------------------------------------------------------------------------------------------------------------------------------------------------------------------------------------------------------------------------------------------------------------------------------------------------------------------------------------------------------------------------------------------------------------------------------------------------------------------------------------------------------------------------------------------------------------------------------------------------------------------------------------------------------------------------------------------------------|
| cg17901584 | 1   | 55353706  | DHCR24  | 24-dehydrocholesterol reductase              | This gene encodes a flavin adenine dinucleotide (FAD)-dependent oxidoreductase which catalyzes the reduction of the delta-24 double bond of sterol intermediates during cholesterol biosynthesis. The protein contains a leader sequence that directs it to the endoplasmic reticulum membrane. Missense mutations in this gene have been associated with desmosterolosis. Also, reduced expression of the gene occurs in the temporal cortex of Alzheimer disease patients and overexpression has been observed in adrenal gland cancer cells.                                                                                                                                                                                                        |
| cg25189904 | 1   | 68299493  | GNG12   | G protein subunit gamma 12                   | Among its related pathways are Beta-Adrenergic Signaling and Development Dopamine D2 receptor transactivation of EGFR. Gene Ontology (GO) annotations related to this gene include obsolete signal transducer activity and phosphate ion binding                                                                                                                                                                                                                                                                                                                                                                                                                                                                                                       |
| cg02959282 | 3   | 136667373 | NCK1    | NCK adaptor protein 1                        | The protein encoded by this gene is one of the signaling and transforming proteins containing Src homology 2 and 3 (SH2 and SH3) domains. It is located in the cytoplasm and is an adaptor protein involved in transducing signals from receptor tyrosine kinases to downstream signal recipients such as RAS.                                                                                                                                                                                                                                                                                                                                                                                                                                         |
| cg18860310 | 4   | 87752504  | SLC10A6 | Solute carrier family 10 member 6            | Among its related pathways are Transport of glucose and other sugars, bile salts and organic acids, metal ions and amine compounds. Gene Ontology (GO) annotations related to this gene include bile acid:sodium symporter activity and sodium-dependent organic anion transmembrane transporter activity.                                                                                                                                                                                                                                                                                                                                                                                                                                             |
| cg22185977 | 5   | 1518133   | LPCAT1  | Lysophosphatidylcholine acyltransferase 1    | This gene encodes a member of the 1-acyl-sn-glycerol-3-phosphate acyltransferase family of proteins. The encoded enzyme plays a role in phospholipid metabolism, specifically in the conversion of lysophosphatidylcholine to phosphatidylcholine in the presence of acyl-CoA. This process is important in the synthesis of lung surfactant and platelet-activating factor (PAF). Elevated expression of this gene may contribute to the progression of oral squamous cell, prostate, breast, and other human cancers.                                                                                                                                                                                                                                |
| cg16567172 | 7   | 75931606  | HSPB1   | Heat shock protein family B (small) member 1 | This gene encodes a member of the small heat shock protein (HSP20) family of proteins. In response to environmental stress, the encoded protein translocates from the cytoplasm to the nucleus and functions as a molecular chaperone that promotes the correct folding of other proteins. This protein plays an important role in the differentiation of a wide variety of cell types. Expression of this gene is correlated with poor clinical outcome in multiple human cancers, and the encoded protein may promote cancer cell proliferation and metastasis, while protecting cancer cells from apoptosis. Mutations in this gene have been identified in human patients with Charcot-Marie-Tooth disease and distal hereditary motor neuropathy. |
| cg00285394 | 8   | 126011954 | SQLE    | Squalene epoxidase                           | Squalene epoxidase catalyzes the first oxygenation step in sterol biosynthesis and is thought to be one of the rate-limiting enzymes in this pathway.                                                                                                                                                                                                                                                                                                                                                                                                                                                                                                                                                                                                  |
| cg07986378 | 12  | 11898284  | ETV6    | ETS variant 6                                | This gene encodes an ETS family transcription factor. The product of this gene contains two functional domains: a N-terminal pointed (PNT) domain that is involved in protein-protein interactions with itself and other proteins, and a C-terminal DNA-binding domain. Gene knockout studies in mice suggest that it is required for hematopoiesis and maintenance of the developing vascular network. This gene is known to be involved in a large number of chromosomal rearrangements associated with leukemia and congenital fibrosarcoma.                                                                                                                                                                                                        |
| cg02790691 | 18  | 32289550  | DTNA    | Dystrobrevin alpha                           | The protein encoded by this gene belongs to the dystrobrevin subfamily of the dystrophin family. This protein is a component of the dystrophin-associated protein complex (DPC), which consists of dystrophin and several integral and peripheral membrane proteins, including dystroglycans, sarcoglycans, syntrophins and alpha- and beta-dystrobrevin. The DPC localizes to the sarcolemma and its disruption is associated with various forms of muscular dystrophy. Mutations in this gene are associated with left ventricular noncompaction with congenital heart defects.                                                                                                                                                                      |
| cg19751789 | 19  | 11199944  | LDLR    | Low density lipoprotein receptor             | The low density lipoprotein receptor (LDLR) gene family consists of cell surface proteins involved in receptor-mediated endocytosis of specific ligands. Low density lipoprotein (LDL) is normally bound at the cell membrane and taken into the cell ending up in lysosomes where the protein is degraded and the cholesterol is made available for repression of microsomal enzyme 3-hydroxy-3-methylglutaryl coenzyme A (HMG CoA) reductase, the rate-limiting step in cholesterol synthesis. At the same time, a reciprocal stimulation of cholesterol ester synthesis takes place. Mutations in this gene cause the autosomal dominant disorder, familial hypercholesterolemia.                                                                   |

Supplemental Table 16. Enrichment analysis for the 10 unique CpGs identified in transethnic analysis

| Gene set | Pathway                                        | N_genes | N_overlap | P       | adjusted P | Genes                      |
|----------|------------------------------------------------|---------|-----------|---------|------------|----------------------------|
| KEGG     | KEGG_STEROID_BIOSYNTHESIS                      | 17      | 2         | 4.8E-08 | 8.9E-06    | DHCR24, SQLE               |
| Reactome | REACTOME_CHOLESTEROL_BIOSYNTHESIS              | 22      | 2         | 1.1E-07 | 7.3E-05    | DHCR24, SQLE               |
|          | REACTOME_METABOLISM_OF_LIPIDS_AND_LIPOPROTEINS | 468     | 4         | 9.6E-07 | 6.5E-04    | DHCR24, LDLR, LPCAT1, SQLE |

P was calculated using hypergeometric test through FUMA GWAS platform. Bonferroni correction was used to calculate adjusted P

Supplemental Table 17. Unique CpGs identified in transethnic analysis also reported in EWAS catalog

| CpG        | Direction. |                                            | Direction. |           |          |          |      |       | Tissue                                 | PMID     |
|------------|------------|--------------------------------------------|------------|-----------|----------|----------|------|-------|----------------------------------------|----------|
|            | Diet       | Trait                                      | Trait      | Beta      | SE       | P        | N    | Age   |                                        |          |
| cg17901584 | +          | Serum high-density lipoprotein cholesterol | +          | 7.17E-04  | 5.21E-05 | 5.47E-43 | 2306 | 68    | Whole blood                            | 28213390 |
| cg25189904 | +          | Smoking                                    |            |           |          | 1.71E-39 | 1011 | 60.8  | Whole blood                            | 23691101 |
| cg25189904 | +          | Smoking                                    | -          | -5.60E-01 | 0.0471   | 1.25E-32 | 582  | 54    | Whole blood                            | 25556184 |
| cg25189904 | +          | Smoking                                    |            |           |          | 2.43E-23 | 721  | 52.6  | Peripheral blood                       | 26864933 |
| cg25189904 | +          | Smoking                                    | -          | -7.68E-02 | 0.008    | 5.2E-22  | 9389 | 60.3  | Whole blood, CD4+ T cells or monocytes | 27651444 |
| cg17901584 | +          | Serum triglycerides                        | -          | -1.86E-02 | 0.001963 | 3.07E-21 | 2306 | 68    | Whole blood                            | 28213390 |
| cg07986378 | +          | Smoking                                    |            |           |          | 8.98E-20 | 721  | 52.6  | Peripheral blood                       | 26864933 |
| cg07986378 | +          | Smoking                                    | -          | -3.10E-01 | 0.0355   | 2.57E-18 | 582  | 54    | Whole blood                            | 25556184 |
| cg25189904 | +          | Tobacco smoking                            |            |           |          | 1.23E-16 | 454  | 52    | Whole blood                            | 28225026 |
| cg25189904 | +          | Smoking                                    | -          | -4.00E-02 | 0.0049   | 3E-16    | 400  | 53    | Buccal cells                           | 26181258 |
| cg25189904 | +          | Smoking                                    | -          | -7.64E-01 | 0.0942   | 4.72E-16 | 1597 | 67    | Peripheral blood                       | 28686328 |
| cg07986378 | +          | Smoking                                    | -          | -7.39E-01 | 0.0922   | 1.08E-15 | 1597 | 67    | Peripheral blood                       | 28686328 |
| cg25189904 | +          | Smoking                                    | -          | -7.70E-02 | 0.0098   | 3.77E-15 | 535  | 70    | Whole blood                            | 25249537 |
| cg25189904 | +          | Smoking                                    |            |           |          | 8.26E-14 | 449  | 63.1  | Peripheral blood                       | 26829059 |
| cg25189904 | +          | Smoking                                    | -          | -0.296    | 0.044253 | 2.25E-11 | 596  | 53.9  | Whole blood                            | 26756918 |
| cg17901584 | +          | Body mass index                            | -          | -13.7     | 2        | 1.4E-10  | 5387 | 54.5  | Whole blood                            | 28002404 |
| cg25189904 | +          | Serum cotinine                             | -          | -0.0009   | 0.00014  | 2.23E-10 | 500  | 62    | Whole blood                            | 26826776 |
| cg18860310 | +          | C-reactive protein                         | -          | -0.0031   | 0.000492 | 2.96E-10 | 8863 | 65    | Whole blood                            | 27955697 |
| cg00285394 | +          | Serum total cholesterol                    | +          | 0.000213  | 3.44E-05 | 5.98E-10 | 2306 | 68    | Whole blood                            | 28213390 |
| cg07986378 | +          | Smoking                                    | -          | -0.029    | 0.0047   | 1E-09    | 9389 | 60.3  | Whole blood, CD4+ T cells or monocytes | 27651444 |
| cg00285394 | +          | Serum low-density lipoprotein cholesterol  | +          | 0.00023   | 0.000039 | 4.12E-09 | 2304 | 68    | Whole blood                            | 28213390 |
| cg25189904 | +          | Smoking                                    |            |           |          | 4.89E-09 | 464  | 55.39 | Whole Blood                            | 25424692 |
| cg17901584 | +          | Triglycerides                              | -          | -0.0162   | 0.0029   | 1.56E-08 | 725  | 60    | Whole blood                            | 28194238 |
| cg25189904 | +          | Smoking                                    | -          | -0.027    | 0.0049   | 3.13E-08 | 421  | 43.8  | Whole Blood                            | 24334605 |
| cg07986378 | +          | Tobacco smoking                            |            |           |          | 4.44E-08 | 454  | 52    | Whole blood                            | 28225026 |
| cg17901584 | +          | Serum total cholesterol                    | +          | 0.000149  | 2.73E-05 | 4.73E-08 | 2306 | 68    | Whole blood                            | 28213390 |
| cg17901584 | +          | High-density lipoprotein cholesterol       | +          | 0.0196    | 0.0036   | 6.44E-08 | 725  | 60    | Whole blood                            | 28194238 |
| cg17901584 | +          | Waist circumference                        | -          | -0.008    | 0.0015   | 8.34E-08 | 2097 | 56.2  | Leukocytes                             | 25935004 |
| cg02790691 | +          | Alcohol consumption der day                | -          | -0.00026  | 5.25E-05 | 9.26E-07 | 9643 | 64.2  | Whole blood                            | 27843151 |
| cg07986378 | +          | Alcohol consumption per day                | -          | -0.00053  | 0.00011  | 1.52E-06 | 1251 | 60    | CD14+ monocytes                        | 27843151 |
| cg25189904 | +          | Alcohol consumption per day                | -          | -0.0001   | 2.13E-05 | 1.97E-06 | 2423 | 56    | Whole blood                            | 27843151 |
| cg25189904 | +          | Smoking                                    |            |           |          | 2.84E-06 | 184  | 50.5  | Peripheral blood                       | 23175441 |
| cg22185977 | -          | Alcohol consumption per day                | +          | 4.46E-05  | 9.74E-06 | 4.76E-06 | 2423 | 56    | Whole blood                            | 27843151 |
| cg17901584 | +          | Body mass index                            | -          | -0.0433   | 0.0095   | 1.05E-05 | 442  | 67    | Whole blood                            | 28095459 |
| cg07986378 | +          | Smoking                                    | -          | -0.185    | 0.042041 | 1.08E-05 | 596  | 53.9  | Whole blood                            | 26756918 |
| cg18860310 | +          | Alcohol consumption der day                | -          | -0.00015  | 3.46E-05 | 2.61E-05 | 9643 | 64.2  | Whole blood                            | 27843151 |
| cg16567172 | -          | Smoking                                    | +          | 0.0055    | 0.0014   | 0.000072 | 9389 | 60.3  | Whole blood, CD4+ T cells or monocytes | 27651444 |
| cg25189904 | +          | Alcohol consumption der day                | -          | -0.00023  | 5.94E-05 | 0.00012  | 9643 | 64.2  | Whole blood                            | 27843151 |
| cg19751789 | +          | Smoking                                    | -          | -0.0033   | 0.0009   | 0.0004   | 9389 | 60.3  | Whole blood, CD4+ T cells or monocytes | 27651444 |
| cg16567172 | -          | Alcohol consumption der day                | -          | -8.9E-05  | 2.61E-05 | 0.000686 | 9643 | 64.2  | Whole blood                            | 27843151 |

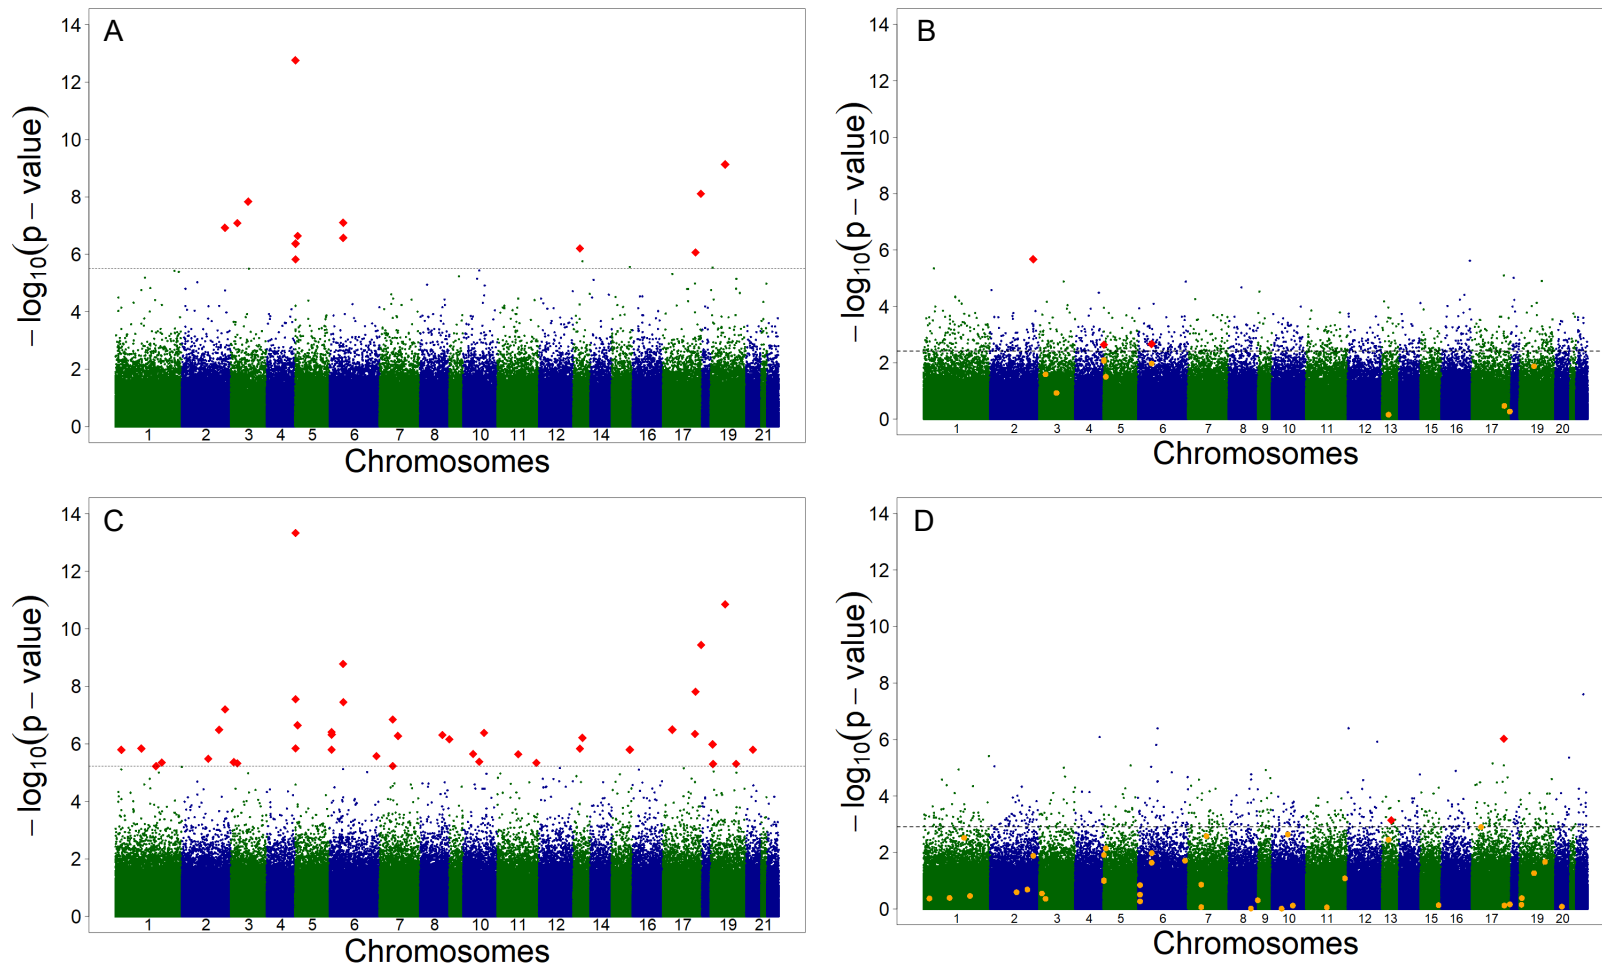

Supplemental Figure 1. Manhattan plots in discovery (A for MDS and C for AHEI) and in replication (B for MDS and D for AHEI) analyses in European ancestry participants. Models were adjusted for sex, age, and energy intake. Dashed lines represent FDR < 0.05 (corresponding p-value of  $1.5 \times 10^{-6}$  for MDS and  $6 \times 10^{-6}$  for AHEI). In B and D, orange colored dots are CpGs with FDR < 0.05 in discovery analysis and red colored dots are replicated CpGs. Dashed lines represent Bonferroni corrected p-value threshold ( $0.05/13$  for MDS and  $0.05/24$  for AHEI). AHEI: Alternative Healthy Eating Index. MDS: Mediterranean-style diet score. FDR: false discovery rate.

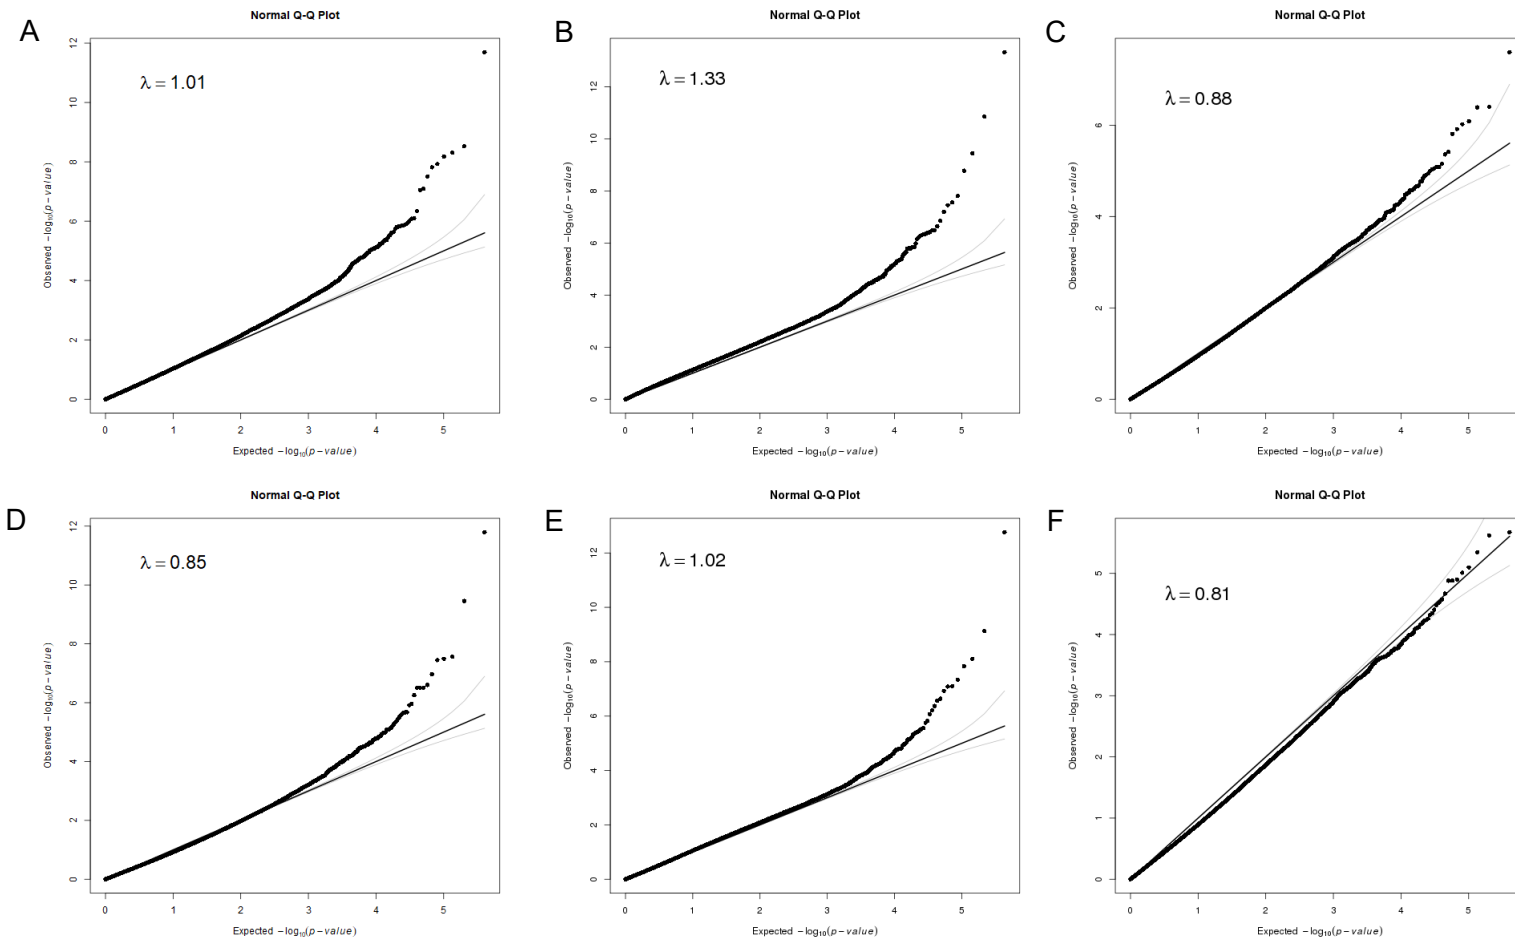

Supplemental Figure 2. Quantile-Quantile (QQ) plots with lambda values generated using the sex- and age-adjusted model in European Ancestry (EA) participants. Plots A to C are for analyses using AHEI in all EA participants, in discovery cohort (FHS), and in replication cohorts (ARIC, GOLDN, MESA, and RS), respectively. Plots D to F are for analyses using MDS in all EA participants, in discovery cohort, and in replication cohorts. AHEI: Alternative Healthy Eating Index. MDS: Mediterranean-style diet score.

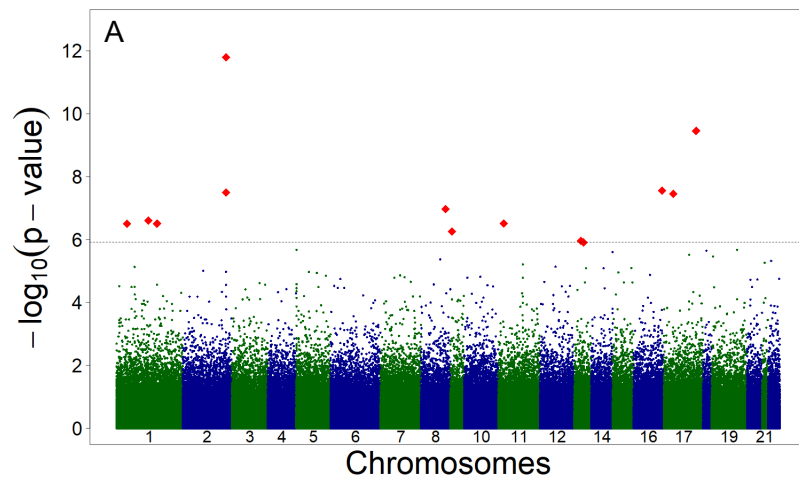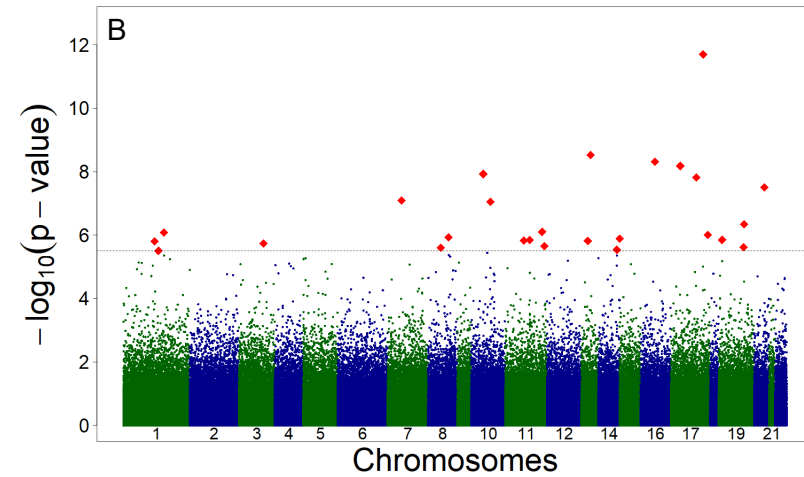

Supplemental Figure 3. Manhattan plots generated from meta-analyses using the sex, age, and energy intake adjusted models in European ancestry participants. A is for MDS and B is for AHEI. Dotted lines represent  $FDR < 0.05$ , corresponding p-value of  $3.1 \times 10^{-6}$  for AHEI and  $1.2 \times 10^{-6}$  for MDS. CpGs close to (within  $\pm 500\text{kb}$ ) and correlated with (Pearson  $|r| > 0.7$ ) a CpG with a lower p-value and CpGs with p-value  $> 0.05$  and discordant direction in the discovery and replication cohorts were excluded in subsequent analysis. AHEI: Alternative Healthy Eating Index. MDS: Mediterranean-style diet score. FDR: false discovery rate.

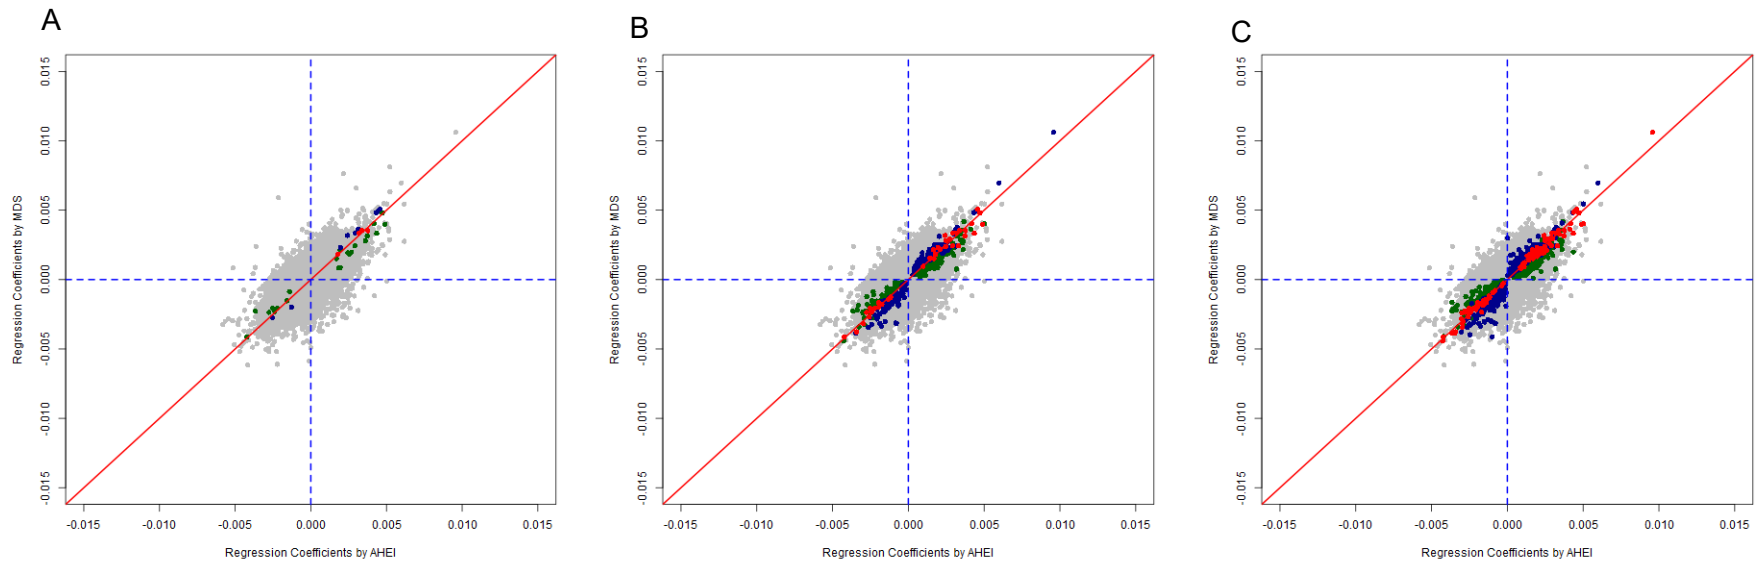

Supplemental Figure 4. Correlation of regression coefficients generated from analysis using AHEI with that from analysis using MDS. Grey dots are for all CpGs and colored (green, blue, and red) dots are for CpGs with FDR < 0.05 in A, top 200 CpGs in B, and top 500 CpGs in C. Green dots represent analysis using AHEI, blue dots represent analysis using MDS, and red dots represent overlapped CpGs, e.g., in plot A, green dots are CpGs with FDR < 0.05 in AHEI analysis, blue dots are CpGs with FDR < 0.05 in MDS analysis, and red dots are CpGs with FDR < 0.05 in both analyses using AHEI and MDS. AHEI: Alternative Healthy Eating Index. MDS: Mediterranean-style diet score. FDR: false discovery rate.

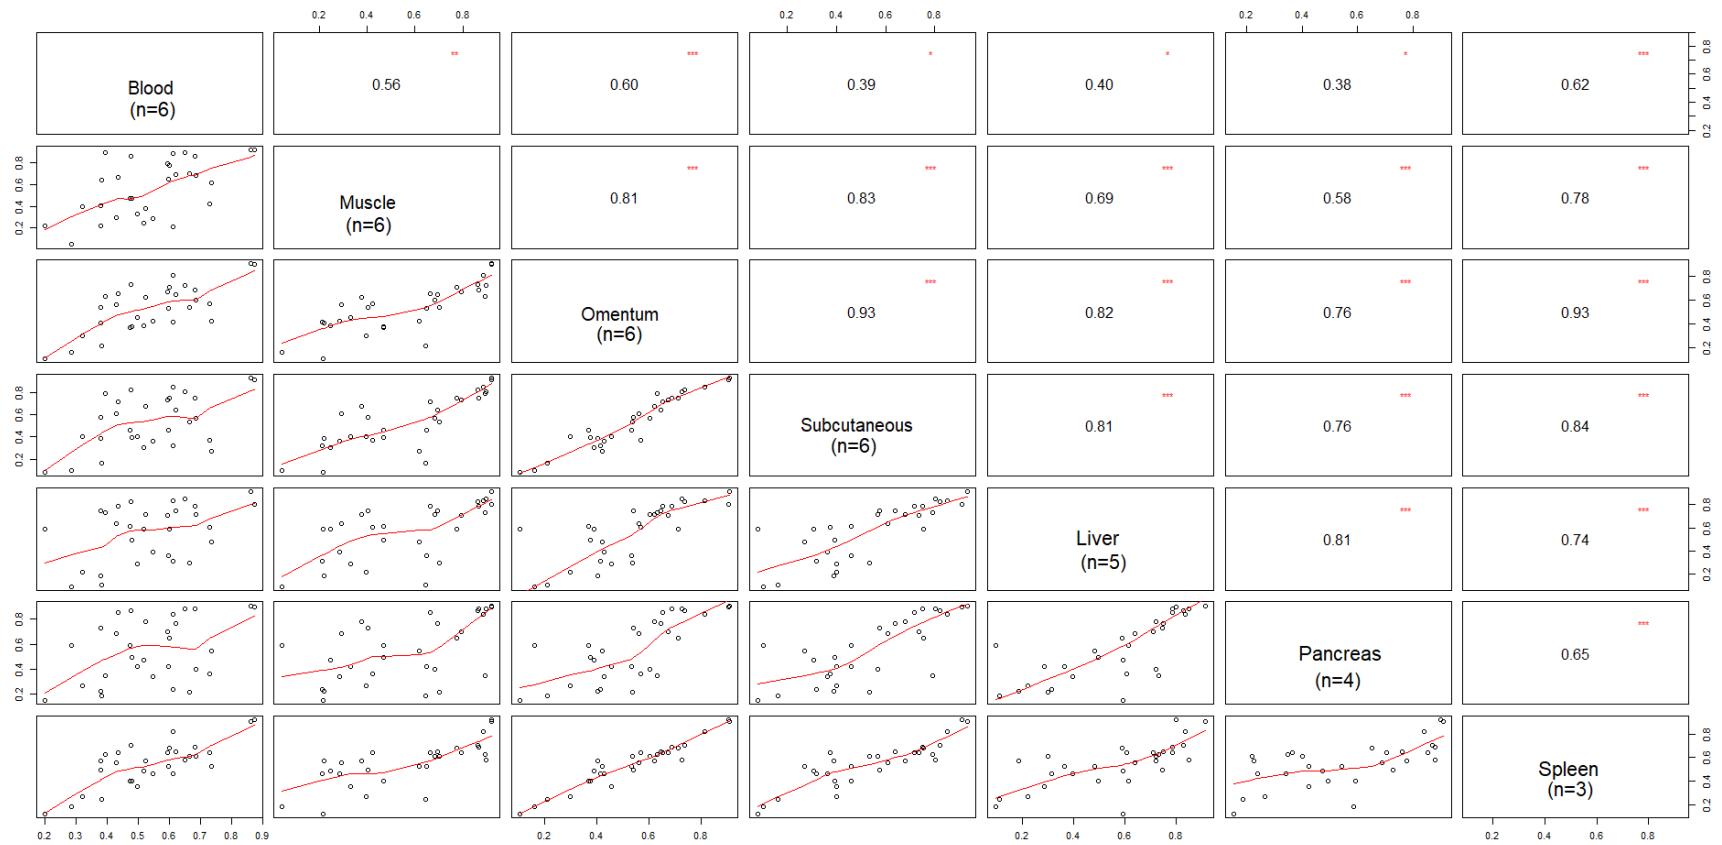

Supplemental Figure 5. Correlation of mean DNA methylation levels in peripheral whole blood with that measured in six internal tissues including muscle, omentum, subcutaneous adipose tissue, liver, pancreas, and spleen. \*\*\* < 0.0001; \*\* < 0.01, \* < 0.05.



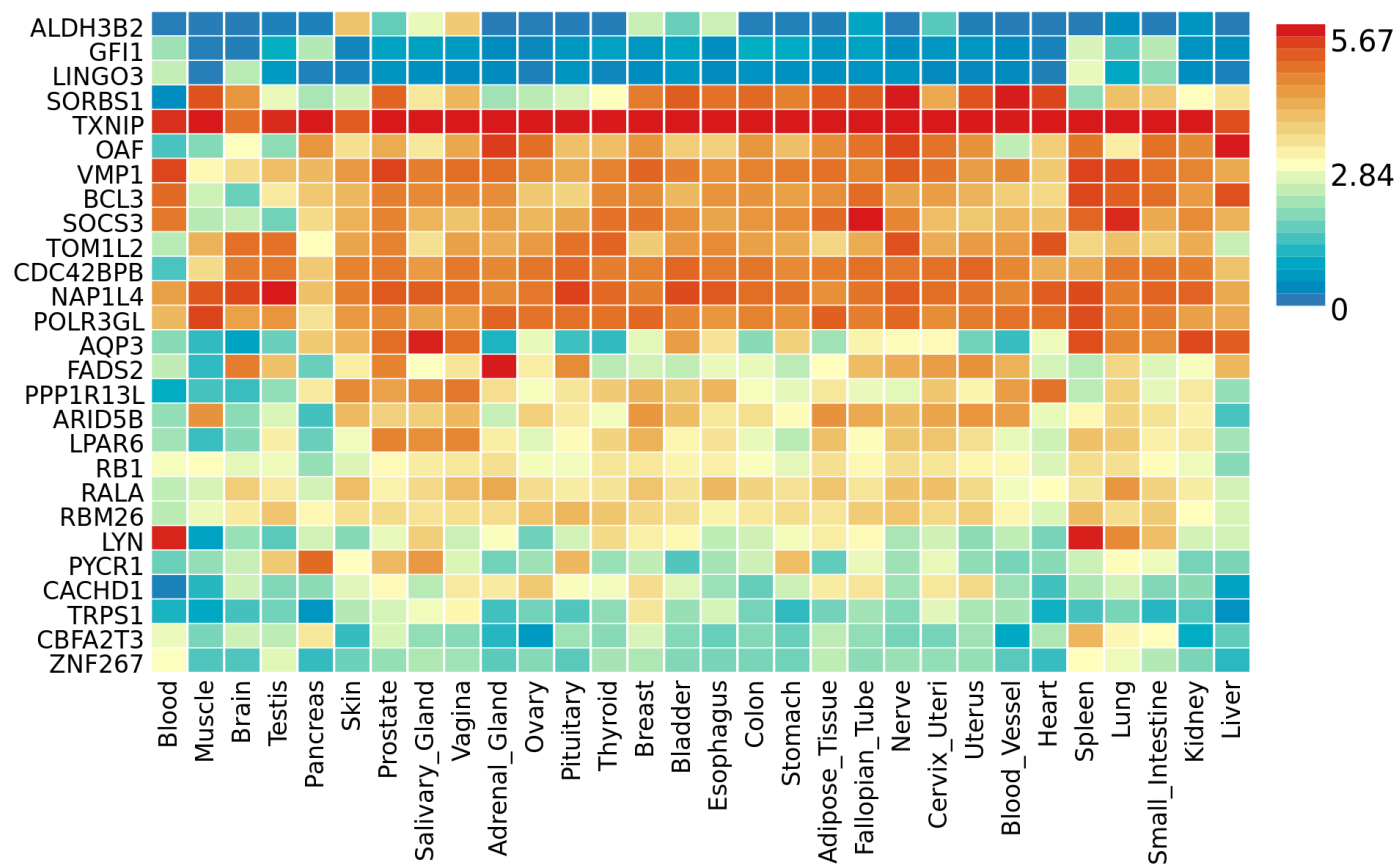

Supplemental Figure 6. Heatmap for average expression of the annotated 29 protein coding genes in 30 specific tissue types. Colors represent average expression value (log2 transformed Reads Per Kilobase per Million per tissue per gene, winsorization at 50). Higher expression is represented using darker red and lower expression is represented by darker blue. Figure downloaded from GTEx through FUMA GWAS ([www.fuma.ctglab.nl/](http://www.fuma.ctglab.nl/)). GTEx: Genotype-Tissue Expression. FUMA GWAS: Functional Mapping and Annotation of Genome-Wide Association Studies.
